# Supplementary material for: Base-mediated synthesis of aryl enol ethers from α-aryl allylic alcohols and arylsulfonium salts
Source: Royal Society of Chemistry journal article supplement (doi:10.1039/d4ob01220h), 2024-01-01

## Supporting Information

### Base-Mediated Synthesis of Aryl Enol Ethers from Allylic Alcohols and Arylsulfonium Salts

Yu-Fei Yao<sup>†</sup>, Jia-Wei Song<sup>†</sup>, Cheng-Pan Zhang\*

School of Chemistry, Chemical Engineering and Life Science, Hubei Key Laboratory  
of Nanomedicine for Neurodegenerative Diseases, Wuhan University of Technology,  
Wuhan 430070, China.

E-mail: cpzhang@whut.edu.cn, zhangchengpan1982@hotmail.com.

ORCID for Cheng-Pan Zhang: 0000-0002-2803-4611.

<sup>†</sup> These two authors contribute equally in this work

#### Table of Contents

|                                                                                                                                                            |     |
|------------------------------------------------------------------------------------------------------------------------------------------------------------|-----|
| 1. General information.....                                                                                                                                | S2  |
| 2. Screening of the optimal reaction conditions for the base-mediated synthesis of aryl enol ether.....                                                    | S2  |
| 3. Based-mediated synthesis of phenyl enol ethers ( <b>3</b> ) from diverse allylic alcohols ( <b>1</b> ) with [Ph <sub>3</sub> S][OTf] ( <b>2a</b> )..... | S7  |
| 4. Base-mediated synthesis of aryl enol ethers from 1-phenylprop-2-en-1-ol ( <b>1a</b> ) with different arylsulfonium salts.....                           | S16 |
| 5. The control experiments for mechanistic insights.....                                                                                                   | S30 |
| 6. NMR spectra of the products.....                                                                                                                        | S34 |

## 1. General information

All reactions were carried out under a nitrogen atmosphere. Unless otherwise specified, NMR spectra were recorded in CDCl<sub>3</sub> on a 500 MHz (for <sup>1</sup>H), 471 MHz (for <sup>19</sup>F), and 126 MHz (for <sup>13</sup>C) spectrometer. All chemical shifts were reported in ppm relative to TMS (0 ppm for <sup>1</sup>H NMR) or PhCF<sub>3</sub> (-63.5 ppm for <sup>19</sup>F NMR) as an internal or external standard. The HPLC experiments were conducted on a Wufeng LC-100 II instrument (column: Shodex, C18, 5 μm, 4.6 × 250 mm), and the yields of product were determined by using the corresponding pure compound as an external standard. The coupling constants were reported in Hertz (Hz). The following abbreviations were used to explain the multiplicities: s = singlet, d = doublet, t = triplet, q = quartet, m = multiplet, brs = broad singlet, dd = doublet of doublets, td = triplet of doublets, dm = doublet of multiplets, and tm = triplet of multiplets. Melting points of solid products were measured and uncorrected. MS experiments were performed on a TOF-Q ESI instrument. Dibenzo[*b,d*]thiophene 5-oxide (DBTO),<sup>1</sup> thianthrene 5-oxide (TTO),<sup>2</sup> phenoxathiine 10-oxide,<sup>3</sup> 10-methyl-10*H*-phenothiazine 5-oxide,<sup>4</sup> and aryl sulfonium salts<sup>5,6</sup> were prepared according to the literature. Allylic alcohols were prepared according to the literature.<sup>7</sup> Solvents were dried before use according to the literature. Other reagents used in the reactions were all purchased from the commercial sources and used without further purification. Reactions that require heating employed oil bath as the heat source.

## 2. Screening of the optimal reaction conditions for the base-mediated synthesis of aryl enol ether

**Table S1.** Transition-metal-free synthesis of aryl enol ether (**3a**) from **1a** and **2a** in the presence of different bases.<sup>a</sup>

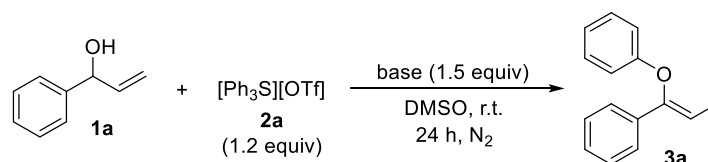

| Entry    | Base                            | Yield ( <b>3a</b> , %) |
|----------|---------------------------------|------------------------|
| 1        | K <sub>2</sub> HPO <sub>4</sub> | 0                      |
| 2        | K <sub>3</sub> PO <sub>4</sub>  | 7                      |
| <b>3</b> | <b>NaOH</b>                     | <b>89</b>              |

|                 |                                 |       |
|-----------------|---------------------------------|-------|
| 4               | KOH                             | 84    |
| 5               | <i>t</i> -BuOK                  | 55    |
| 6               | NaH                             | 68    |
| 7               | NaHCO <sub>3</sub>              | trace |
| 8               | Na <sub>2</sub> CO <sub>3</sub> | 0     |
| 9               | K <sub>2</sub> CO <sub>3</sub>  | 0     |
| 10              | LiOH                            | 10    |
| 11              | CsOH                            | 87    |
| 12              | Cs <sub>2</sub> CO <sub>3</sub> | 19    |
| 13              | DBU                             | trace |
| 14              | Et <sub>3</sub> N               | trace |
| 15 <sup>b</sup> | NaOH                            | 78    |

<sup>a</sup> Reaction conditions: **1a** (0.1 mmol), **2a** (0.12 mmol), base (0.15 mmol), DMSO (1 mL), room temperature, N<sub>2</sub>, and 24 h. The yields were determined by HPLC using pure **3a** as an external standard (*t*<sub>R</sub> = 10.5 min, λ<sub>max</sub> = 252 nm, water / methanol = 20 / 80 (v / v)). <sup>b</sup> The reaction was run under an air atmosphere.

**Table S2.** NaOH-mediated synthesis of **3a** from **1a** and **2a** in different solvents.<sup>a</sup>

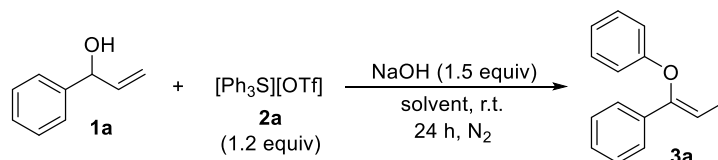

| Entry    | Solvent          | Yield ( <b>3a</b> , %) |
|----------|------------------|------------------------|
| <b>1</b> | <b>DMSO</b>      | <b>89</b>              |
| 2        | DMF              | 38                     |
| 3        | THF              | trace                  |
| 4        | MeCN             | trace                  |
| 5        | 1,4-dioxane      | trace                  |
| 6        | DMAc             | 47                     |
| 7        | DG               | 13                     |
| 8        | <i>n</i> -hexane | trace                  |
| 9        | acetone          | 13                     |

<sup>a</sup> Reaction conditions: **1a** (0.1 mmol), **2a** (0.12 mmol), NaOH (0.15 mmol), solvent (1

mL), room temperature, N<sub>2</sub>, and 24 h. The yields were determined by HPLC using pure **3a** as an external standard ( $t_R = 10.5$  min,  $\lambda_{max} = 252$  nm, water / methanol = 20 / 80 (v / v)).

**Table S3.** NaOH-mediated synthesis of **3a** from **1a** and **2a** at different temperatures.<sup>a</sup>

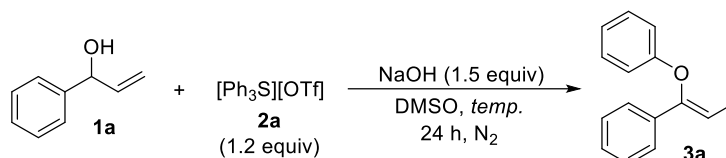

| Entry    | Temperature (°C) | Yield ( <b>3a</b> , %) |
|----------|------------------|------------------------|
| <b>1</b> | <b>r.t.</b>      | <b>89</b>              |
| 2        | 40               | 92                     |
| 3        | 60               | 91                     |
| 4        | 80               | 94                     |

<sup>a</sup> Reaction conditions: **1a** (0.1 mmol), **2a** (0.12 mmol), NaOH (0.15 mmol), DMSO (1 mL), room temperature to 80 °C, N<sub>2</sub>, and 24 h. The yields were determined by HPLC using pure **3a** as an external standard ( $t_R = 10.5$  min,  $\lambda_{max} = 252$  nm, water / methanol = 20 / 80 (v / v)).

**Table S4.** NaOH-mediated synthesis of **3a** from **1a** and **2a** in different times.<sup>a</sup>

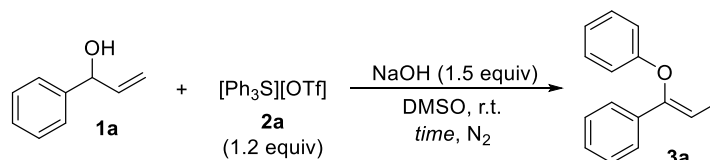

| Entry    | Time (h)  | Yield ( <b>3a</b> , %) |
|----------|-----------|------------------------|
| 1        | 3         | 83                     |
| 2        | 6         | 92                     |
| <b>3</b> | <b>12</b> | <b>91</b>              |
| 4        | 24        | 89                     |

<sup>a</sup> Reaction conditions: **1a** (0.1 mmol), **2a** (0.12 mmol), NaOH (0.15 mmol), DMSO (1 mL), room temperature, N<sub>2</sub>, and 3-24 h. The yields were determined by HPLC using pure **3a** as an external standard ( $t_R = 10.5$  min,  $\lambda_{max} = 252$  nm, water / methanol = 20 / 80 (v / v)).

**Table S5.** NaOH-mediated synthesis of **3a** from **1a** and **2a** using different reactant molar ratios.<sup>a</sup>

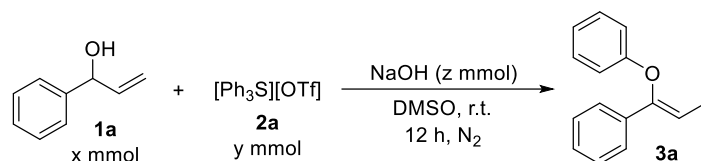

| Entry | x : y : z        | Yield ( <b>3a</b> , %) |
|-------|------------------|------------------------|
| 1     | 1:1.2:1.5        | 91                     |
| 2     | <b>1:1.2:1.2</b> | <b>87</b>              |
| 3     | 1:1:1            | 64                     |

<sup>a</sup> Reaction conditions: **1a** (0.1 mmol), **2a** (0.12 or 0.1 mmol), NaOH (0.12 or 0.15 mmol), DMSO (1 mL), room temperature, N<sub>2</sub>, and 12 h. The yields were determined by HPLC using pure **3a** as an external standard ( $t_R = 10.5$  min,  $\lambda_{max} = 252$  nm, water / methanol = 20 / 80 (v / v)).

**Table S6.** Base-mediated synthesis of **3a** from **1a** and **2ea** with different bases.<sup>a</sup>

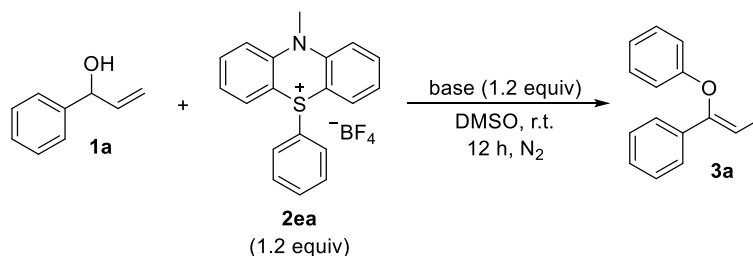

| Entry    | Base                            | Yield ( <b>3a</b> , %) |
|----------|---------------------------------|------------------------|
| 1        | NaOH                            | 72                     |
| 2        | KOH                             | 66                     |
| <b>3</b> | <b>CsOH</b>                     | <b>76</b>              |
| 4        | Cs <sub>2</sub> CO <sub>3</sub> | 9                      |
| 5        | <i>t</i> -BuOK                  | 63                     |
| 6        | NaH                             | 66                     |

<sup>a</sup> Reaction conditions: **1a** (0.1 mmol), **2ea** (0.12 mmol), base (0.12 mmol), DMSO (1 mL), room temperature, N<sub>2</sub>, and 12 h. The yields were determined by HPLC using pure **3a** as an external standard ( $t_R = 10.5$  min,  $\lambda_{max} = 252$  nm, water / methanol = 20 / 80 (v / v)).

**Table S7.** Base-mediated synthesis of **3a** from **1a** and **2ea** at different temperatures.<sup>a</sup>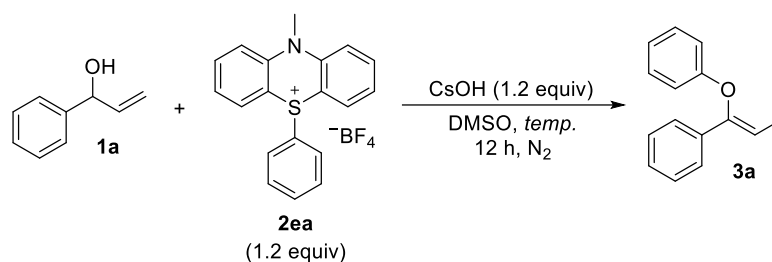

| Entry | Temperature (°C) | Yield ( <b>3a</b> , %) |
|-------|------------------|------------------------|
| 1     | 40               | 77                     |
| 2     | <b>60</b>        | <b>79</b>              |
| 3     | 80               | 62                     |
| 4     | 100              | 62                     |

<sup>a</sup> Reaction conditions: **1a** (0.1 mmol), **2ea** (0.12 mmol), CsOH (0.12 mmol), DMSO (1 mL), 40-100 °C, N<sub>2</sub>, and 12 h. The yields were determined by HPLC using pure **3a** as an external standard ( $t_R = 10.5$  min,  $\lambda_{max} = 252$  nm, water / methanol = 20 / 80 (v / v)).

**Table S8.** Base-mediated synthesis of **3a** from **1a** and **2ea** using different reactant molar ratios.<sup>a</sup>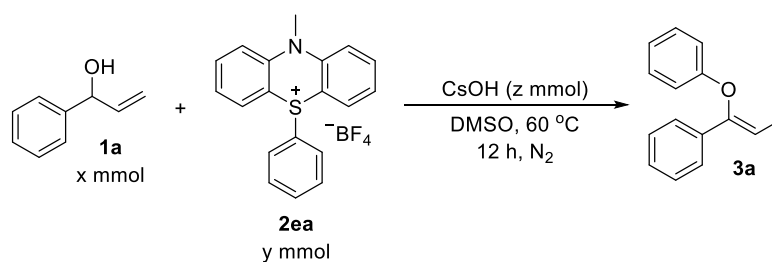

| Entry | x : y : z | Yield ( <b>3a</b> , %) |
|-------|-----------|------------------------|
| 1     | 1:1.2:1.2 | 79, 81 <sup>b</sup>    |
| 2     | 1:1.2:1.5 | 83, 86 <sup>b</sup>    |
| 3     | 1:1.5:1.5 | 81, 82 <sup>b</sup>    |
| 4     | 1:1.5:2   | 79, 80 <sup>b</sup>    |
| 5     | 1:2:2     | 75, 79 <sup>b</sup>    |

<sup>a</sup> Reaction conditions: **1a** (0.1 mmol), **2ea** (0.12, 0.15, or 0.2 mmol), CsOH (0.12,

0.15, or 0.2 mmol), DMSO (1 mL), 60 °C, N<sub>2</sub>, and 12 h. The yields were determined by HPLC using pure **3a** as an external standard ( $t_R = 10.5$  min,  $\lambda_{max} = 252$  nm, water / methanol = 20 / 80 (v / v)).<sup>b</sup> The reaction was run at 60 °C for 24 h.

### 3. Based-mediated synthesis of phenyl enol ethers (**3**) from diverse allylic alcohols (**1**) with [Ph<sub>3</sub>S][OTf] (**2a**)

**General procedure:** In a nitrogen-filled glovebox, a sealed tube was charge with **1** (0.1 or 0.2 mmol), triphenylsulfonium triflate (**2a**, 49.5 or 99 mg, 0.12 or 0.24 mmol), NaOH (4.8 or 9.6 mg, 0.12 or 0.24 mmol) or *t*-BuOK (13.5 mg, 0.12 mmol), and DMSO (1.0 or 2.0 mL) with vigorous stirring. The mixture was reacted at room temperature or 60 °C for 12 or 24 h, cooled to room temperature, diluted with water (30 mL), and extracted with ethyl acetate (3 × 20 mL). The combined organic layers were dried over anhydrous Na<sub>2</sub>SO<sub>4</sub> and concentrated to dryness under reduced pressure. The residue was purified by flash column chromatography on silica gel using a mixture of petroleum ether (PE) and ethyl acetate (EA) as eluents to give the desired product (**3**).

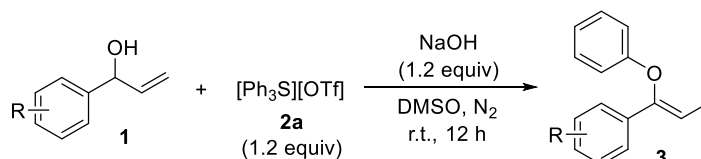

#### (*Z*)-(1-Phenoxyprop-1-en-1-yl)benzene (**3a**)<sup>8</sup>

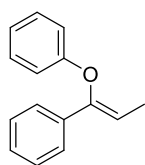

White solid (36.6 mg, 87%, eluents: PE), *Z/E* = 50/1. <sup>1</sup>H NMR (500 MHz, CDCl<sub>3</sub>)  $\delta$  7.50 (d,  $J = 7.5$  Hz, 2.04H), 7.29 (t,  $J = 7.5$ , 2.04H), 7.26-7.23 (m, 3.06H), 6.98 (d,  $J = 8.1$  Hz, 2.04H), 6.95 (t,  $J = 7.4$  Hz, 1.02H), 5.95 (q,  $J = 6.9$  Hz, 1H), 5.49 (q,  $J = 7.5$  Hz, 0.02H), 1.87 (d,  $J = 7.3$  Hz, 0.06H), 1.77 (d,  $J = 7.0$  Hz, 3H). <sup>13</sup>C NMR (126 MHz, CDCl<sub>3</sub>)  $\delta$  157.3, 149.7, 135.6, 129.5, 128.4, 127.7, 125.1, 121.3, 115.4, 112.4, 11.4.

#### (*Z*)-1-Methyl-4-(1-phenoxyprop-1-en-1-yl)benzene (**3b**)

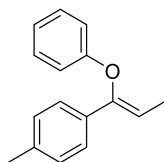

Colorless oil (18.4 mg, 82%, eluents: PE), *Z/E* = 25/1.  $^1\text{H}$  NMR (500 MHz,  $\text{CDCl}_3$ )  $\delta$  7.37 (d,  $J$  = 8.1 Hz, 2.08H), 7.23 (t,  $J$  = 7.9 Hz, 2.08H), 7.08 (d,  $J$  = 8.1 Hz, 2.08H), 6.96 (d,  $J$  = 8.2 Hz, 2.08H), 6.93 (t,  $J$  = 7.5 Hz, 1.04H), 5.89 (q,  $J$  = 6.9 Hz, 1H), 5.45 (q,  $J$  = 7.3 Hz, 0.04H), 2.33 (s, 0.12H), 2.30 (s, 3H), 1.86 (d,  $J$  = 7.4 Hz, 0.12H), 1.75 (d,  $J$  = 7.0 Hz, 3H).  $^{13}\text{C}$  NMR (126 MHz,  $\text{CDCl}_3$ )  $\delta$  157.4, 149.6, 137.6, 132.7, 129.5, 129.2, 125.1, 121.3, 115.4, 111.5, 21.2, 11.4. IR (KBr): 3029, 2919, 2858, 1661, 1596, 1512, 1490, 1455, 1314, 1267, 1220, 1186, 1164, 1074, 1028, 1014, 969, 888, 825, 793, 752, 690  $\text{cm}^{-1}$ . HRMS-ESI ( $m/z$ ) calcd. for  $[\text{C}_{16}\text{H}_{17}\text{O}]^+$  ( $[\text{M} + \text{H}]^+$ ): 225.1274; found: 225.1270.

(*Z*)-1-(*Tert*-butyl)-4-(1-phenoxyprop-1-en-1-yl)benzene (**3c**)

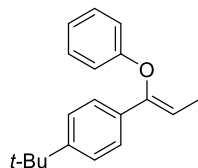

White solid (17.6 mg, 66%, eluents: PE/EA = 40/1), *Z/E* = 25/1. M.p.: 87-89  $^\circ\text{C}$ .  $^1\text{H}$  NMR (500 MHz,  $\text{CDCl}_3$ )  $\delta$  7.40 (d,  $J$  = 8.5 Hz, 2.08H), 7.29 (d,  $J$  = 8.5 Hz, 2.08H), 7.23 (t,  $J$  = 8.0 Hz, 2.08H), 6.97 (d,  $J$  = 8.1 Hz, 2.08H), 6.93 (t,  $J$  = 7.3 Hz, 1.04H), 5.90 (q,  $J$  = 7.0 Hz, 1H), 5.42 (q,  $J$  = 7.4 Hz, 0.04H), 1.86 (d,  $J$  = 7.3 Hz, 0.12H), 1.74 (d,  $J$  = 7.0 Hz, 3H), 1.28 (s, 9.36H).  $^{13}\text{C}$  NMR (126 MHz,  $\text{CDCl}_3$ )  $\delta$  157.4, 150.8, 149.6, 132.7, 129.5, 125.3, 124.8, 121.2, 115.3, 111.6, 34.5, 31.2, 11.4. IR (KBr): 3034, 2962, 2934, 2866, 1661, 1596, 1488, 1457, 1408, 1364, 1315, 1304, 1270, 1219, 1163, 1118, 1073, 1029, 1012, 966, 886, 847, 832, 811, 777, 750, 699  $\text{cm}^{-1}$ . HRMS-ESI ( $m/z$ ) calcd. for  $[\text{C}_{19}\text{H}_{23}\text{O}]^+$  ( $[\text{M} + \text{H}]^+$ ): 267.1743; found: 267.1738.

A mixture of (*Z*)-1-methoxy-4-(1-phenoxyprop-1-en-1-yl)benzene (**3d**) and 1-methoxy-4-(1-phenoxyallyl)benzene (**3d'**)<sup>9</sup>

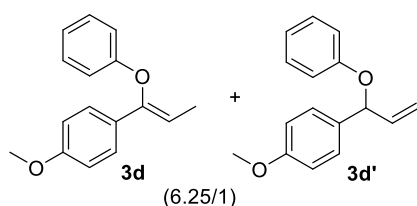



White solid (25.1 mg, 52%, eluents: PE/EA = 40/1).  $^1\text{H}$  NMR (500 MHz,  $\text{CDCl}_3$ )  $\delta$  7.43 (d,  $J = 8.8$  Hz, 2H), 7.36 (d,  $J = 8.6$  Hz, 0.32H), 7.26 (t,  $J = 8.0$  Hz, 2.32H), 6.99-6.95 (m, 3.32H), 6.94-6.91 (m, 0.48H), 6.83 (d,  $J = 8.8$  Hz, 2H), 6.16-6.09 (m, 0.16H), 5.82 (q,  $J = 6.9$  Hz, 1H), 5.63 (d,  $J = 5.7$  Hz, 0.16H), 5.35 (d,  $J = 17.2$  Hz, 0.16H), 5.27 (d,  $J = 10.4$  Hz, 0.16H), 3.82 (s, 0.48H), 3.79 (s, 3H), 1.76 (d,  $J = 6.9$  Hz, 3H).

(Z)-1-Methoxy-4-(1-phenoxyprop-1-en-1-yl)benzene (**3d**)

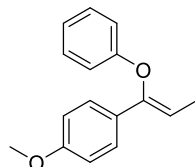

White solid (43.3 mg, 90%, eluents: PE/EA = 40/1),  $Z/E = 25/1$ . M.p.: 76-78 °C.  $^1\text{H}$  NMR (500 MHz,  $\text{CDCl}_3$ )  $\delta$  7.43 (d,  $J = 8.7$  Hz, 2.08H), 7.24 (t,  $J = 7.9$  Hz, 2.08H), 6.98 (d,  $J = 7.9$  Hz, 2.08H), 6.94 (t,  $J = 7.4$  Hz, 1.04H), 6.82 (d,  $J = 8.7$  Hz, 2.08H), 5.81 (q,  $J = 6.9$  Hz, 1H), 5.43 (q,  $J = 7.3$  Hz, 0.04H), 3.80 (s, 0.12H), 3.77 (s, 3H), 1.86 (d,  $J = 7.4$  Hz, 0.12H), 1.75 (d,  $J = 6.9$  Hz, 3H).  $^{13}\text{C}$  NMR (126 MHz,  $\text{CDCl}_3$ )  $\delta$  159.4, 157.4, 149.4, 129.5, 128.3, 126.5, 121.3, 115.4, 113.9, 110.4, 55.2, 11.3. IR (KBr): 3060, 3038, 2962, 2932, 2911, 2859, 2836, 1658, 1610, 1594, 1573, 1513, 1489, 1479, 1453, 1315, 1290, 1265, 1247, 1213, 1178, 1162, 1115, 1075, 1030, 968, 834, 790, 753, 691  $\text{cm}^{-1}$ . HRMS-ESI ( $m/z$ ) calcd. for  $[\text{C}_{16}\text{H}_{17}\text{O}]^+$  ( $[\text{M} + \text{H}]^+$ ): 241.1223; found: 241.1217.

(Z)-4-(1-Phenoxyprop-1-en-1-yl)-1,1'-biphenyl (**3e**)

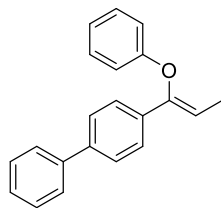

White solid (17.8 mg, 62%, eluents: PE/EA = 40/1),  $Z/E = 13/1$ . M.p.: 129-131 °C.  $^1\text{H}$  NMR (500 MHz,  $\text{CDCl}_3$ )  $\delta$  7.57-7.54 (m, 4.32H), 7.51 (d,  $J = 8.3$  Hz, 2.16H), 7.41 (t,  $J = 7.6$  Hz, 2.16H), 7.32 (t,  $J = 7.4$  Hz, 1.08H), 7.27-7.24 (m, 2.16H), 7.0 (d,  $J = 8.5$  Hz, 2.16H), 6.95 (t,  $J = 7.3$  Hz, 1.08H), 6.02 (q,  $J = 7.0$  Hz, 1H), 5.51 (q,  $J = 7.2$  Hz, 0.08H), 1.91 (d,  $J = 7.4$  Hz, 0.24H), 1.78 (d,  $J = 7.0$  Hz, 3H).  $^{13}\text{C}$  NMR (126 MHz,  $\text{CDCl}_3$ )  $\delta$  157.3, 149.4, 140.6, 140.5, 134.5, 129.6, 128.8, 127.3, 127.1, 126.9, 125.5, 121.4, 115.4, 112.5, 11.5. IR (KBr): 3054, 3028, 2962, 2912, 2853, 1651, 1596, 1488,

1449, 1405, 1261, 1225, 1166, 1158, 1075, 1028, 1012, 969, 879, 841, 813, 760, 748, 686  $\text{cm}^{-1}$ . HRMS-ESI ( $m/z$ ) calcd. for  $[\text{C}_{21}\text{H}_{19}\text{O}]^+$  ( $[\text{M} + \text{H}]^+$ ): 287.1430; found: 287.1425.

(Z)-1-Fluoro-4-(1-phenoxyprop-1-en-1-yl)benzene (**3f**)

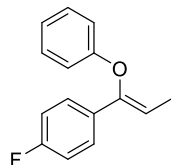

Light yellow oil (20.1 mg, 88%, eluents: PE/EA = 40/1),  $Z/E = 50/1$ .  $^1\text{H}$  NMR (500 MHz,  $\text{CDCl}_3$ )  $\delta$  7.44 (dd,  $J = 8.8$  Hz, 5.4 Hz, 2.04H), 7.24 (t,  $J = 8.0$  Hz, 2.04H), 6.98-6.93 (m, 5.10H), 5.85 (q,  $J = 7.0$  Hz, 1H), 5.45 (q,  $J = 7.5$  Hz, 0.02H), 1.83 (d,  $J = 7.4$  Hz, 0.06H), 1.75 (d,  $J = 7.0$  Hz, 3H).  $^{19}\text{F}$  NMR (471 MHz,  $\text{CDCl}_3$ )  $\delta$  -144.2 (m, 1F).  $^{13}\text{C}$  NMR (126 MHz,  $\text{CDCl}_3$ )  $\delta$  162.4 (d,  $J = 247.8$  Hz), 157.1, 148.8, 131.7 (d,  $J = 3.2$  Hz), 129.6, 126.9 (d,  $J = 8.1$  Hz), 121.5, 115.4, 115.3 (d,  $J = 21.7$  Hz), 112.1 (d,  $J = 1.5$  Hz), 11.4. IR (KBr): 3043, 2980, 2939, 1689, 1596, 1507, 1489, 1407, 1353, 1262, 1221, 1157, 1073, 1027, 1014, 954, 848, 800, 754, 692  $\text{cm}^{-1}$ . HRMS-ESI ( $m/z$ ) calcd. for  $[\text{C}_{15}\text{H}_{14}\text{FO}]^+$  ( $[\text{M} + \text{H}]^+$ ): 229.1023; found: 229.1019.

(Z)-1-Chloro-4-(1-phenoxyprop-1-en-1-yl)benzene (**3g**)

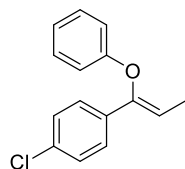

Colorless oil (42.0 mg, 90%, eluents: PE),  $Z/E = 100/1$ .  $^1\text{H}$  NMR (500 MHz,  $\text{CDCl}_3$ )  $\delta$  7.42(d,  $J = 8.6$  Hz, 2.02H), 7.27-7.23 (m, 4.04H), 6.98-6.94 (m, 3.03H), 5.93 (q,  $J = 7.0$  Hz, 1H), 5.49 (q,  $J = 7.3$  Hz, 0.01H), 1.84 (d,  $J = 7.4$  Hz, 0.03H), 1.77 (d,  $J = 7.0$  Hz, 3H).  $^{13}\text{C}$  NMR (126 MHz,  $\text{CDCl}_3$ )  $\delta$  157.0, 148.7, 134.1, 133.6, 129.6, 128.6, 126.4, 121.6, 115.3, 113.1, 11.4. IR (KBr): 3040, 2963, 1596, 1489, 1402, 1261, 1217, 1093, 1027, 971, 838, 799, 750, 689  $\text{cm}^{-1}$ . HRMS-ESI ( $m/z$ ) calcd. for  $[\text{C}_{15}\text{H}_{14}\text{ClO}]^+$  ( $[\text{M} + \text{H}]^+$ ): 245.0728; found: 245.0724.

(Z)-1-Bromo-4-(1-phenoxyprop-1-en-1-yl)benzene (**3h**)

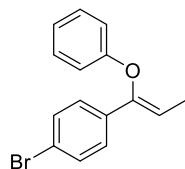

White solid (43.0 mg, 74%, eluents: PE), *Z/E* = 100/1. M.p.: 57-59 °C. <sup>1</sup>H NMR (500 MHz, CDCl<sub>3</sub>) δ 7.39 (d, *J* = 8.8 Hz, 2.02H), 7.34 (d, *J* = 8.5 Hz, 2.02H), 7.26-7.22 (m, 2.02H), 6.96-6.92 (m, 3.03H), 5.93 (q, *J* = 7.0 Hz, 1H), 5.49 (q, *J* = 7.4 Hz, 0.01H), 1.83 (d, *J* = 7.4 Hz, 0.03H), 1.75 (d, *J* = 7.0 Hz, 3H). <sup>13</sup>C NMR (126 MHz, CDCl<sub>3</sub>) δ 156.0, 147.8, 133.6, 130.6, 128.6, 125.7, 120.7, 120.6, 114.3, 112.1, 10.4. IR (KBr): 3072, 3037, 2962, 2922, 2855, 1657, 1594, 1487, 1454, 1397, 1311, 1261, 1220, 1185, 1158, 1112, 1072, 1025, 1007, 968, 885, 827, 810, 772, 748, 713 cm<sup>-1</sup>. HRMS-ESI (*m/z*) calcd. for [C<sub>15</sub>H<sub>14</sub>BrO]<sup>+</sup> ([M + H]<sup>+</sup>): 289.0223; found: 289.0217.

(*Z*)-1-Iodo-4-(1-phenoxyprop-1-en-1-yl)benzene (**3i**)

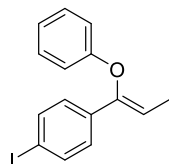

White solid (23.5 mg, 70%, eluents: PE), *Z/E* = 33/1. M.p.: 73-75 °C. <sup>1</sup>H NMR (500 MHz, CDCl<sub>3</sub>) δ 7.64 (d, *J* = 8.5 Hz, 2.06H), 7.30-7.24 (m, 4.12H), 7.0-6.96 (m, 3.09H), 5.99 (q, *J* = 6.9 Hz, 1H), 5.49 (q, *J* = 7.4 Hz, 0.03H), 1.84 (d, *J* = 7.4 Hz, 0.09H), 1.79 (d, *J* = 7.0 Hz, 3H). <sup>13</sup>C NMR (126 MHz, CDCl<sub>3</sub>) δ 157.0, 148.9, 137.6, 135.2, 129.6, 126.9, 121.6, 115.3, 113.2, 93.3, 11.4. IR (KBr): 3063, 3039, 2963, 2914, 2852, 1660, 1591, 1488, 1394, 1311, 1294, 1262, 1216, 1169, 1103, 1074, 1059, 1026, 1003, 967, 813, 749, 691 cm<sup>-1</sup>. HRMS-ESI (*m/z*) calcd. for [C<sub>15</sub>H<sub>14</sub>IO]<sup>+</sup> ([M + H]<sup>+</sup>): 337.0084; found: 337.0077.

(*Z*)-1-(1-Phenoxyprop-1-en-1-yl)-4-(trifluoromethyl)benzene (**3j**)

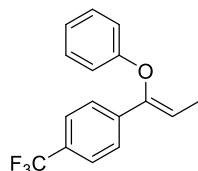

Colorless oil (11.7 mg, 21%, eluents: PE). <sup>1</sup>H NMR (500 MHz, CDCl<sub>3</sub>) δ 7.58 (d, *J* = 8.3 Hz, 2H), 7.52 (d, *J* = 8.3 Hz, 2H), 7.23 (d, *J* = 8.4 Hz, 2H), 6.97-6.93 (m, 3H), 6.06 (q, *J* = 7.0 Hz, 1H), 1.79 (d, *J* = 7.0 Hz, 3H). <sup>19</sup>F NMR (471 MHz, CDCl<sub>3</sub>) δ -

62.7 (s, 3F).  $^{13}\text{C}$  NMR (126 MHz,  $\text{CDCl}_3$ )  $\delta$  156.9, 148.6, 139.1, 129.7 (q,  $J = 32.2$  Hz), 129.7, 125.5 (q,  $J = 3.8$  Hz), 125.3, 124.1 (q,  $J = 272$  Hz), 121.8, 115.3, 115.0, 11.5. IR (KBr): 3063, 3043, 2921, 2858, 1659, 1618, 1596, 1490, 1411, 1328, 1287, 1264, 1218, 1166, 1125, 1070, 1029, 1015, 970, 850, 819, 787, 750, 733, 691  $\text{cm}^{-1}$ . HRMS-ESI (m/z) calcd. for  $[\text{C}_{16}\text{H}_{14}\text{F}_3\text{O}]^+$  ( $[\text{M} + \text{H}]^+$ ): 279.0991; found: 279.0986.

A mixture of (Z)-1-methoxy-3-(1-phenoxyprop-1-en-1-yl)benzene (**3m**) and 1-methoxy-3-(1-phenoxyallyl)benzene (**3m'**)<sup>10</sup>

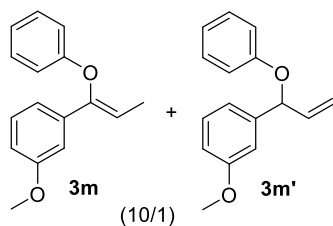

Colorless oil (42.8 mg, 89%, eluents: PE/EA = 40/1).  $^1\text{H}$  NMR (500 MHz,  $\text{CDCl}_3$ )  $\delta$  7.26-7.18 (m, 3.30H), 7.10 (d,  $J = 7.8$  Hz, 1.10H), 7.03 (s, 1.10H), 6.98-6.93 (m, 3.30H), 6.78 (dd,  $J = 7.9$  Hz, 2.1 Hz, 1.10H), 6.14-6.07 (m, 0.10H), 5.95 (q,  $J = 7.0$  Hz, 1H), 5.62 (d,  $J = 5.8$  Hz, 0.10H), 5.37 (d,  $J = 17.2$  Hz, 0.10H), 5.27 (d,  $J = 10.4$  Hz, 0.10H), 3.81 (s, 0.30H), 3.76 (s, 3H), 1.77 (d,  $J = 7.0$  Hz, 3H).

(Z)-1-Methoxy-3-(1-phenoxyprop-1-en-1-yl)benzene (**3m**)

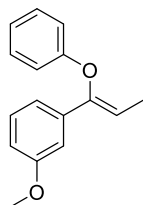

Colorless oil (43.7 mg, 91%, eluents: PE/EA = 40/1).  $Z/E = 25/1$ .  $^1\text{H}$  NMR (500 MHz,  $\text{CDCl}_3$ )  $\delta$  7.26-7.19 (m, 3.09H), 7.11 (d,  $J = 7.8$  Hz, 1.03H), 7.04 (s, 1.03H), 6.99-6.93 (m, 3.09H), 6.79 (dd,  $J = 8.1$  Hz, 1.8 Hz, 1.03H), 5.95 (q,  $J = 7.0$  Hz, 1H), 5.49 (q,  $J = 7.4$  Hz, 0.03H), 3.79 (s, 0.09H), 3.76 (s, 3H), 1.88 (d,  $J = 7.4$  Hz, 0.09H), 1.77 (d,  $J = 7.0$  Hz, 3H).  $^{13}\text{C}$  NMR (126 MHz,  $\text{CDCl}_3$ )  $\delta$  159.7, 157.3, 149.6, 137.1, 129.5, 129.4, 121.4, 117.8, 115.4, 113.3, 112.7, 110.9, 55.2, 11.4. IR (KBr): 3057, 3039, 3001, 2937, 2914, 2856, 2834, 1661, 1596, 1489, 1464, 1431, 1304, 1287, 1217, 1164, 1113, 1074, 1051, 1028, 985, 875, 780, 753, 690  $\text{cm}^{-1}$ . HRMS-ESI (m/z) calcd. for  $[\text{C}_{16}\text{H}_{17}\text{O}_2]^+$  ( $[\text{M} + \text{H}]^+$ ): 241.1223; found: 241.1219.

A mixture of (*Z*)-1-methoxy-2-(1-phenoxyprop-1-en-1-yl)benzene (**3n**) and 1-methoxy-2-(1-phenoxyallyl)benzene (**3n'**)<sup>9</sup>

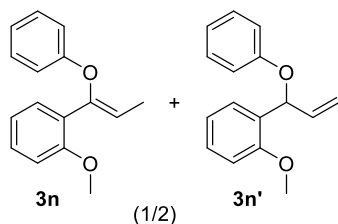

Colorless oil (38.9 mg, 81%, eluents: PE/EA = 40/1). <sup>1</sup>H NMR (500 MHz, CDCl<sub>3</sub>) δ 7.43 (dd, *J* = 7.6 Hz, 1.3 Hz, 1H), 7.38 (dd, *J* = 7.7 Hz, 1.4 Hz, 0.5H), 7.25-7.14 (m, 4.5H), 6.96-6.82 (m, 7.5H), 6.13-6.02 (m, 2.5H), 5.34 (dm, *J* = 17.0 Hz, 1H), 5.18 (dm, *J* = 9.4 Hz, 1H), 3.86 (s, 3H), 3.84 (s, 1.5H), 1.77 (d, *J* = 7.0 Hz, 1.5H). <sup>13</sup>C NMR (126 MHz, CDCl<sub>3</sub>) δ 158.0, 157.3, 157.2, 156.2, 146.3, 137.3, 129.3, 129.3, 128.9, 128.8, 128.7, 128.6, 127.2, 124.6, 121.2, 121.1, 120.7, 120.5, 116.5, 115.9, 115.8, 115.4, 111.2, 110.6, 74.0, 55.6, 55.5, 11.6. IR (KBr): 3066, 3038, 3008, 2938, 2837, 1643, 1597, 1492, 1464, 1437, 1339, 1289, 1239, 1165, 1097, 1028, 990, 929, 838, 752, 691 cm<sup>-1</sup>. HRMS-ESI (*m/z*) calcd. for [C<sub>16</sub>H<sub>16</sub>NaO<sub>2</sub>]<sup>+</sup> ([M + Na]<sup>+</sup>): 263.1043; found: 263.1053.

(*Z*)-5-(1-Phenoxyprop-1-en-1-yl)benzo[*d*][1,3]dioxole (**3o**)

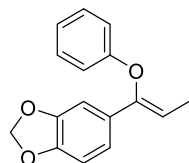

Colorless oil (20.0 mg, 79%, eluents: 20/1), *Z/E* = 20/1. <sup>1</sup>H NMR (500 MHz, CDCl<sub>3</sub>) δ 7.25-7.21 (m, 2.1H), 6.98-6.91 (m, 5.25H), 6.70 (d, *J* = 8.3 Hz, 1.05H), 5.91 (s, 2H), 5.93 (s, 0.1H), 5.76 (q, *J* = 7.0 Hz, 1H), 5.41 (q, *J* = 7.3 Hz, 0.05H), 1.83 (d, *J* = 7.3 Hz, 0.15H), 1.72 (d, *J* = 6.9 Hz, 3H). <sup>13</sup>C NMR (126 MHz, CDCl<sub>3</sub>) δ 157.2, 149.3, 147.8, 147.4, 130.0, 129.5, 121.4, 119.2, 115.4, 111.1, 108.2, 105.7, 101.1, 11.4. IR (KBr): 2895, 1659, 1596, 1490, 1443, 1350, 1296, 1251, 1171, 1096, 1040, 988, 936, 865, 811, 753, 691 cm<sup>-1</sup>. HRMS-ESI (*m/z*) calcd. for [C<sub>16</sub>H<sub>15</sub>O<sub>3</sub>]<sup>+</sup> ([M + H]<sup>+</sup>): 255.1016; found: 255.1012.

(*Z*)-2-(1-Phenoxyprop-1-en-1-yl)naphthalene (**3p**)

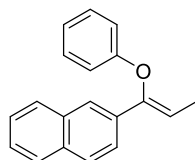

White solid (20.3 mg, 78%, eluents: PE/EA = 40/1), *Z/E* = 50/1. M.p.: 81-83 °C. <sup>1</sup>H NMR (500 MHz, CDCl<sub>3</sub>) δ 7.9 (s, 1.02H), 7.78-7.75 (m, 3.06H), 7.65 (dd, *J* = 8.7 Hz, 1.6 Hz, 1.02H), 7.43-7.41 (m, 2.04H), 7.24 (t, *J* = 8.0 Hz, 2.04H), 7.02 (d, *J* = 8.0 Hz, 2.04H), 6.94 (t, *J* = 7.3 Hz, 1.02H), 6.09 (q, *J* = 7.0 Hz, 1H), 5.59 (q, *J* = 7.4 Hz, 0.02H), 1.94 (d, *J* = 7.4 Hz, 0.06H), 1.82 (d, *J* = 7.0 Hz, 3H). <sup>13</sup>C NMR (126 MHz, CDCl<sub>3</sub>) δ 157.4, 149.8, 133.3, 133.0, 132.9, 129.6, 128.3, 128.1, 127.5, 126.2, 126.0, 124.1, 123.1, 121.4, 115.4, 113.0, 11.6. IR (KBr): 3056, 3038, 2931, 2912, 2853, 1650, 1595, 1489, 1350, 1302, 1219, 1192, 1164, 1131, 1073, 1026, 1012, 967, 896, 866, 816, 798, 760, 687 cm<sup>-1</sup>. HRMS-ESI (*m/z*) calcd. for [C<sub>19</sub>H<sub>17</sub>O]<sup>+</sup> ([M + H]<sup>+</sup>): 261.1274; found: 261.1270.

(*Z*)-2-(1-Phenoxyprop-1-en-1-yl)benzo[*b*]thiophene (**3q**)

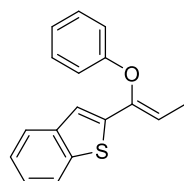

White solid (17.6 mg, 33%, eluents: PE/EA = 40/1), *Z/E* = 33/1. M.p.: 72-74 °C. <sup>1</sup>H NMR (500 MHz, CDCl<sub>3</sub>) δ 7.73-7.72 (m, 1.02H), 7.61-7.59 (m, 1.02H), 7.29-7.26 (m, 4.08H), 7.16 (s, 1.02H), 7.04 (d, *J* = 7.9 Hz, 2.04H), 6.98 (t, *J* = 7.3 Hz, 1.02H), 5.96 (q, *J* = 7.0 Hz, 1H), 5.62 (q, *J* = 7.7 Hz, 0.02H), 1.94 (d, *J* = 7.5 Hz, 0.06H), 1.77 (d, *J* = 7.0 Hz, 3H). <sup>13</sup>C NMR (126 MHz, CDCl<sub>3</sub>) δ 157.2, 145.3, 140.0, 139.3, 138.9, 129.6, 124.6, 124.4, 123.7, 122.0, 121.8, 120.7, 115.1, 115.0, 11.4. IR (KBr): 3061, 3026, 2962, 2924, 2853, 1650, 1595, 1521, 1489, 1455, 1433, 1380, 1331, 1314, 1298, 1261, 1217, 1165, 1150, 1096, 1074, 1025, 1010, 946, 863, 798, 752, 725, 687 cm<sup>-1</sup>. HRMS-ESI (*m/z*) calcd. for [C<sub>17</sub>H<sub>15</sub>OS]<sup>+</sup> ([M + H]<sup>+</sup>): 267.0838; found: 267.0833.

(*Z*)-2-(4-(1-Phenoxyprop-1-en-1-yl)phenyl)pyridine (**3r**)

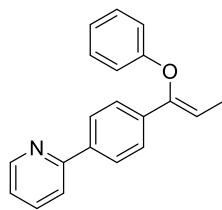

White solid (26.1 mg, 91%, eluents: PE/EA = 5/1), *Z/E* = 33/1. M.p.: 108-110 °C. <sup>1</sup>H NMR (500 MHz, CDCl<sub>3</sub>) δ 8.66 (d, *J* = 4.9 Hz, 1.03H), 7.91 (d, *J* = 8.5 Hz, 2.06H), 7.73-7.76 (m, 2.06H), 7.58 (d, *J* = 8.5 Hz, 2.06H), 7.24 (t, *J* = 8.0 Hz, 2.06H), 7.21-7.19 (m, 1.03H), 6.98 (d, *J* = 8.2 Hz, 2.06H), 6.94 (t, *J* = 7.4 Hz, 1.03H), 6.03 (q, *J* = 7.0 Hz, 1H), 5.55 (q, *J* = 7.5 Hz, 0.03H), 1.91 (d, *J* = 7.4 Hz, 0.09H), 1.79 (d, *J* = 7.0 Hz, 3H). <sup>13</sup>C NMR (126 MHz, CDCl<sub>3</sub>) δ 157.3, 156.9, 149.7, 149.4, 138.7, 136.7, 136.1, 129.5, 127.0, 125.5, 122.1, 121.4, 120.4, 115.4, 113.1, 11.5. IR (KBr): 3053, 3009, 2977, 2913, 2853, 1652, 1585, 1490, 1465, 1434, 1405, 1317, 1292, 1256, 1218, 1195, 1167, 1151, 1115, 1096, 1060, 1027, 966, 884, 841, 772, 752, 686 cm<sup>-1</sup>. HRMS-ESI (m/z) calcd. for [C<sub>20</sub>H<sub>18</sub>NO]<sup>+</sup> ([M + H]<sup>+</sup>): 288.1383; found: 288.1378.

(*Z*)-(1-Phenoxybut-1-en-1-yl)benzene (**3s**)<sup>8</sup>

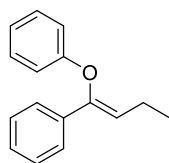

Colorless oil (23.8 mg, 53%, eluents: PE). <sup>1</sup>H NMR (500 MHz, CDCl<sub>3</sub>) δ 7.48 (d, *J* = 7.8 Hz, 2H), 7.27 (t, *J* = 7.4 Hz, 2H), 7.24-7.21 (m, 3H), 6.96 (d, *J* = 8.3 Hz, 2H), 6.92 (t, *J* = 7.5 Hz, 1H), 5.86 (t, *J* = 7.3 Hz, 1H), 2.22 (m, 2H), 1.04 (t, *J* = 7.5 Hz, 3H). <sup>13</sup>C NMR (126 MHz, CDCl<sub>3</sub>) δ 157.5, 148.4, 135.5, 129.5, 128.4, 127.8, 125.2, 121.3, 119.7, 115.4, 19.3, 13.8.

(*Z*)-(1-Phenoxyprop-1-ene-1,3-diyl)dibenzene (**3t**)

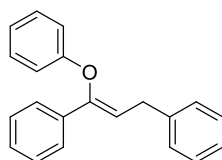

Colorless oil (16.2 mg, 28%, eluents: PE/EA = 40/1). <sup>1</sup>H NMR (500 MHz, CDCl<sub>3</sub>) δ 7.50 (d, *J* = 7.3 Hz, 2H), 7.29-7.18 (m, 10H), 6.99 (d, *J* = 7.9 Hz, 2H), 6.94 (t, *J* = 7.3 Hz, 1H), 6.01 (t, *J* = 7.4 Hz, 1H), 3.56 (d, *J* = 7.4 Hz, 2H). <sup>13</sup>C NMR (126 MHz, CDCl<sub>3</sub>) δ 157.4, 149.3, 140.4, 135.2, 129.6, 128.5, 128.5, 128.4, 128.1, 126.1, 125.5,

121.6, 116.6, 115.7, 32.3. IR (KBr): 3061, 3027, 2963, 2851, 1655, 1594, 1490, 1453, 1332, 1278, 1217, 1165, 1091, 1063, 1025, 1006, 992, 889, 868, 753, 691  $\text{cm}^{-1}$ . HRMS-ESI ( $m/z$ ) calcd. for  $[\text{C}_{21}\text{H}_{19}\text{O}]^+$  ( $[\text{M} + \text{H}]^+$ ): 287.1430; found: 287.1423.

(2-Phenoxybut-3-en-1-yl)benzene (**3u'**)<sup>11</sup>

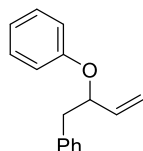

Colorless oil (23.3 mg, 52%, eluents: PE/EA = 40/1).  $^1\text{H}$  NMR (500 MHz,  $\text{CDCl}_3$ )  $\delta$  7.32-7.29 (m, 4H), 7.26-7.23 (m, 3H), 6.94-6.89 (m, 3H), 5.90 (m, 1H), 5.23 (d,  $J = 17.0$  Hz, 1H), 5.21 (d,  $J = 10.4$  Hz, 1H), 4.83 (q,  $J = 6.2$  Hz, 1H), 3.16 (dd,  $J = 13.8$  Hz, 7.1 Hz, 1H), 2.97 (dd,  $J = 13.8$  Hz, 5.9 Hz, 1H).  $^{13}\text{C}$  NMR (126 MHz,  $\text{CDCl}_3$ )  $\delta$  158.2, 137.7, 137.4, 129.7, 129.3, 128.2, 126.4, 120.9, 116.8, 116.2, 79.9, 42.2.

#### 4. Base-mediated synthesis of aryl enol ethers from 1-phenylprop-2-en-1-ol (**1a**) with different arylsulfonium salts

##### 4.1. Procedures for the synthesis of arylsulfonium salts.

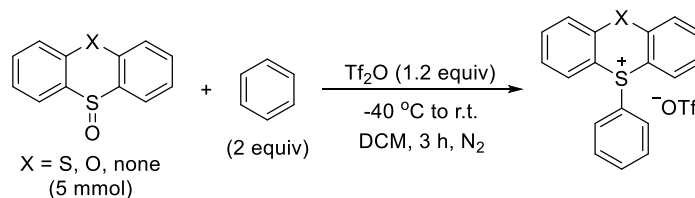

**Procedure A:**<sup>12</sup> Under a  $\text{N}_2$  atmosphere,  $\text{Tf}_2\text{O}$  (1.0 mL, 6 mmol) was added to a mixture of benzene (0.781 g, 10 mmol), sulfoxide (5 mmol), and DCM (20 mL) at  $-40$   $^\circ\text{C}$  with stirring. The mixture was reacted at room temperature for 3 h and neutralized by a saturated aqueous  $\text{NaHCO}_3$  solution. The DCM layer was collected. The aqueous solution was extracted with DCM ( $3 \times 20$  mL). The combined organic layers were dried over anhydrous  $\text{Na}_2\text{SO}_4$  and concentrated to dryness under reduced pressure. The residue was crystallized from a mixture of DCM / *tert*-butyl methyl ether = 1/20 (v/v) to afford the desired product (**2b-d**).



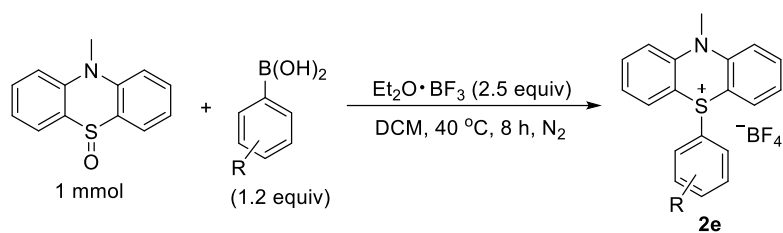

**Procedure B:**<sup>4</sup> Under a  $\text{N}_2$  atmosphere, a flask was charged with  $\text{Et}_2\text{O}\cdot\text{BF}_3$  (0.34 mL, 2.5 mmol), 10-methyl-10H-phenothiazine 5-oxide (229 mg, 1 mmol), aryl boronic acid (1.2 mmol), and DCM (10 mL) with stirring. The mixture was reacted at  $40\text{ }^\circ\text{C}$  for 8 h. Then, 2-(bis(2-hydroxyethyl)amino)-2-(hydroxymethyl)propane-1,3-diol (Bis-Tris, 2.1 g, 10 mmol) and a saturated aqueous  $\text{NaBF}_4$  solution (10 mL) were added to the DCM solution. After shaking for at least 5 min, the DCM layer was collected. The aqueous solution was extracted with DCM ( $3 \times 15\text{ mL}$ ). The combined organic layers were dried over anhydrous  $\text{Na}_2\text{SO}_4$  and concentrated to dryness under reduced pressure. The residue was crystallized from a mixture of DCM / *tert*-butyl methyl ether = 1/20 (v/v) to afford the desired arylsulfonium salts (**2ea-ec**, **2ei**, and **2ek-eo**).

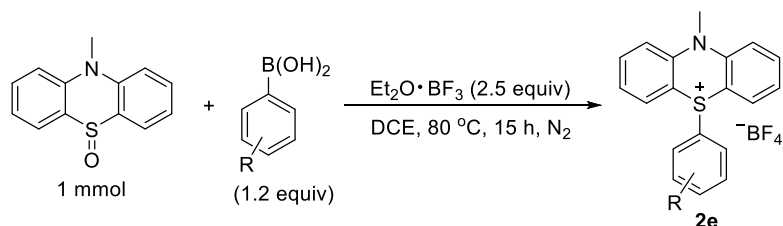

**Procedure C:**<sup>4</sup> Under a  $\text{N}_2$  atmosphere, a flask was charged with 10-methyl-10H-phenothiazine 5-oxide (229 mg, 1 mmol), aryl boronic acid (1.2 mmol),  $\text{Et}_2\text{O}\cdot\text{BF}_3$  (0.34 mL, 2.5 mmol), and DCE (10 mL) with stirring. The mixture was reacted at  $80\text{ }^\circ\text{C}$  for 15 h, quenched by moisture, concentrated under reduced pressure, and diluted with DCM (10 mL). Then, Bis-Tris (2.1 g, 10 mmol) and a saturated aqueous  $\text{NaBF}_4$  solution (10 mL) were added to the DCM solution. After shaking for at least 5 min, the DCM layer was collected. The aqueous layer was extracted with DCM ( $3 \times 15\text{ mL}$ ). The combined organic layers were dried over anhydrous  $\text{Na}_2\text{SO}_4$  and concentrated to dryness under reduced pressure. The residue was crystallized from a mixture of DCM / *tert*-butyl methyl ether = 1/20 (v/v) to afford the desired arylsulfonium salts (**2ed-eh** and **2ej**).

5-(4-(*Tert*-butyl)phenyl)-10-methyl-5,10-dihydrophenothiazin-5-ium tetrafluoroborate

**(2ec)**

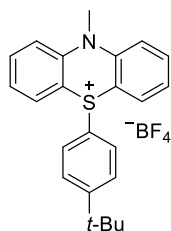

Light yellow solid (370.7 mg, 86%). M.p.: 280-282 °C.  $^1\text{H}$  NMR (500 MHz,  $\text{CDCl}_3$ )  $\delta$  8.09 (d,  $J = 7.9$  Hz, 2H), 7.79 (t,  $J = 7.9$  Hz, 2H), 7.53 (d,  $J = 8.5$  Hz, 2H), 7.43 (d,  $J = 8.7$  Hz, 2H), 7.37 (t,  $J = 7.6$  Hz, 2H), 7.20 (d,  $J = 8.7$  Hz, 2H), 3.71 (s, 3H), 1.19 (s, 9H).  $^{19}\text{F}$  NMR (471 MHz,  $\text{CDCl}_3$ )  $\delta$  -151.7 (brs), -151.7 (brs).  $^{13}\text{C}$  NMR (126 MHz,  $\text{CDCl}_3$ )  $\delta$  157.5, 143.2, 136.0, 132.2, 128.3, 127.2, 125.7, 124.7, 117.6, 105.2, 36.0, 35.2, 30.8. IR (KBr): 3065, 2965, 2907, 2871, 1583, 1465, 1400, 1353, 1301, 1259, 1177, 1054, 877, 836, 768  $\text{cm}^{-1}$ . HRMS-ESI ( $m/z$ ) calcd. for  $[\text{C}_{23}\text{H}_{24}\text{NS}]^+$  ( $[\text{M}]^+$ ): 346.1624; found: 346.1619.

5-(4-(Methoxycarbonyl)phenyl)-10-methyl-5,10-dihydrophenothiazin-5-ium tetrafluoroborate (**2eg**)

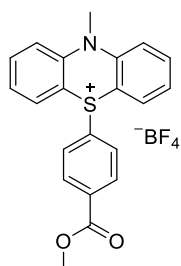

Grey solid (233.8 mg, 54%). M.p.: 229-231 °C.  $^1\text{H}$  NMR (500 MHz,  $\text{CDCl}_3$ )  $\delta$  8.35 (d,  $J = 8.0$  Hz, 2H), 8.05 (d,  $J = 8.4$  Hz, 2H), 7.87 (t,  $J = 7.9$  Hz, 2H), 7.52 (t,  $J = 7.6$  Hz, 2H), 7.48 (d,  $J = 8.5$  Hz, 2H), 7.28 (d,  $J = 7.1$  Hz, 2H), 3.90 (s, 3H), 3.66 (s, 3H).  $^{19}\text{F}$  NMR (471 MHz,  $\text{CD}_3\text{CN}$ )  $\delta$  -151.5 (brs), -151.6 (brs).  $^{13}\text{C}$  NMR (126 MHz,  $\text{CD}_3\text{CN}$ )  $\delta$  165.1, 143.4, 136.1, 134.2, 134.0, 132.3, 131.1, 127.3, 124.5, 118.1, 104.4, 52.4, 35.7. IR (KBr): 3102, 3077, 2959, 2929, 2851, 1722, 1580, 1463, 1439, 1397, 1351, 1292, 1262, 1154, 1088, 1052, 1009, 956, 878, 756, 684  $\text{cm}^{-1}$ . HRMS-ESI ( $m/z$ ) calcd. for  $[\text{C}_{21}\text{H}_{18}\text{NO}_2\text{S}]^+$  ( $[\text{M}]^+$ ): 348.1053; found: 348.1046.

5-(4-Acetylphenyl)-10-methyl-5,10-dihydrophenothiazin-5-ium tetrafluoroborate (**2eh**)

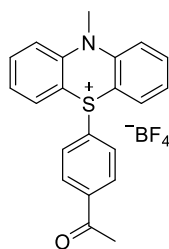

Yellow solid (272.4 mg, 65%). M.p.: 177-179 °C.  $^1\text{H}$  NMR (500 MHz,  $\text{CDCl}_3$ )  $\delta$  8.31 (d,  $J = 7.8$  Hz, 2H), 7.91 (d,  $J = 8.5$  Hz, 2H), 7.82 (t,  $J = 8.1$  Hz, 2H), 7.47-7.43 (m, 4H), 7.30 (d,  $J = 8.5$  Hz, 2H), 3.63 (s, 3H), 2.51 (s, 3H).  $^{19}\text{F}$  NMR (471 MHz,  $\text{CDCl}_3$ )  $\delta$  -151.0 (brs), -151.1 (brs).  $^{13}\text{C}$  NMR (126 MHz,  $\text{CDCl}_3$ )  $\delta$  196.4, 143.2, 140.1, 136.2, 133.6, 132.9, 130.2, 127.5, 125.0, 117.3, 104.9, 35.9, 26.7. IR (KBr): 3114, 3068, 2926, 2855, 1686, 1582, 1463, 1395, 1348, 1260, 1141, 1057, 1005, 959, 831, 762  $\text{cm}^{-1}$ . HRMS-ESI (m/z) calcd. for  $[\text{C}_{21}\text{H}_{18}\text{NOS}]^+$  ( $[\text{M}]^+$ ): 332.1104; found: 332.1098.

5-(4-(Diphenylamino)phenyl)-10-methyl-5,10-dihydrophenothiazin-5-ium tetrafluoroborate (**2ej**)

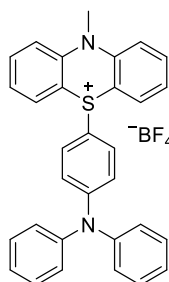

Yellowish solid (283.2 mg, 52%). M.p.: 180-182 °C.  $^1\text{H}$  NMR (500 MHz,  $\text{CDCl}_3$ )  $\delta$  8.00 (d,  $J = 7.9$  Hz, 2H), 7.74 (t,  $J = 7.9$  Hz, 2H), 7.50 (d,  $J = 8.5$  Hz, 2H), 7.31 (t,  $J = 7.6$  Hz, 2H), 7.26 (t,  $J = 7.7$  Hz, 4H), 7.13-7.09 (m, 4H), 7.03 (d,  $J = 7.5$  Hz, 4H), 6.82 (d,  $J = 9.1$  Hz, 2H), 3.71 (s, 3H).  $^{19}\text{F}$  NMR (471 MHz,  $\text{CDCl}_3$ )  $\delta$  -151.8 (brs), -151.9 (brs).  $^{13}\text{C}$  NMR (126 MHz,  $\text{CDCl}_3$ )  $\delta$  152.7, 145.2, 143.0, 135.7, 131.9, 130.0, 129.3, 126.5, 125.9, 124.6, 120.1, 117.5, 116.9, 106.4, 36.0. IR (KBr): 3063, 3034, 2927, 1577, 1491, 1466, 1334, 1299, 1261, 1196, 1141, 1061, 878, 820, 755, 700  $\text{cm}^{-1}$ . HRMS-ESI (m/z) calcd. for  $[\text{C}_{31}\text{H}_{25}\text{N}_2\text{S}]^+$  ( $[\text{M}]^+$ ): 457.1733; found: 457.1726.

5-(3,5-Dimethylphenyl)-10-methyl-5,10-dihydrophenothiazin-5-ium tetrafluoroborate (**2en**)

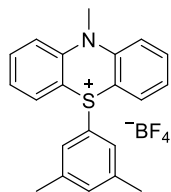

Light yellow solid (364.7 mg, 90%). M.p.: 272-274 °C.  $^1\text{H}$  NMR (500 MHz,  $\text{CDCl}_3$ )  $\delta$  8.12 (dd,  $J = 7.9$  Hz, 1.1 Hz, 2H), 7.81 (t,  $J = 7.9$  Hz, 2H), 7.52 (d,  $J = 8.4$  Hz, 2H), 7.41 (t,  $J = 7.4$  Hz, 2H), 7.09 (s, 1H), 6.78 (s, 2H), 3.70 (s, 3H), 2.23 (s, 6H).  $^{19}\text{F}$  NMR (471 MHz,  $\text{CDCl}_3$ )  $\delta$  -151.8 (brs), -151.8 (brs).  $^{13}\text{C}$  NMR (126 MHz,  $\text{CDCl}_3$ )  $\delta$  143.2, 141.4, 136.0, 135.1, 132.4, 128.8, 124.8, 124.4, 117.4, 105.2, 35.9, 21.3. IR (KBr): 3070, 3049, 2922, 1606, 1584, 1467, 1356, 1303, 1259, 1182, 1067, 942, 877, 766, 677  $\text{cm}^{-1}$ . HRMS-ESI ( $m/z$ ) calcd. for  $[\text{C}_{21}\text{H}_{20}\text{NS}]^+$  ( $[\text{M}]^+$ ): 318.1311; found: 318.1305.

#### 4.2. General procedure for the base-mediated synthesis of aryl enol ethers from **1a** with different types of aryl transfer reagents (**2**).

In a nitrogen-filled glovebox, a sealed tube was charge with **1a** (13.4 mg, 0.1 mmol), aryl transfer reagent (**2**, 0.12 mmol), NaOH (4.8 mg, 0.12 mmol), and DMSO (1 mL) with vigorous stirring. The mixture was reacted at room temperature for 12 h. The yields of **3a** were determined by HPLC using the pure **3a** as an external standard ( $t_{\text{R}} = 10.5$  min,  $\lambda_{\text{max}} = 252$  nm, water / methanol = 20 / 80 (v / v)). Product **4** was isolated by the flash column chromatography on silica gel using a mixture of petroleum ether (PE) and ethyl acetate (EA) as eluents.

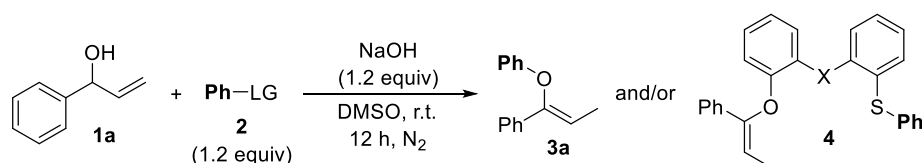

#### (*Z*)-Phenyl(2-((2-((1-phenylprop-1-en-1-yl)oxy)phenyl)thio)phenyl)sulfane (**4a**)

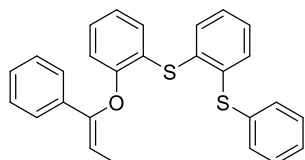

Light yellow oil (17.9 mg, 42%, eluents: PE/EA = 40/1),  $Z/E = 25/1$ .  $^1\text{H}$  NMR (500 MHz,  $\text{CDCl}_3$ )  $\delta$  7.42 (d,  $J = 6.6$  Hz, 2.08H), 7.39 (d,  $J = 7.4$  Hz, 2.08H), 7.29-7.26 (m, 3.12H), 7.23-7.21 (m, 6.24H), 7.15 (td,  $J = 6.9$  Hz, 1.9 Hz, 2.08H), 7.11 (tm,  $J = 7.9$

Hz, 1.04H), 6.91 (t,  $J = 7.4$  Hz, 1.04H), 6.80 (d,  $J = 8.1$  Hz Hz, 1.04H), 5.91 (q,  $J = 6.9$  Hz, 1H), 5.40 (q,  $J = 7.4$  Hz, 0.04H), 1.84 (d,  $J = 7.4$  Hz, 0.12H), 1.67 (d,  $J = 7.0$  Hz, 3H).  $^{13}\text{C}$  NMR (126 MHz,  $\text{CDCl}_3$ )  $\delta$  156.0, 149.8, 137.7, 137.0, 135.1, 135.1, 133.6, 132.2, 131.3, 131.3, 129.2, 129.2, 128.4, 127.8, 127.6, 127.3, 127.1, 125.2, 122.2, 122.0, 114.1, 112.6, 11.3. IR (KBr): 3056, 2963, 2921, 2854, 1660, 1573, 1468, 1442, 1261, 1226, 1157, 1099, 1035, 1015, 802, 749, 691  $\text{cm}^{-1}$ . HRMS-ESI ( $m/z$ ) calcd. for  $[\text{C}_{27}\text{H}_{23}\text{OS}_2]^+$  ( $[\text{M} + \text{H}]^+$ ): 427.1185; found: 427.1180.

(*Z*)-Phenyl(2-(2-((1-phenylprop-1-en-1-yl)oxy)phenoxy)phenyl)sulfane (**4b**)

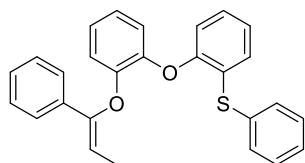

Light yellow oil (14.0 mg, 34%, eluents: PE/EA = 40/1),  $Z/E = 33/1$ .  $^1\text{H}$  NMR (500 MHz,  $\text{CDCl}_3$ )  $\delta$  7.44-7.40 (m, 4.12H), 7.27-7.24 (m, 4.12H), 7.22-7.19 (m, 4.12H), 7.00 (t,  $J = 7.5$  Hz, 1.03H), 6.96 (dd,  $J = 7.8$  Hz, 1.5 Hz, 1.03H), 6.93 (td,  $J = 7.1$  Hz, 1.5 Hz, 1.03H), 6.89-6.86 (m, 2.06H), 6.83 (dd,  $J = 8.0$  Hz, 1.3 Hz, 1.03H), 5.85 (q,  $J = 6.9$  Hz, 1H), 5.29 (q,  $J = 7.4$  Hz, 0.03H), 1.77 (d,  $J = 7.4$  Hz, 0.09H), 1.67 (d,  $J = 6.9$  Hz, 3H).  $^{13}\text{C}$  NMR (126 MHz,  $\text{CDCl}_3$ )  $\delta$  156.3, 149.7, 148.4, 144.7, 135.3, 135.0, 132.8, 131.4, 129.0, 128.3, 127.8, 126.9, 125.9, 125.3, 124.7, 123.3, 121.8, 121.2, 117.0, 115.6, 112.5, 11.3. IR (KBr): 3060, 2923, 2855, 1663, 1574, 1492, 1468, 1440, 1304, 1260, 1214, 1188, 1157, 1108, 1063, 1014, 931, 796, 748, 692  $\text{cm}^{-1}$ . HRMS-ESI ( $m/z$ ) calcd. for  $[\text{C}_{27}\text{H}_{23}\text{O}_2\text{S}]^+$  ( $[\text{M} + \text{H}]^+$ ): 411.1413; found: 411.1405.

(*Z*)-Phenyl(2'-((1-phenylprop-1-en-1-yl)oxy)-[1,1'-biphenyl]-2-yl)sulfane (**4c**)

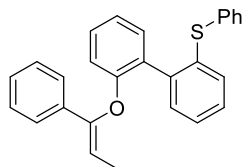

Light yellow oil (31.6 mg, 80%, eluents: PE/EA = 40/1),  $Z/E = 25/1$ .  $^1\text{H}$  NMR (500 MHz,  $\text{CDCl}_3$ )  $\delta$  7.45 (d,  $J = 6.7$  Hz, 2.08H), 7.43 (d,  $J = 7.4$  Hz, 1.04H), 7.36 (d,  $J = 7.1$  Hz, 2.08H), 7.34-7.31 (m, 2.08H), 7.29-7.27 (m, 3.12H), 7.23-7.17 (m, 6.24H), 6.98 (t,  $J = 7.4$  Hz, 1.04H), 6.85 (d,  $J = 8.3$  Hz, 1.04H), 5.91 (q,  $J = 6.9$  Hz, 1H), 5.25 (q,  $J = 7.4$  Hz, 0.04H), 1.74 (d,  $J = 6.9$  Hz, 3H).  $^{13}\text{C}$  NMR (126 MHz,  $\text{CDCl}_3$ )  $\delta$  154.1, 149.7, 139.8, 136.7, 136.2, 135.5, 131.8, 131.4, 130.9, 130.7, 129.4, 129.1, 128.3,

128.2, 127.7, 127.0, 126.4, 125.1, 120.9, 113.4, 112.4, 11.5. IR (KBr): 3057, 3024, 2916, 2854, 1659, 1581, 1493, 1462, 1442, 1316, 1262, 1214, 1158, 1117, 1072, 1016, 967, 909, 817, 742, 692  $\text{cm}^{-1}$ . HRMS-ESI ( $m/z$ ) calcd. for  $[\text{C}_{27}\text{H}_{23}\text{OS}]^+$  ( $[\text{M} + \text{H}]^+$ ): 395.1464; found: 395.1457.

#### 4.3. General procedure for the base-mediated synthesis of aryl enol ethers from **1a** with different aryl phenothiazinium salts (**2e**).

In a nitrogen-filled glovebox, a sealed tube was charge with **1a** (13.4 or 26.8 mg, 0.1 or 0.2 mmol), aryl phenothiazinium salt (**2e**, 0.12 or 0.24 mmol), NaOH (4.8 or 9.6 mg, 0.12 or 0.24 mmol) or CsOH (22.5 or 45 mg, 0.15 or 0.3 mmol) and DMSO (1 or 2 mL) with vigorous stirring. The mixture was reacted at room temperature or 60 °C for 12 or 24 h, cooled to room temperature, diluted with water (30 mL), and extracted with ethyl acetate ( $3 \times 20$  mL). The combined organic layers were dried over anhydrous  $\text{Na}_2\text{SO}_4$  and concentrated to dryness under reduced pressure. The residue was purified by flash column chromatography on silica gel using a mixture of petroleum ether (PE) and ethyl acetate (EA) as eluents to give the desired product (**5**).

#### (*Z*)-1-Methyl-4-((1-phenylprop-1-en-1-yl)oxy)benzene (**5a**)

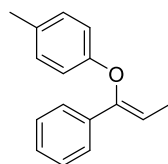

Light yellow oil (20.7 mg, 46%, eluents: PE/EA = 40/1),  $Z/E = 100/1$ .  $^1\text{H}$  NMR (500 MHz,  $\text{CDCl}_3$ )  $\delta$  7.47 (d,  $J = 7.4$  Hz, 2.02H), 7.27 (t,  $J = 7.7$  Hz, 2.02H), 7.21 (t,  $J = 7.3$  Hz, 1.01H), 7.02 (d,  $J = 8.2$  Hz, 2.02H), 6.85 (d,  $J = 8.5$  Hz, 2.02H), 5.91 (q,  $J = 7.0$  Hz, 1H), 5.40 (q,  $J = 7.4$  Hz, 0.01H), 2.25 (s, 3H), 2.13 (s, 0.03H), 1.83 (d,  $J = 7.4$  Hz, 0.03H), 1.76 (d,  $J = 7.0$  Hz, 3H).  $^{13}\text{C}$  NMR (126 MHz,  $\text{CDCl}_3$ )  $\delta$  155.2, 149.8, 135.7, 130.5, 130.0, 128.4, 127.7, 125.2, 115.1, 112.2, 20.5, 11.4. IR (KBr): 3057, 3031, 2920, 2858, 1660, 1610, 1506, 1446, 1317, 1285, 1263, 1220, 1167, 1105, 1018, 968, 815, 774, 732, 692  $\text{cm}^{-1}$ . HRMS-ESI ( $m/z$ ) calcd. for  $[\text{C}_{16}\text{H}_{17}\text{O}]^+$  ( $[\text{M} + \text{H}]^+$ ): 225.1274; found: 225.1269.

#### (*Z*)-*N*-Methyl-2-((1-phenylprop-1-en-1-yl)oxy)-*N*-(2-(*p*-tolylthio)phenyl)aniline (**4d**)

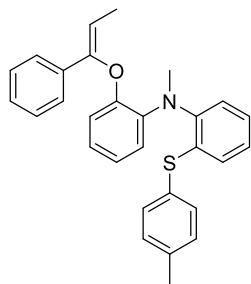

Colorless oil (18.4 mg, 21%, eluents: PE/EA = 40/1), *Z/E* = 10/1.  $^1\text{H}$  NMR (500 MHz,  $\text{CDCl}_3$ )  $\delta$  7.42-7.40 (m, 2.2H), 7.31 (d,  $J$  = 8.0 Hz, 2.2H), 7.16-7.15 (m, 3.3H), 7.12-7.09 (m, 4.4H), 6.98 (dd,  $J$  = 7.8 Hz, 1.4 Hz, 1.1H), 6.93 (tm,  $J$  = 7.9 Hz, 1.1H), 6.89-6.84 (m, 2.2H), 6.79 (tm,  $J$  = 7.9 Hz, 1.1H), 6.67 (dd,  $J$  = 8.0 Hz, 1.2 Hz, 1.1H), 5.82 (q,  $J$  = 6.9 Hz, 1H), 5.20 (q,  $J$  = 7.3 Hz, 0.1H), 3.38 (s, 3H), 3.29 (s, 0.3H), 2.34 (s, 0.3H), 2.33 (s, 3H), 1.74 (d,  $J$  = 7.4 Hz, 0.3H), 1.56 (d,  $J$  = 6.7 Hz, 3H).  $^{13}\text{C}$  NMR (126 MHz,  $\text{CDCl}_3$ )  $\delta$  149.6, 149.6, 148.9, 139.3, 137.7, 135.6, 135.3, 133.9, 131.1, 130.0, 129.4, 128.2, 127.6, 126.0, 125.3, 124.4, 123.5, 122.6, 121.2, 120.9, 113.9, 112.2, 41.0, 21.1, 11.2. IR (KBr): 3057, 3026, 2920, 2854, 2802, 1659, 1580, 1494, 1471, 1445, 1317, 1260, 1216, 1122, 1104, 1051, 1016, 968, 874, 811, 747, 693  $\text{cm}^{-1}$ . HRMS-ESI ( $m/z$ ) calcd. for  $[\text{C}_{29}\text{H}_{28}\text{NOS}]^+$  ( $[\text{M} + \text{H}]^+$ ): 438.1886; found: 438.1894.

(*Z*)-1-(*Tert*-butyl)-4-((1-phenylprop-1-en-1-yl)oxy)benzene (**5b**)

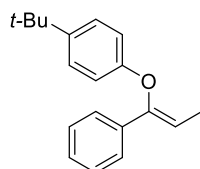

Colorless oil (18.1 mg, 34%, eluents: PE/EA = 40/1), *Z/E* = 50/1.  $^1\text{H}$  NMR (500 MHz,  $\text{CDCl}_3$ )  $\delta$  7.46 (d,  $J$  = 7.4 Hz, 2.04H), 7.24 (d,  $J$  = 8.5 Hz, 2.04H), 7.21-7.17 (m, 3.06H), 6.85 (d,  $J$  = 8.5 Hz, 2.04H), 5.89 (q,  $J$  = 6.9 Hz, 1H), 1.81 (d,  $J$  = 7.3 Hz, 0.06H), 1.73 (d,  $J$  = 7.0 Hz, 3H), 1.36 (s, 0.18H), 1.24 (s, 9H).  $^{13}\text{C}$  NMR (126 MHz,  $\text{CDCl}_3$ )  $\delta$  155.0, 149.8, 143.9, 135.8, 128.4, 127.7, 126.3, 125.2, 114.7, 112.3, 34.1, 31.5, 11.4. IR (KBr): 3057, 3034, 2914, 2855, 1661, 1582, 1479, 1446, 1398, 1315, 1276, 1264, 1226, 1167, 1109, 1057, 1014, 1003, 968, 913, 820, 748, 692  $\text{cm}^{-1}$ . HRMS-ESI ( $m/z$ ) calcd. for  $[\text{C}_{19}\text{H}_{23}\text{O}]^+$  ( $[\text{M} + \text{H}]^+$ ): 267.1743; found: 267.1739.

(*Z*)-2-((4-(*Tert*-butyl)phenyl)thio)-*N*-methyl-*N*-(2-((1-phenylprop-1-en-1-yl)oxy)phenyl)aniline (**4e**)

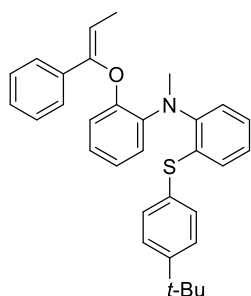

Colorless oil (30.7 mg, 32%, eluents: PE/EA = 40/1), *Z/E* = 50/1.  $^1\text{H}$  NMR (500 MHz,  $\text{CDCl}_3$ )  $\delta$  7.41-7.39 (m, 2.04), 7.33 (d,  $J$  = 8.6 Hz, 2.04H), 7.30 (d,  $J$  = 8.6 Hz, 2.04H), 7.17-7.16 (m, 3.06H), 7.13 (m, 2.04H), 6.99 (dd,  $J$  = 7.8 Hz, 1.2 Hz, 1.02H), 6.95 (m, 2.04H), 6.86 (td,  $J$  = 7.7 Hz, 1.1 Hz, 1.02H), 6.79 (tm,  $J$  = 7.9 Hz, 1.02H), 6.67 (dd,  $J$  = 8.0 Hz, 1.1 Hz, 1.02H), 5.82 (q,  $J$  = 6.9 Hz, 1H), 5.22 (q,  $J$  = 7.4 Hz, 0.02H), 3.39 (s, 3H), 3.31 (s, 0.06H), 1.76 (d,  $J$  = 7.4 Hz, 0.06H), 1.56 (d,  $J$  = 7.0 Hz, 3H), 1.31 (s, 9H), 1.28 (s, 0.18H).  $^{13}\text{C}$  NMR (126 MHz,  $\text{CDCl}_3$ )  $\delta$  150.7, 149.6, 149.6, 149.1, 139.3, 135.6, 134.9, 133.2, 131.2, 129.8, 128.2, 127.6, 126.2, 125.2, 124.4, 123.6, 122.6, 121.2, 120.8, 113.9, 112.2, 41.2, 34.6, 31.3, 11.2. IR (KBr): 3059, 2963, 2870, 2805, 1688, 1582, 1493, 1471, 1362, 1351, 1268, 1221, 1181, 1118, 1046, 1027, 1014, 951, 831, 814, 746, 691  $\text{cm}^{-1}$ . HRMS-ESI ( $m/z$ ) calcd. for  $[\text{C}_{32}\text{H}_{34}\text{NOS}]^+$  ( $[\text{M} + \text{H}]^+$ ): 480.2356; found: 480.2362.

(*Z*)-1-Chloro-4-((1-phenylprop-1-en-1-yl)oxy)benzene (**5c**)

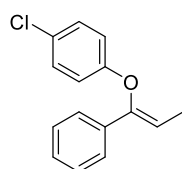

Light yellow oil (18.4 mg, 75%, eluents: PE/EA = 40/1), *Z/E* = 100/1.  $^1\text{H}$  NMR (500 MHz,  $\text{CDCl}_3$ )  $\delta$  7.44 (d,  $J$  = 7.2 Hz, 2.02H), 7.28 (t,  $J$  = 7.4 Hz, 2.02H), 7.23 (t,  $J$  = 7.2 Hz, 1.01H), 7.18 (d,  $J$  = 8.9 Hz, 2.02H), 6.89 (d,  $J$  = 8.9 Hz, 2.02H), 5.93 (q,  $J$  = 7.0 Hz, 1H), 5.49 (q,  $J$  = 7.4 Hz, 0.01H), 1.85 (d,  $J$  = 7.5 Hz, 0.03H), 1.74 (d,  $J$  = 7.0 Hz, 3H).  $^{13}\text{C}$  NMR (126 MHz,  $\text{CDCl}_3$ )  $\delta$  155.9, 149.6, 135.1, 129.5, 128.5, 128.0, 126.3, 125.1, 116.7, 112.6, 11.3. IR (KBr): 3058, 3036, 2962, 2916, 2857, 1661, 1593, 1486, 1446, 1316, 1280, 1263, 1229, 1162, 1091, 1016, 969, 825, 753, 699  $\text{cm}^{-1}$ . HRMS-ESI ( $m/z$ ) calcd. for  $[\text{C}_{15}\text{H}_{14}\text{ClO}]^+$  ( $[\text{M} + \text{H}]^+$ ): 245.0728; found: 245.0723.

(*Z*)-1-Bromo-4-((1-phenylprop-1-en-1-yl)oxy)benzene (**5d**)



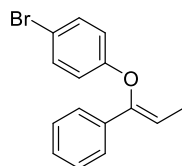

Colorless oil (22.8 mg, 79%, eluents: PE/EA = 40/1), *Z/E* = 50/1.  $^1\text{H NMR}$  (500 MHz,  $\text{CDCl}_3$ )  $\delta$  7.44 (d,  $J = 7.7$  Hz, 2.04H), 7.32 (d,  $J = 8.5$  Hz, 2.04H), 7.28 (t,  $J = 7.4$  Hz, 2.04H), 7.23 (t,  $J = 7.1$  Hz, 1.02H), 6.84 (d,  $J = 8.5$  Hz, 2.04H), 5.94 (q,  $J = 7.0$  Hz, 1H), 5.50 (q,  $J = 7.4$  Hz, 0.02H), 1.86 (d,  $J = 7.3$  Hz, 0.06H), 1.74 (d,  $J = 7.0$  Hz, 3H).  $^{13}\text{C NMR}$  (126 MHz,  $\text{CDCl}_3$ )  $\delta$  156.4, 149.5, 135.0, 132.4, 128.5, 128.0, 125.1, 117.2, 113.6, 112.7, 11.4. IR (KBr): 3059, 3035, 2919, 2855, 1662, 1588, 1483, 1446, 1316, 1263, 1228, 1164, 1099, 1070, 1015, 969, 824, 751, 695  $\text{cm}^{-1}$ . HRMS-ESI ( $m/z$ ) calcd. for  $[\text{C}_{15}\text{H}_{14}\text{BrO}]^+$  ( $[\text{M} + \text{H}]^+$ ): 289.0223; found: 289.0216.

(*Z*)-1-Iodo-4-((1-phenylprop-1-en-1-yl)oxy)benzene (**5e**)

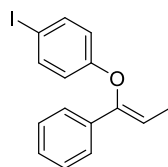

Colorless oil (55.8 mg, 83%, eluents: PE/EA = 40/1), *Z/E* = 25/1.  $^1\text{H NMR}$  (500 MHz,  $\text{CDCl}_3$ )  $\delta$  7.53 (d,  $J = 8.9$  Hz, 2.08H), 7.47 (d,  $J = 7.2$  Hz, 2.08H), 7.32-7.24 (m, 3.12H). 6.77 (d,  $J = 8.8$  Hz, 2.08H), 5.96 (q,  $J = 7.0$  Hz, 1H), 5.54 (q,  $J = 7.4$  Hz, 0.04H), 1.89 (d,  $J = 7.4$  Hz, 0.12H), 1.77 (d,  $J = 7.0$  Hz, 3H).  $^{13}\text{C NMR}$  (126 MHz,  $\text{CDCl}_3$ )  $\delta$  157.3, 149.5, 138.4, 138.3, 135.1, 128.5, 128.0, 125.1, 117.8, 112.7, 11.4. IR (KBr): 3056, 3035, 2961, 2913, 2857, 1661, 1582, 1508, 1479, 1446, 1398, 1315, 1264, 1227, 1167, 1111, 1057, 1015, 968, 913, 821, 785, 750, 694  $\text{cm}^{-1}$ . HRMS-ESI ( $m/z$ ) calcd. for  $[\text{C}_{15}\text{H}_{14}\text{IO}]^+$  ( $[\text{M} + \text{H}]^+$ ): 337.0084; found: 337.0075.

Methyl (*Z*)-4-((1-phenylprop-1-en-1-yl)oxy)benzoate (**5f**)

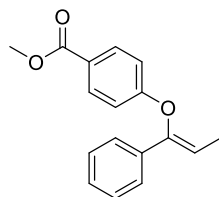

Yellow oil (11.5 mg, 43%, eluents: PE/EA = 40/1), *Z/E* = 33/1.  $^1\text{H NMR}$  (500 MHz,

CDCl<sub>3</sub>)  $\delta$  7.94 (d,  $J$  = 8.9 Hz, 2.06H), 7.45 (d,  $J$  = 7.5 Hz, 2.06H), 7.30-7.22 (m, 3.09H), 6.98 (d,  $J$  = 8.9 Hz, 2.06H), 5.98 (q,  $J$  = 7.0 Hz, 1H), 5.61 (q,  $J$  = 7.4 Hz, 0.03H), 3.86 (s, 3H), 3.85 (s, 0.09H), 1.90 (d,  $J$  = 7.4 Hz, 0.09H), 1.74 (d,  $J$  = 7.0 Hz, 3H). <sup>13</sup>C NMR (126 MHz, CDCl<sub>3</sub>)  $\delta$  166.7, 161.2, 149.4, 134.9, 131.7, 128.5, 128.1, 124.9, 123.5, 115.1, 112.7, 51.8, 11.4. IR (KBr): 3058, 3035, 2951, 2923, 2856, 1720, 1664, 1605, 1505, 1435, 1315, 1278, 1237, 1190, 1162, 1111, 1014, 969, 850, 804, 769, 749, 695 cm<sup>-1</sup>. HRMS-ESI (m/z) calcd. for [C<sub>17</sub>H<sub>17</sub>O<sub>3</sub>]<sup>+</sup> ([M + H]<sup>+</sup>): 269.1172; found: 269.1168.

(Z)-1-(4-((1-Phenylprop-1-en-1-yl)oxy)phenyl)ethan-1-one (**5g**)

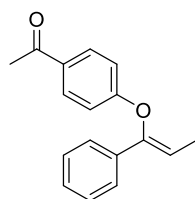

Yellow oil (20.9 mg, 83%, eluents: PE/EA = 40/1),  $Z/E$  = 25/1. <sup>1</sup>H NMR (500 MHz, CDCl<sub>3</sub>)  $\delta$  7.88 (d,  $J$  = 8.9 Hz, 2.08H), 7.45 (d,  $J$  = 7.3 Hz, 2.08H), 7.30-7.23 (m, 3.12H), 7.00 (d,  $J$  = 8.8 Hz, 2H), 5.99 (q,  $J$  = 7.0 Hz, 1H), 5.63 (q,  $J$  = 7.4 Hz, 0.04H), 2.52 (s, 3H), 2.50 (s, 0.12H), 1.91 (d,  $J$  = 7.4 Hz, 0.12H), 1.75 (d,  $J$  = 7.0 Hz, 3H). <sup>13</sup>C NMR (126 MHz, CDCl<sub>3</sub>)  $\delta$  196.6, 161.3, 149.3, 134.8, 131.1, 130.7, 128.6, 128.1, 124.9, 115.2, 112.8, 26.3, 11.4. IR (KBr): 3060, 3007, 2920, 2855, 1674, 1597, 1580, 1500, 1447, 1416, 1355, 1318, 1269, 1225, 1165, 1108, 1008, 954, 843, 788, 759, 710 cm<sup>-1</sup>. HRMS-ESI (m/z) calcd. for [C<sub>17</sub>H<sub>17</sub>O<sub>2</sub>]<sup>+</sup> ([M + H]<sup>+</sup>): 253.1223; found: 253.1218.

(Z)-1-Phenoxy-4-((1-phenylprop-1-en-1-yl)oxy)benzene (**5h**)

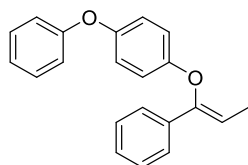

Colorless oil (33.3 mg, 55%, PE/EA = 40/1),  $Z/E$  = 25/1. <sup>1</sup>H NMR (500 MHz, CDCl<sub>3</sub>)  $\delta$  7.49 (d,  $J$  = 7.4 Hz, 2.08H), 7.31-7.27 (m, 4.16H), 7.24 (t,  $J$  = 7.3 Hz, 1.04H), 7.04 (t,  $J$  = 7.4 Hz, 1.04H), 6.95-6.89 (m, 6.24H), 5.92 (q,  $J$  = 7.0 Hz, 1H), 5.43 (q,  $J$  = 7.3 Hz, 0.04H), 1.85 (d,  $J$  = 7.4 Hz, 0.12H), 1.79 (d,  $J$  = 7.0 Hz, 3H). <sup>13</sup>C NMR (126 MHz, CDCl<sub>3</sub>)  $\delta$  158.2, 153.4, 150.9, 150.0, 135.5, 129.6, 128.4, 127.8, 125.2, 122.6, 120.5, 117.9, 116.3, 112.4, 11.4. IR (KBr): 3058, 2925, 2855, 1662, 1589, 1488, 1446, 1316,

1246, 1211, 1194, 1098, 1084, 1017, 847, 834, 754, 692  $\text{cm}^{-1}$ . HRMS-ESI ( $m/z$ ) calcd. for  $[\text{C}_{21}\text{H}_{19}\text{O}_2]^+$  ( $[\text{M} + \text{H}]^+$ ): 303.1380; found: 303.1374.

(*Z*)-*N,N*-Diphenyl-4-((1-phenylprop-1-en-1-yl)oxy)aniline (**5i**)

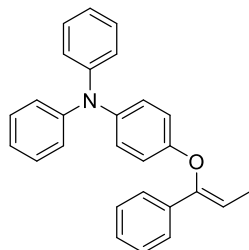

Colorless oil (34.7 mg, 46%, eluents: PE/EA = 10/1), *Z/E* = 33/1.  $^1\text{H}$  NMR (500 MHz,  $\text{CDCl}_3$ )  $\delta$  7.50 (d,  $J = 7.6$  Hz, 2.06H), 7.31 (t,  $J = 7.4$  Hz, 2.06H), 7.26 (m, 1.03H), 7.20 (t,  $J = 7.8$  Hz, 4.12H), 7.02 (d,  $J = 7.9$  Hz, 4.12H), 6.99 (d,  $J = 8.9$  Hz, 2.06H), 6.94 (t,  $J = 7.3$  Hz, 2.06H), 6.87 (d,  $J = 8.8$  Hz, 2.06H), 5.92 (q,  $J = 6.9$  Hz, 1H), 5.45 (q,  $J = 7.4$  Hz, 0.03H), 1.85 (d,  $J = 7.4$  Hz, 0.09H), 1.79 (d,  $J = 7.0$  Hz, 3H).  $^{13}\text{C}$  NMR (126 MHz,  $\text{CDCl}_3$ )  $\delta$  153.6, 149.9, 148.1, 141.4, 135.7, 129.1, 128.4, 127.8, 126.8, 125.2, 123.2, 122.0, 116.2, 112.4, 11.5. IR (KBr): 3058, 3036, 2917, 2855, 1660, 1588, 1500, 1446, 1314, 1276, 1217, 1161, 1104, 1075, 1016, 967, 914, 830, 751, 695  $\text{cm}^{-1}$ . HRMS-ESI ( $m/z$ ) calcd. for  $[\text{C}_{27}\text{H}_{23}\text{NNaO}]^+$  ( $[\text{M} + \text{Na}]^+$ ): 400.1672; found: 400.1679.

(*Z*)-2-((4-Methoxyphenyl)thio)-*N*-methyl-*N*-(2-((1-phenylprop-1-en-1-yl)oxy)phenyl)aniline (**4g**)

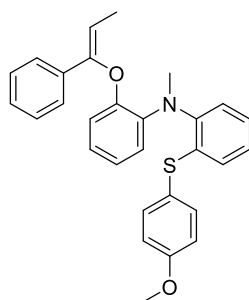

White solid (42.6 mg, 47%, eluents: PE/EA = 40/1), *Z/E* = 33/1. M.p.: 73-75  $^\circ\text{C}$ .  $^1\text{H}$  NMR (500 MHz,  $\text{CDCl}_3$ )  $\delta$  7.43 (m, 2.06H), 7.38 (d,  $J = 8.6$  Hz, 2.06H), 7.20-7.16 (m, 3.09H), 7.12-7.07 (m, 2.06H), 6.99 (dd,  $J = 7.8$  Hz, 1.2 Hz, 1.03H), 6.92 (t,  $J = 7.4$  Hz, 1.03H), 6.89-6.85 (m, 3.09H), 6.81-6.77 (m, 2.06H), 6.68 (dd,  $J = 8.0$  Hz, 1.1 Hz, 1.03H), 5.83 (q,  $J = 7.0$  Hz, 1H), 5.21 (q,  $J = 7.4$  Hz, 0.03H), 3.81 (s, 3H), 3.79 (s, 0.09H), 3.38 (s, 3H), 3.30 (s, 0.09H), 1.75 (d,  $J = 7.4$  Hz, 0.09H), 1.57 (d,  $J = 7.1$  Hz, 3H).  $^{13}\text{C}$  NMR (126 MHz,  $\text{CDCl}_3$ )  $\delta$  159.9, 149.6, 149.6, 148.2, 139.3, 136.5, 136.5,

135.6, 128.2, 128.1, 127.6, 125.6, 125.3, 124.5, 124.5, 123.5, 122.6, 121.2, 120.7, 114.9, 113.9, 112.2, 55.3, 41.0, 11.2. IR (KBr): 3059, 2938, 2908, 2837, 2805, 1687, 1593, 1494, 1470, 1446, 1350, 1287, 1248, 1220, 1174, 1103, 1030, 952, 873, 830, 747, 691  $\text{cm}^{-1}$ . HRMS-ESI (m/z) calcd. for  $[\text{C}_{29}\text{H}_{28}\text{NO}_2\text{S}]^+$  ( $[\text{M} + \text{H}]^+$ ): 454.1835; found: 454.1828.

(Z)-1-Methyl-3-((1-phenylprop-1-en-1-yl)oxy)benzene (**5k**)

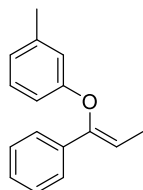

Colorless oil (30.1 mg, 67%, eluents: PE/EA = 40/1),  $Z/E = 50/1$ .  $^1\text{H}$  NMR (500 MHz,  $\text{CDCl}_3$ )  $\delta$  7.50 (d,  $J = 7.4$  Hz, 2.04H), 7.29 (t,  $J = 7.4$  Hz, 2.04H), 7.24 (t,  $J = 7.3$  Hz, 1.02H), 7.12 (t,  $J = 7.8$  Hz, 1.02H), 6.83 (s, 1.02H), 6.77 (d,  $J = 7.8$  Hz, 2.04H), 5.95 (q,  $J = 7.0$  Hz, 1H), 5.47 (q,  $J = 7.3$  Hz, 0.02H), 2.43 (s, 0.06H), 2.31 (s, 3H), 1.87 (d,  $J = 7.4$  Hz, 0.06H), 1.78 (d,  $J = 7.0$  Hz, 3H).  $^{13}\text{C}$  NMR (126 MHz,  $\text{CDCl}_3$ )  $\delta$  157.3, 149.7, 139.6, 135.7, 129.2, 128.4, 127.7, 125.1, 122.2, 116.1, 112.3, 21.5, 11.4. IR (KBr): 3055, 3034, 2917, 2858, 1661, 1610, 1588, 1488, 1445, 1317, 1253, 1150, 1025, 968, 916, 856, 817, 772, 735, 690  $\text{cm}^{-1}$ . HRMS-ESI (m/z) calcd. for  $[\text{C}_{16}\text{H}_{17}\text{O}]^+$  ( $[\text{M} + \text{H}]^+$ ): 225.1274; found: 225.1272.

(Z)-1-Methyl-2-((1-phenylprop-1-en-1-yl)oxy)benzene (**5l**)

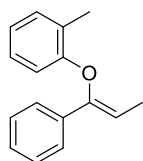

Colorless oil (21.0 mg, 47%, eluents: PE/EA = 40/1),  $Z/E = 50/1$ .  $^1\text{H}$  NMR (500 MHz,  $\text{CDCl}_3$ )  $\delta$  7.47 (d,  $J = 7.3$  Hz, 2.04H), 7.29 (t,  $J = 7.4$  Hz, 2.04H), 7.25-7.19 (m, 2.04H), 6.99 (t,  $J = 7.7$  Hz, 1.02H), 6.89 (t,  $J = 7.3$  Hz, 1.02H), 6.70 (d,  $J = 8.1$  Hz, 1.02H), 5.95 (q,  $J = 6.9$  Hz, 1H), 5.18 (q,  $J = 7.3$  Hz, 0.02H), 2.46 (s, 3H), 2.34 (s, 0.06H), 1.82 (d,  $J = 7.3$  Hz, 0.06H), 1.75 (d,  $J = 6.9$  Hz, 3H).  $^{13}\text{C}$  NMR (126 MHz,  $\text{CDCl}_3$ )  $\delta$  155.3, 150.0, 135.7, 130.9, 128.4, 127.8, 126.7, 126.1, 125.0, 121.1, 112.9, 112.1, 16.3, 11.3. IR (KBr): 3057, 3029, 2921, 2856, 1660, 1589, 1490, 1445, 1317, 1262, 1229, 1186, 1151, 1118, 1018, 968, 876, 815, 745, 693  $\text{cm}^{-1}$ . HRMS-ESI (m/z)

calcd. for  $[C_{16}H_{17}O]^+$  ( $[M + H]^+$ ): 225.1274; found: 225.1272.

(Z)-1,3-Dimethyl-5-((1-phenylprop-1-en-1-yl)oxy)benzene (**5m**)

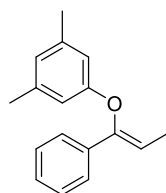

Colorless oil (37.2 mg, 78%, eluents: PE/EA = 40/1),  $Z/E = 50/1$ .  $^1H$  NMR (500 MHz,  $CDCl_3$ )  $\delta$  7.50 (d,  $J = 7.4$  Hz, 2.04H), 7.29 (t,  $J = 7.5$  Hz, 2.04H), 7.23 (t,  $J = 7.3$  Hz, 1.02H), 6.60 (m, 3.06H), 5.94 (q,  $J = 6.9$  Hz, 1H), 5.44 (q,  $J = 7.3$  Hz, 0.02H), 2.38 (s, 0.12H), 2.25 (s, 6H), 1.87 (d,  $J = 7.4$  Hz, 0.06H), 1.75 (d,  $J = 7.0$  Hz, 3H).  $^{13}C$  NMR (126 MHz,  $CDCl_3$ )  $\delta$  157.3, 149.6, 139.3, 135.8, 128.4, 127.7, 125.1, 123.2, 113.0, 112.2, 21.4, 11.5. IR (KBr): 3055, 3035, 2917, 2857, 1660, 1614, 1593, 1492, 1470, 1446, 1377, 1313, 1292, 1263, 1144, 1054, 1032, 995, 969, 835, 762, 702  $cm^{-1}$ . HRMS-ESI (m/z) calcd. for  $[C_{17}H_{19}O]^+$  ( $[M + H]^+$ ): 239.1430; found: 239.1426.

(Z)-2-((3,5-Dimethylphenylthio)-N-methyl-N-(2-((1-phenylprop-1-en-1-yl)oxy)phenyl)aniline (**4j**)

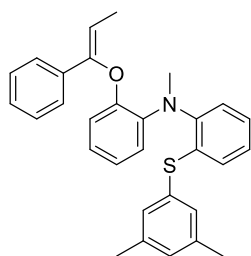

Colorless oil (5.4 mg, 6%, eluents: PE/EA = 40/1),  $Z/E = 11/1$ .  $^1H$  NMR (500 MHz,  $CDCl_3$ )  $\delta$  7.40-7.38 (m, 2.18H), 7.18-7.12 (m, 5.45H), 7.02 (s, 2.18H), 6.99-6.94 (m, 3.27H), 6.87-6.84 (m, 2.18H), 6.78 (t,  $J = 7.9$  Hz, 1.09H), 6.66 (dd,  $J = 8.0$  Hz, 1.1 Hz, 1.09H), 5.82 (q,  $J = 6.9$  Hz, 1H), 5.20 (q,  $J = 7.4$  Hz, 0.09H), 3.37 (s, 3H), 3.29 (s, 0.27H), 2.24 (s, 0.54H), 2.22 (s, 6H), 1.75 (d,  $J = 7.4$  Hz, 0.27H), 1.55 (d,  $J = 6.9$  Hz, 3H).  $^{13}C$  NMR (126 MHz,  $CDCl_3$ )  $\delta$  149.6, 149.6, 149.3, 139.3, 138.7, 135.6, 134.8, 134.4, 131.0, 130.2, 129.3, 128.2, 127.5, 126.3, 125.2, 124.4, 123.6, 122.6, 121.2, 120.8, 113.9, 112.2, 41.2, 21.0, 11.2. IR (KBr): 3057, 3032, 2917, 2855, 2802, 1660, 1598, 1579, 1495, 1471, 1445, 1317, 1261, 1215, 1123, 1104, 1051, 1016, 968, 874, 811, 747, 692  $cm^{-1}$ . HRMS-ESI (m/z) calcd. for  $[C_{30}H_{30}NOS]^+$  ( $[M + H]^+$ ): 452.2043; found: 452.2046.

((*E*)-2-(((*Z*)-1-Phenylprop-1-en-1-yl)oxy)vinyl)benzene (**5n**)

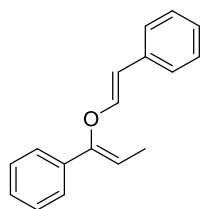

Colorless oil (11.3 mg, 24%, eluents: PE). <sup>1</sup>H NMR (500 MHz, CDCl<sub>3</sub>) δ 7.49 (d, *J* = 7.4 Hz, 2H), 7.33 (t, *J* = 7.5 Hz, 2H), 7.27 (t, *J* = 7.4 Hz, 1H), 7.23 (t, *J* = 7.3 Hz, 2H), 7.18 (d, *J* = 7.2 Hz, 2H), 7.12 (t, *J* = 7.1 Hz, 1H), 6.99 (d, *J* = 12.7 Hz, 1H), 6.06 (d, *J* = 12.7 Hz, 1H), 5.76 (q, *J* = 6.9 Hz, 1H), 1.83 (d, *J* = 7.0 Hz, 3H). <sup>13</sup>C NMR (126 MHz, CDCl<sub>3</sub>) δ 151.4, 146.1, 135.8, 135.4, 128.5, 128.4, 127.9, 125.9, 125.3, 125.2, 110.9, 109.0, 11.3. IR (KBr): 3061, 3034, 2927, 2855, 1728, 1698, 1648, 1599, 1494, 1449, 1316, 1265, 1212, 1132, 1072, 1028, 971, 927, 752, 698 cm<sup>-1</sup>. HRMS-ESI (*m/z*) calcd. for [C<sub>17</sub>H<sub>17</sub>O]<sup>+</sup> ([*M* + *H*]<sup>+</sup>): 237.1274; found: 237.1269.

## 5. The control experiments for mechanistic insights.

### 5.1. Reaction of **1a** with **2a** and NaOH under the standard conditions in the presence of different radical traps.

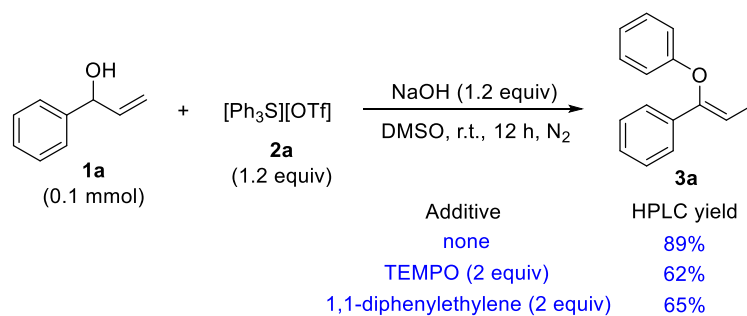

In a nitrogen-filled glovebox, a sealed tube was charge with **1a** (13.4 mg, 0.1 mmol), **2a** (49.5 mg, 0.12 mmol), NaOH (4.8 mg, 0.12 mmol), DMSO (1 mL), and a radical trap (0.2 mmol) with vigorous stirring. The mixture was reacted at room temperature for 12 h. The yields of **3a** were determined by HPLC using pure **3a** as an external standard (*t<sub>R</sub>* = 10.5 min, λ<sub>max</sub> = 252 nm, water / methanol = 20 / 80 (v / v)).

### 5.2. The standard reaction of **1a**, **2a** and NaOH in the darkness.

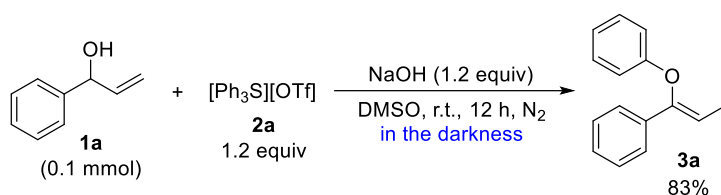

In a nitrogen-filled glovebox, a sealed tube was charge with **1a** (13.4 mg, 0.1 mmol), **2a** (49.5 mg, 0.12 mmol), NaOH (4.8 mg, 0.12 mmol), and DMSO (1 mL) with vigorous stirring. The sealed tube was fully wrapped with tin foil. The mixture was reacted at room temperature for 12 h. The yields of **3a** were determined by HPLC using pure **3a** as an external standard ( $t_{\text{R}} = 10.5$  min,  $\lambda_{\text{max}} = 252$  nm, water / methanol = 20 / 80 (v / v)).

### 5.3. Reaction of **1b** with NaOH in DMSO without using arylsulfonium salt under the standard conditions.

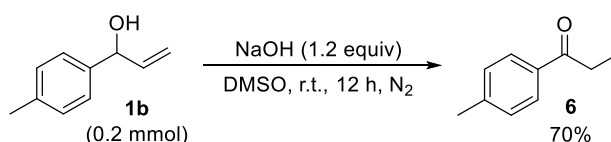

In a nitrogen-filled glovebox, a sealed tube was charge with **1b** (29.6 mg, 0.2 mmol), NaOH (9.6 mg, 0.24 mmol), and DMSO (2 mL) with vigorous stirring. The mixture was reacted at room temperature for 12 h, diluted with water (30 mL), and extracted with ethyl acetate ( $3 \times 20$  mL). The combined organic layers were dried over anhydrous  $\text{Na}_2\text{SO}_4$  and concentrated to dryness under reduced pressure. The residue was purified by flash column chromatography on silica gel using a mixture of petroleum ether and ethyl acetate (40/1, v/v) as eluents to give 1-(*p*-tolyl)propan-1-one (**6**)<sup>13</sup> as a yellow oil (20.7 mg, 50%).  $^1\text{H}$  NMR (500 MHz,  $\text{CDCl}_3$ )  $\delta$  7.87 (d,  $J = 8.0$  Hz, 2H), 7.25 (d,  $J = 8.4$  Hz, 2H), 2.97 (q,  $J = 7.3$  Hz, 2H), 2.41 (s, 3H), 1.22 (t,  $J = 7.3$  Hz, 3H).  $^{13}\text{C}$  NMR (126 MHz,  $\text{CDCl}_3$ )  $\delta$  200.5, 143.5, 134.6, 129.2, 128.1, 31.6, 21.6, 8.3.

### 5.4. Reaction of **6** with **2a** and NaOH in DMSO under the standard conditions.

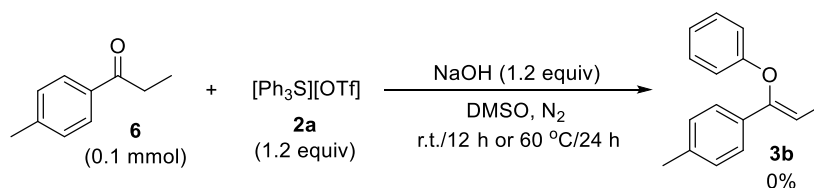

In a nitrogen-filled glovebox, a sealed tube was charge with **6** (14.8 mg, 0.1 mmol),

**2a** (49.5 mg, 0.12 mmol), NaOH (4.8 mg, 0.12 mmol), and DMSO (1 mL) with vigorous stirring. The mixture was reacted at room temperature for 12 h or at 60 °C for 24 h. Finally, no desired product (**3b**) was detected.

### 5.5. The standard reaction of **1a**, **2a** and NaOH in DMSO-*d*<sub>6</sub>.

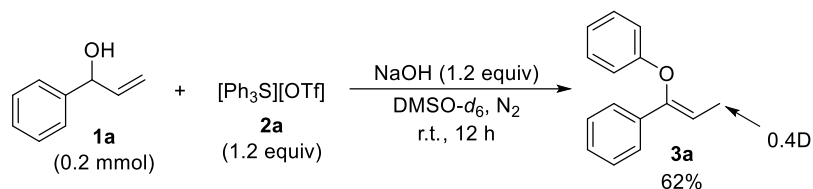

In a nitrogen-filled glovebox, a sealed tube was charge with **1a** (26.8 mg, 0.2 mmol), **2a** (99 mg, 0.24 mmol), NaOH (9.6 mg, 0.24 mmol), and DMSO-*d*<sub>6</sub> (2 mL) with vigorous stirring. The mixture was reacted at room temperature for 12 h, diluted with water (30 mL), and extracted with ethyl acetate (3 × 20 mL). The combined organic layers were dried over anhydrous Na<sub>2</sub>SO<sub>4</sub> and concentrated to dryness under reduced pressure. The residue was purified by flash column chromatography on silica gel using petroleum ether as eluents to give the partially deuterated **3a** (26.1 mg, 62%) as a white solid. <sup>1</sup>H NMR (500 MHz, CDCl<sub>3</sub>) δ 7.49 (d, *J* = 7.5 Hz, 2H), 7.28 (t, *J* = 7.4 Hz, 2H), 7.25-7.21 (m, 3H), 6.97 (d, *J* = 8.0 Hz, 2H), 6.94 (t, *J* = 7.4 Hz, 1H), 5.94 (q, *J* = 6.9 Hz, 1H), 1.77-1.74 (m, 2.6H).

### 5.6. The standard reaction of **1a**, **2a** and NaOH in DMSO/D<sub>2</sub>O (1/1, v/v).

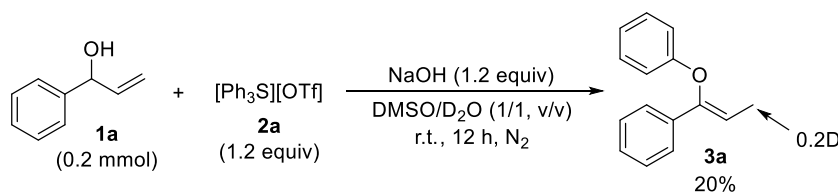

In a nitrogen-filled glovebox, a sealed tube was charge with **1a** (26.8 mg, 0.2 mmol), **2a** (99 mg, 0.24 mmol), NaOH (9.6 mg, 0.24 mmol), DMSO (1 mL), and D<sub>2</sub>O (1 mL) with vigorous stirring. The mixture was reacted at room temperature for 12 h, diluted with water (30 mL), and extracted with ethyl acetate (3 × 20 mL). The combined organic layers were dried over anhydrous Na<sub>2</sub>SO<sub>4</sub> and concentrated to dryness under reduced pressure. The residue was purified by flash column chromatography on silica gel using petroleum ether as an eluent to give the partially deuterated **3a** (8.4 mg, 20%) as a white solid. <sup>1</sup>H NMR (500 MHz, CDCl<sub>3</sub>) δ 7.48 (d, *J* = 7.3 Hz, 2H), 7.27 (t, *J* = 7.0 Hz, 2H), 7.24-7.21 (m, 3H), 6.96 (d, *J* = 8.0 Hz, 2H), 6.92 (t, *J* = 7.4 Hz, 1H),



5.93 (q,  $J = 7.0$  Hz, 1H), 1.76 (d,  $J = 7.0$  Hz, 2.8H).

## References

1. P. Xu, D. Zhao, F. Berger, A. Hamad, J. Rickmeier, R. Petzold, M. Kondratiuk, K. Bohdan and T. Ritter, *Angew. Chem. Int. Ed.* 2020, **59**, 1956-1960.
2. F. Berger, M. B. Plutschack, J. Riegger, W. Yu, S. Speicher, M. Ho, N. Frank and T. Ritter, *Nature* 2019, **567**, 223-228.
3. J. Wu, Z. Wang, X.-Y. Chen, Y. Wu, D. Wang, Q. Peng and P. Wang, *Sci. China Chem.* 2020, **63**, 336-340.
4. T. Yoshida, Y. Honda, T. Morofuji and N. Kano, *J. Org. Chem.* 2022, **87**, 7565-7573.
5. Z.-Y. Tian and C.-P. Zhang, *Chem. Commun.* 2019, **55**, 11936-11939.
6. Z.-Y. Tian, S.-M. Wang, S.-J. Jia, H.-X. Song and C.-P. Zhang, *Org. Lett.* 2017, **19**, 5454-5457.
7. S. Jautze and R. Peter, *Angew. Chem. Int. Ed.* 2008, **47**, 9284-9288.
8. F. Lazreg, S. Guidone, A. Herrera, F. Nahra and C. Cazin, *Dalton. Trans.* 2017, **46**, 2439-2444.
9. L. M. Stanley, B. Chen, M. Ueda and J. F. Hartwig, *J. Am. Chem. Soc.* 2010, **132**, 8918-8920.
10. C. Fischer, C. Defieber, T. Suzuki and E. M. Carreira, *J. Am. Chem. Soc.* 2004, **126**, 1628-1629.
11. S. Yasar, I. Ozdemir, B. Cetinkaya, J. Renaud and C. Bruneau, *Eur. J. Org. Chem.* 2008, **2008**, 2142-2149.
12. Z.-Y. Tian, Z.-H. Lin and C.-P. Zhang, *Org. Lett.* 2021, **23**, 4400-4405.
13. L.-Y. Wang, S.-S. Shang, G.-S. Li, L.-H. Ren, Y. Lv and S. Gao, *J. Org. Chem.* 2016, **81**, 2189-2193.

## 6. NMR spectra of the products

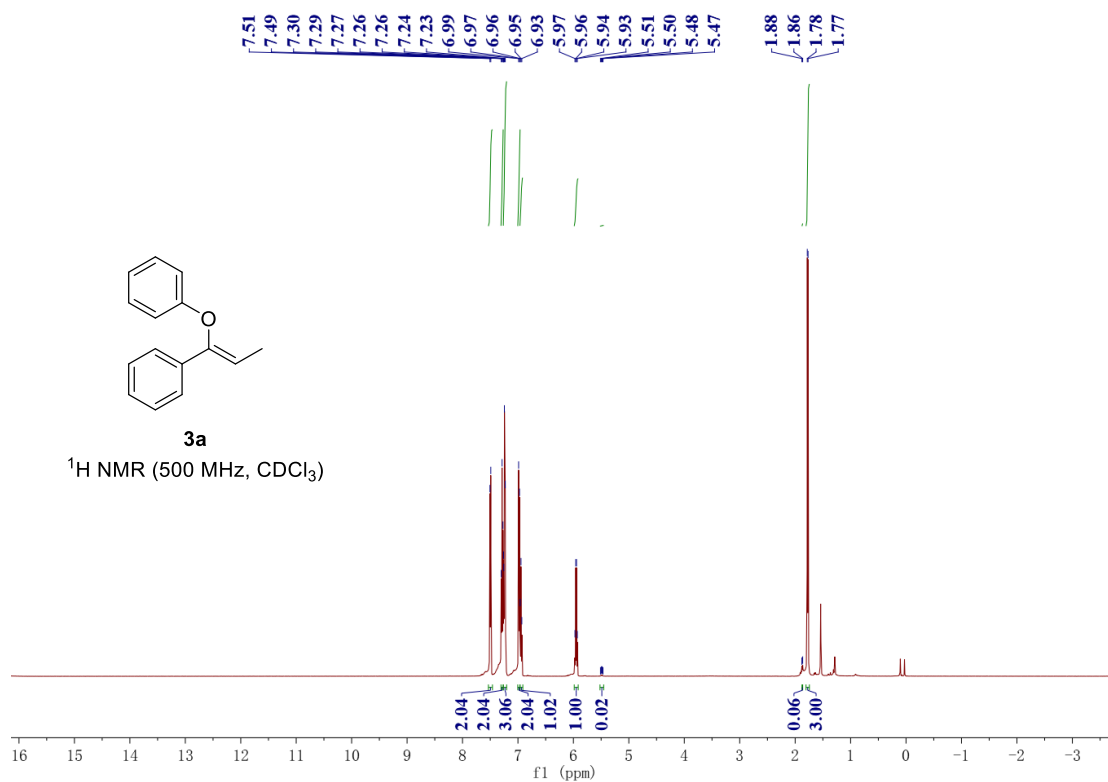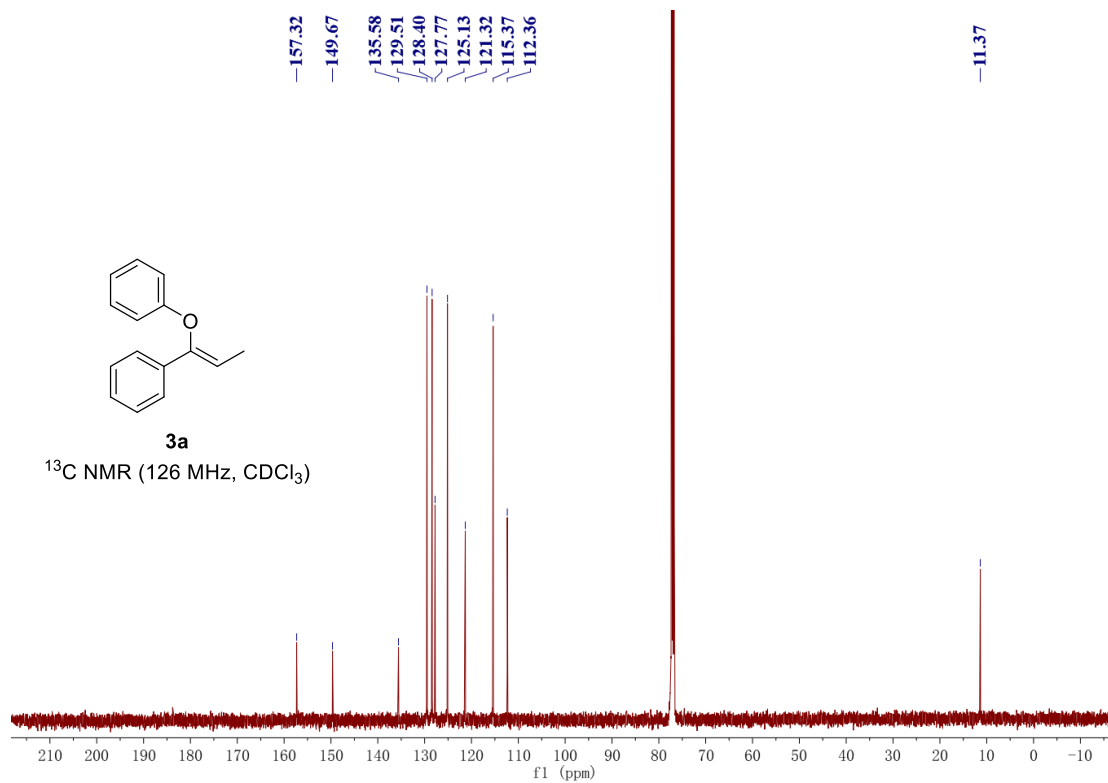

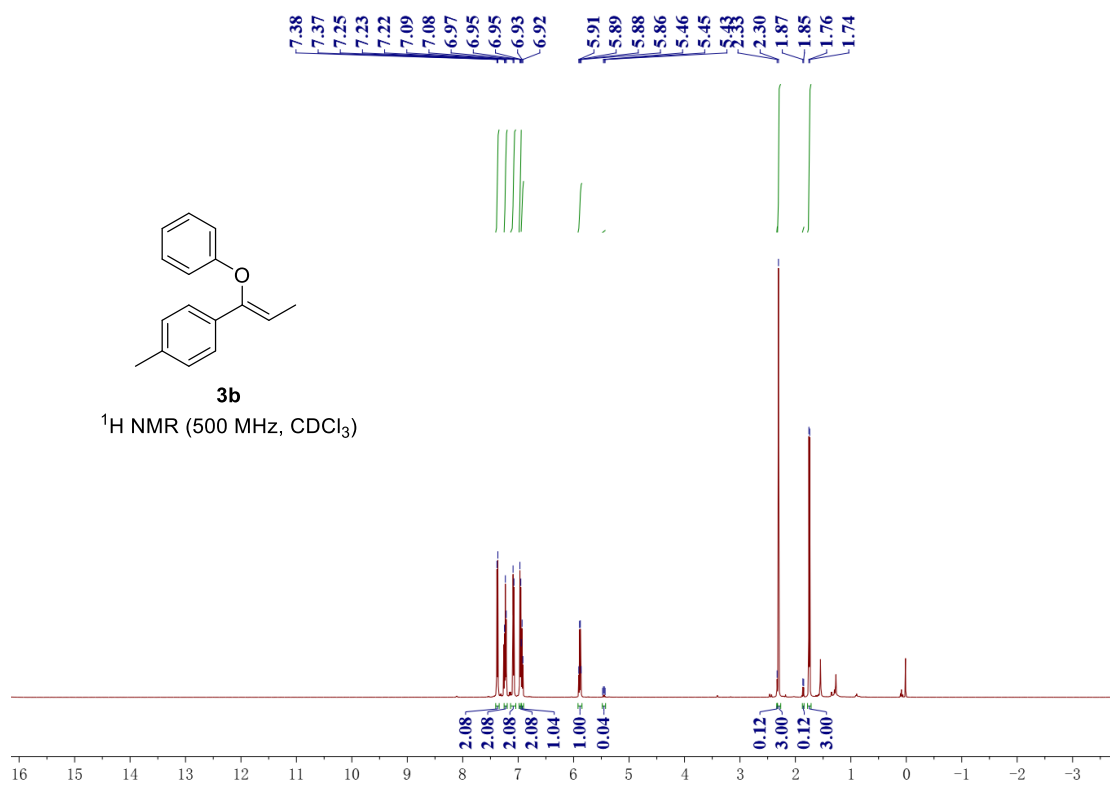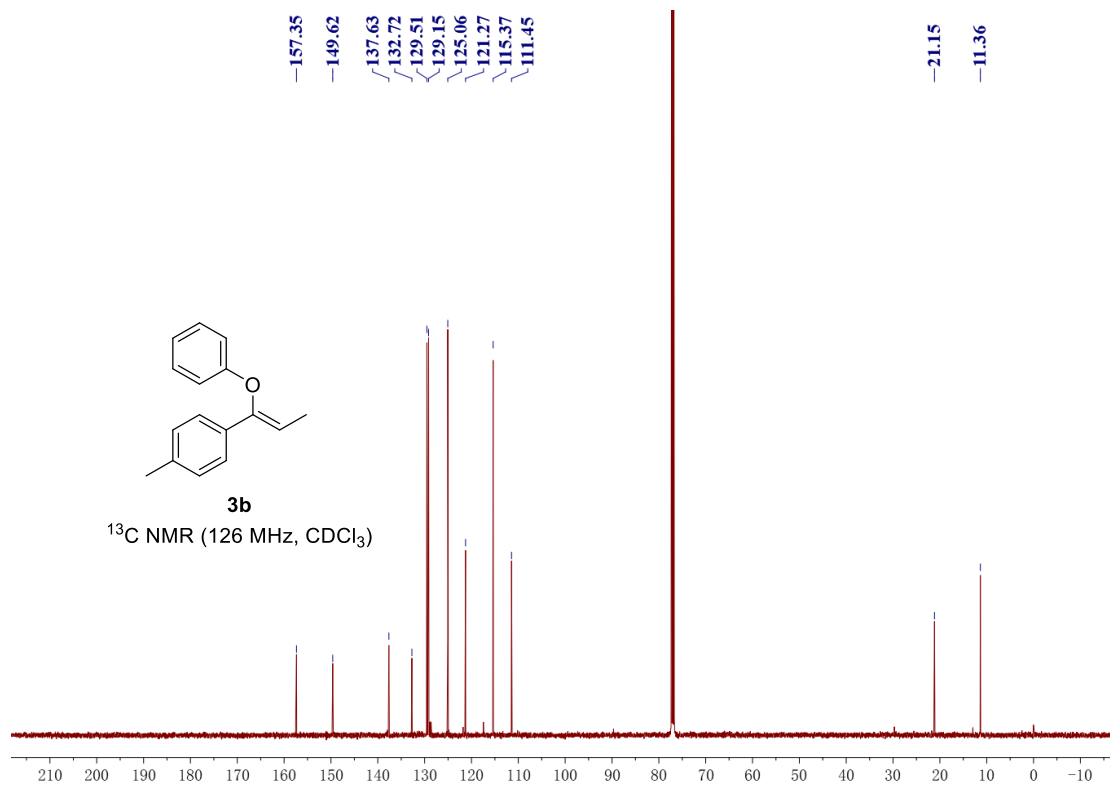

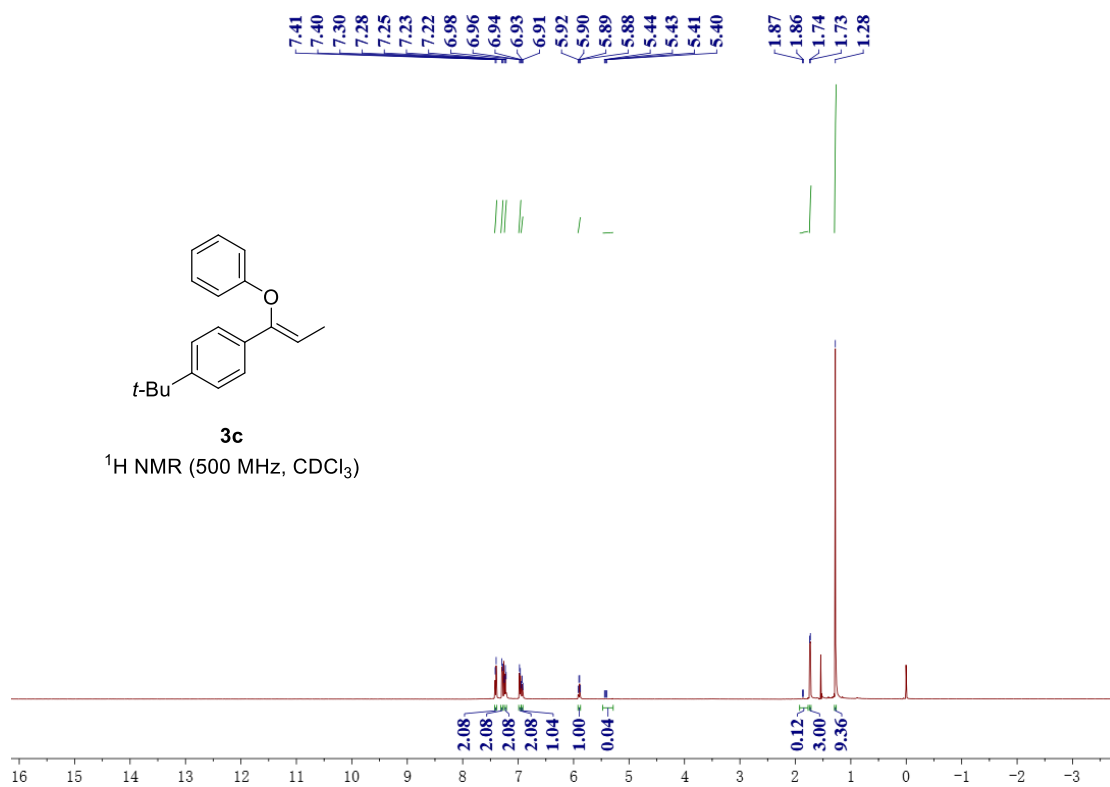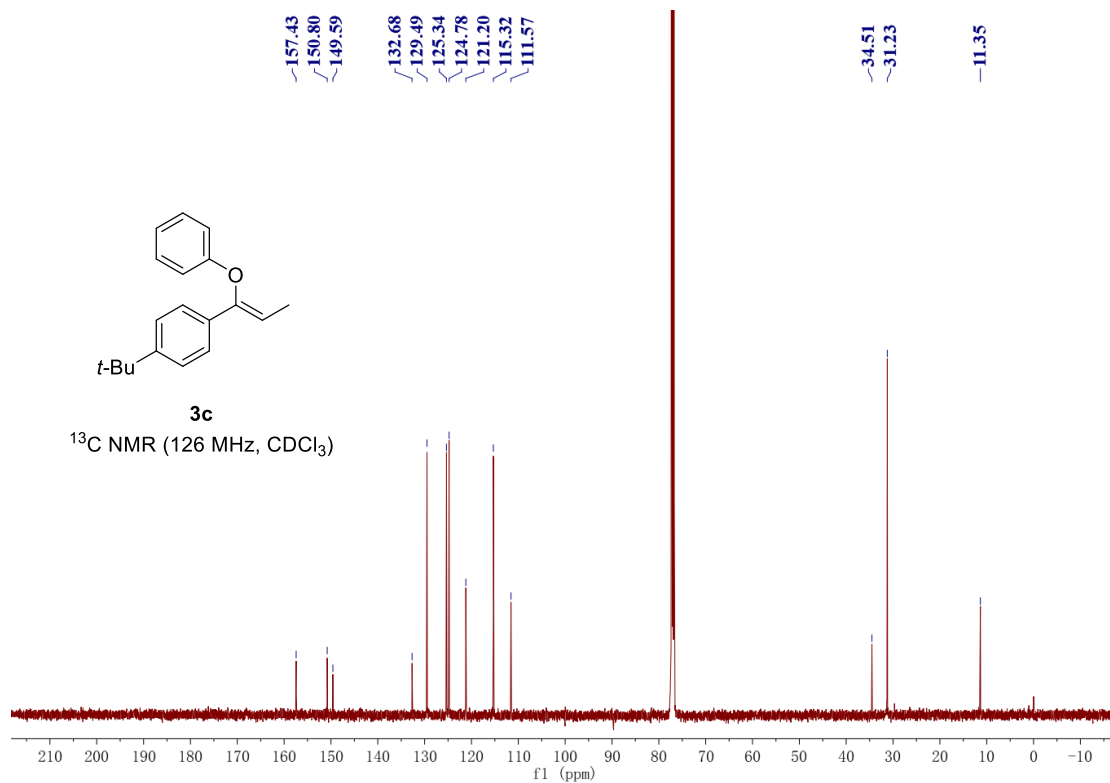

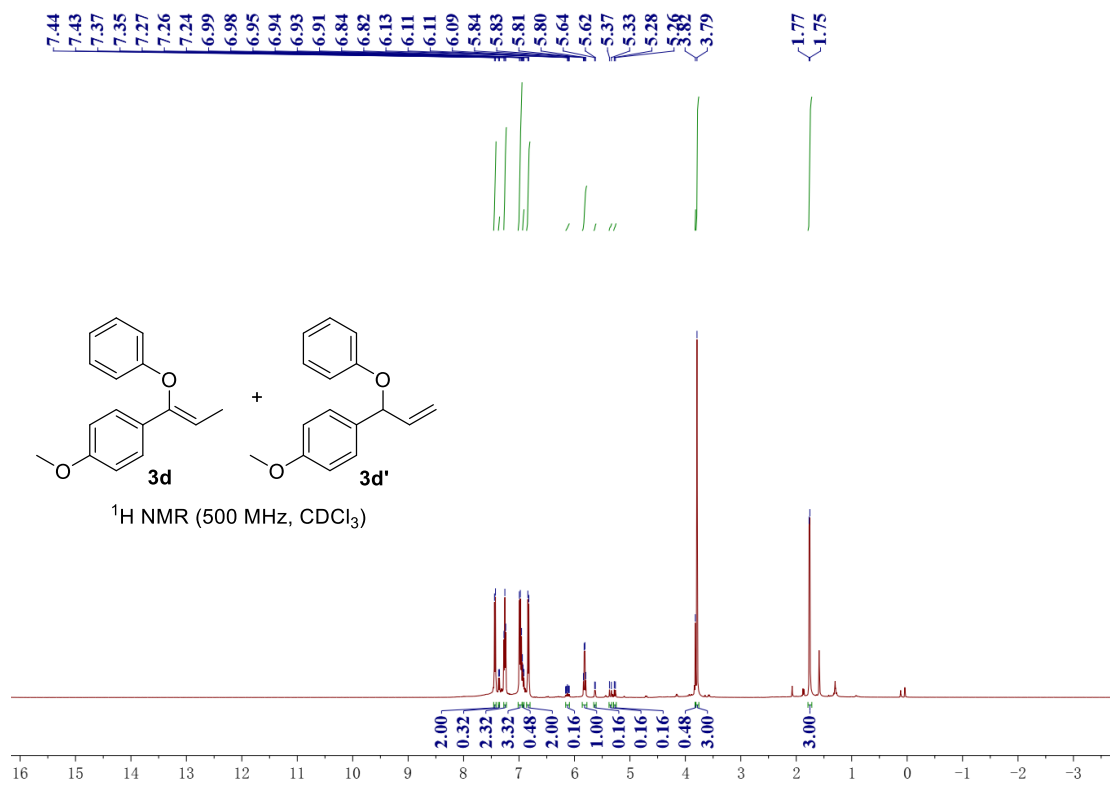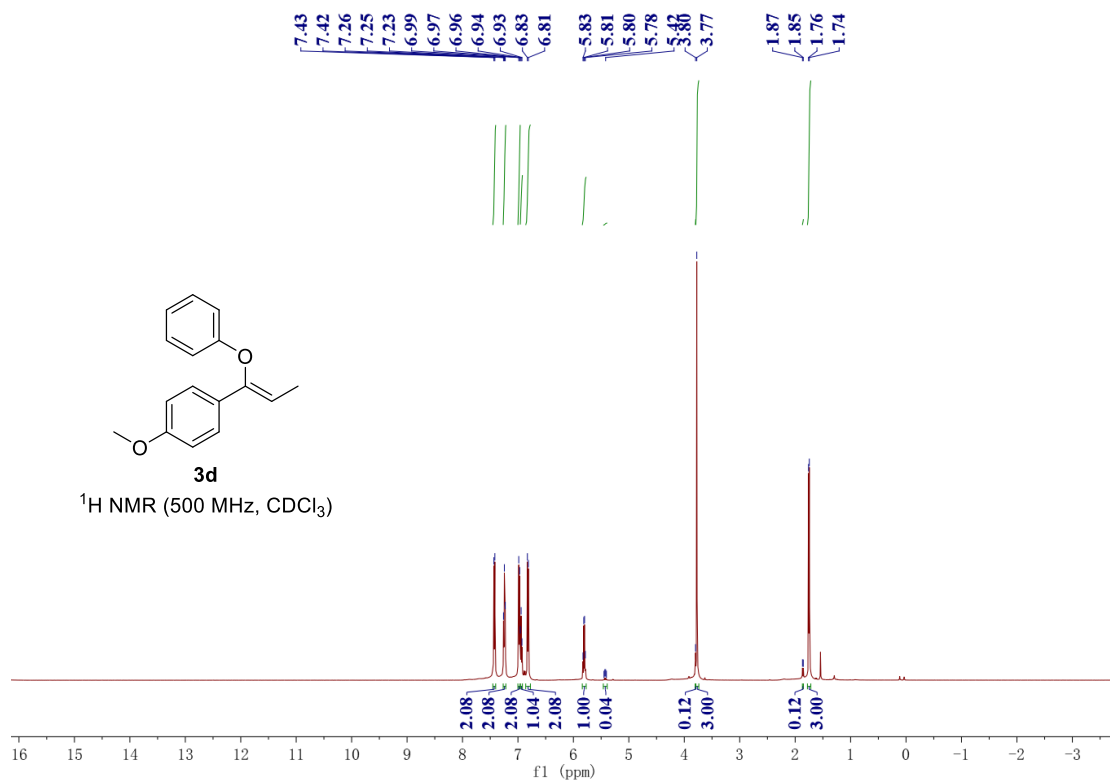

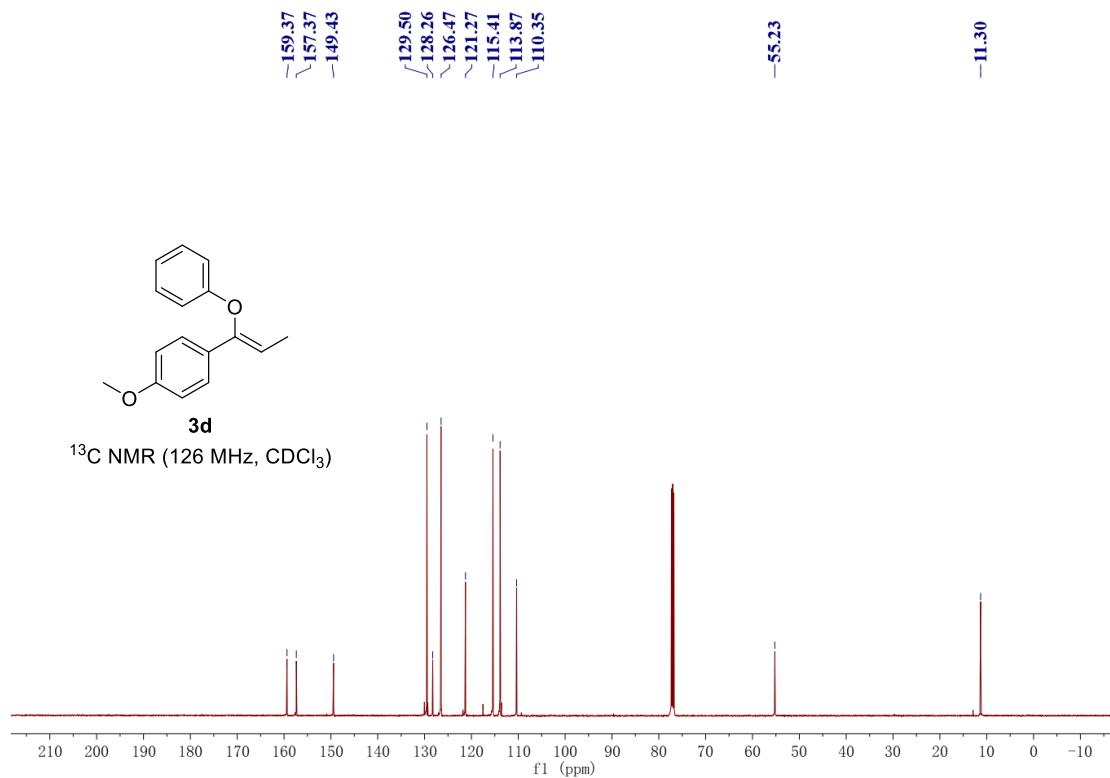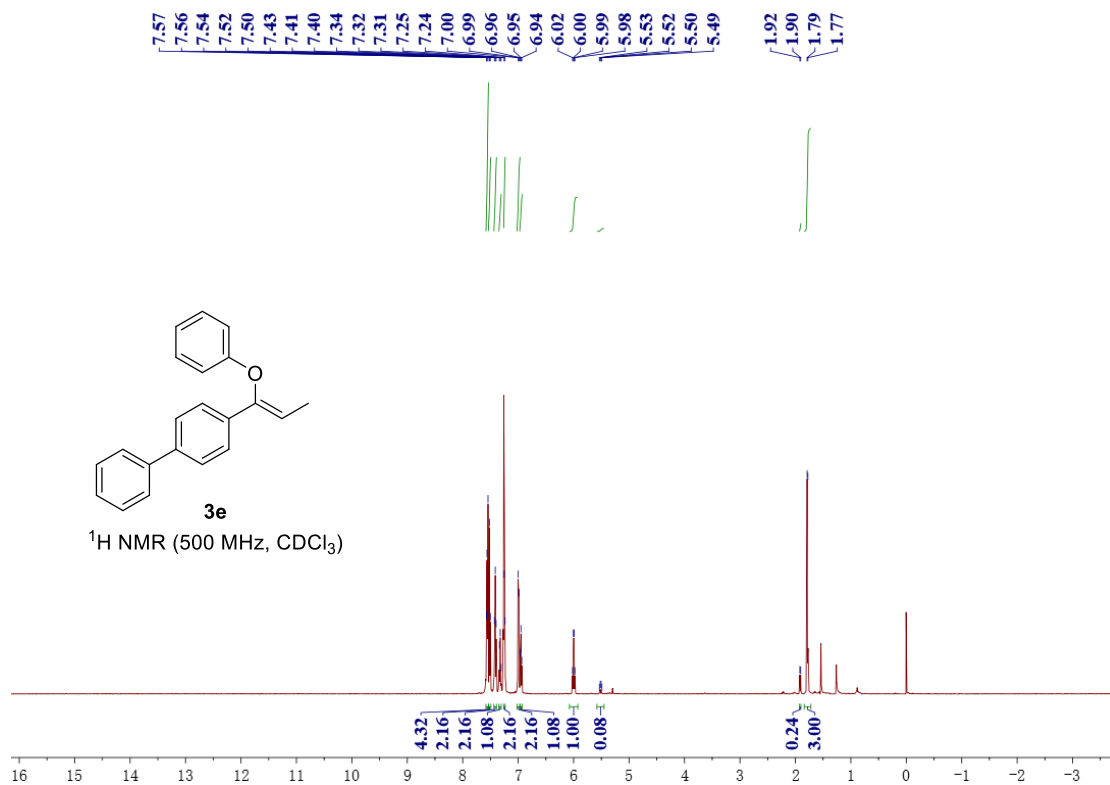

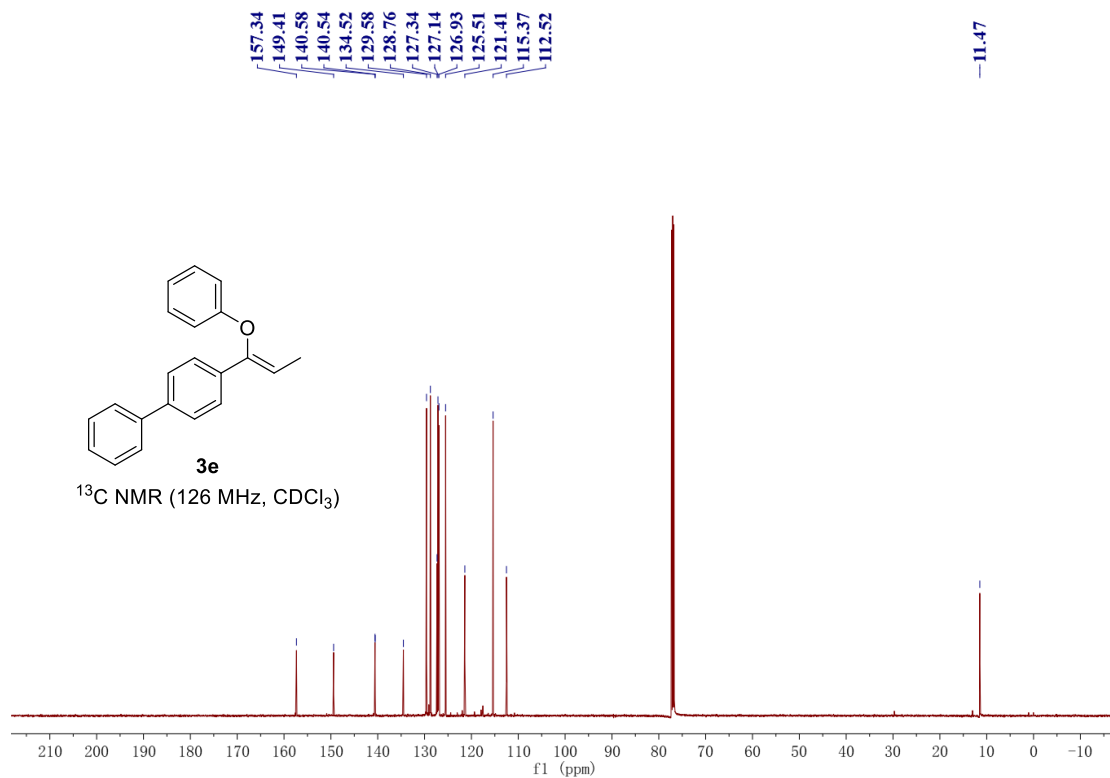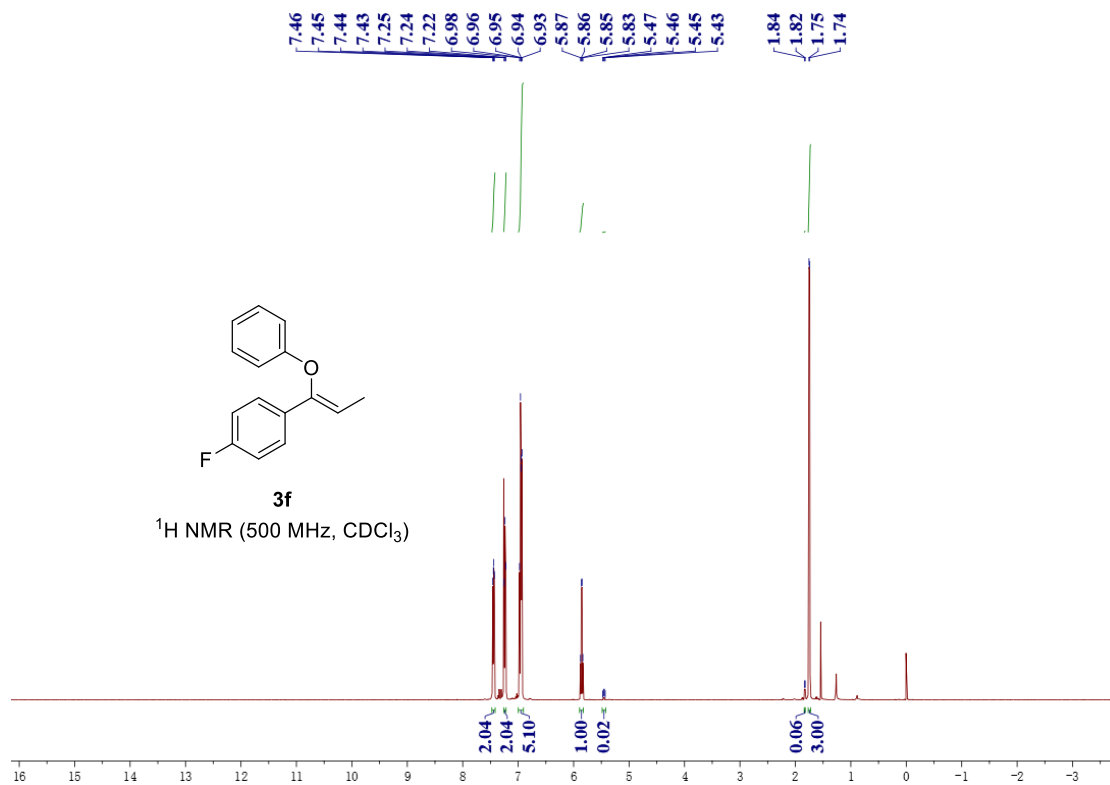

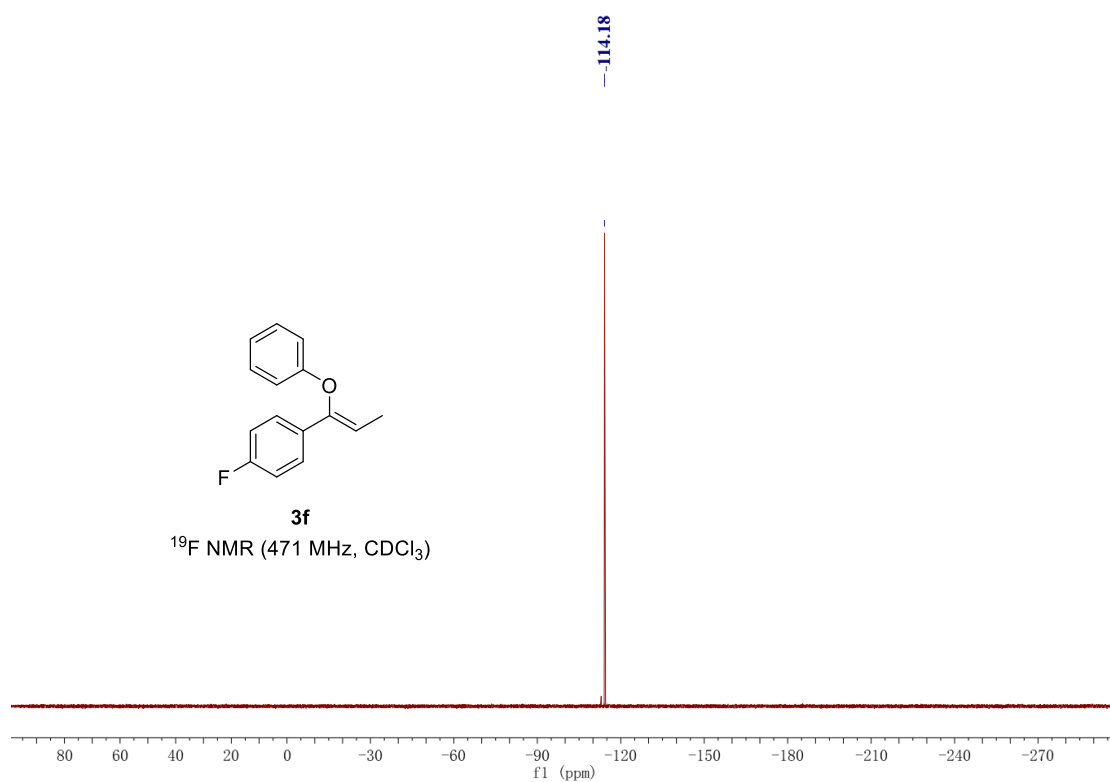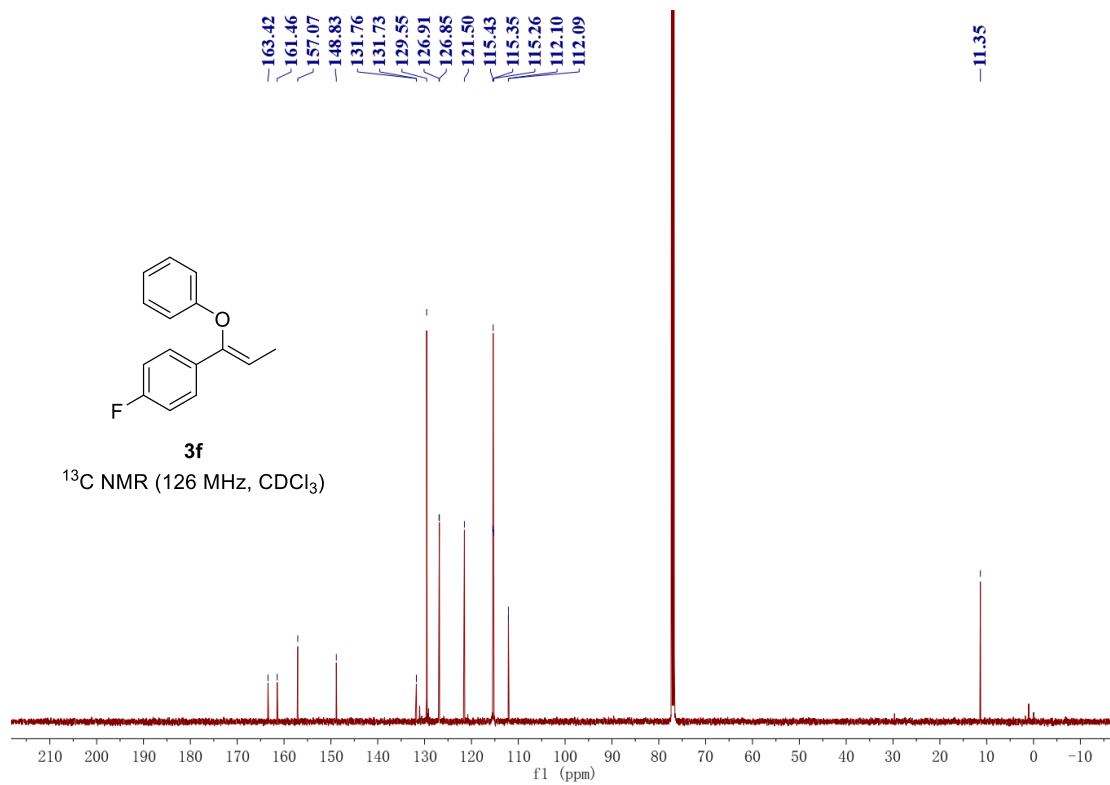



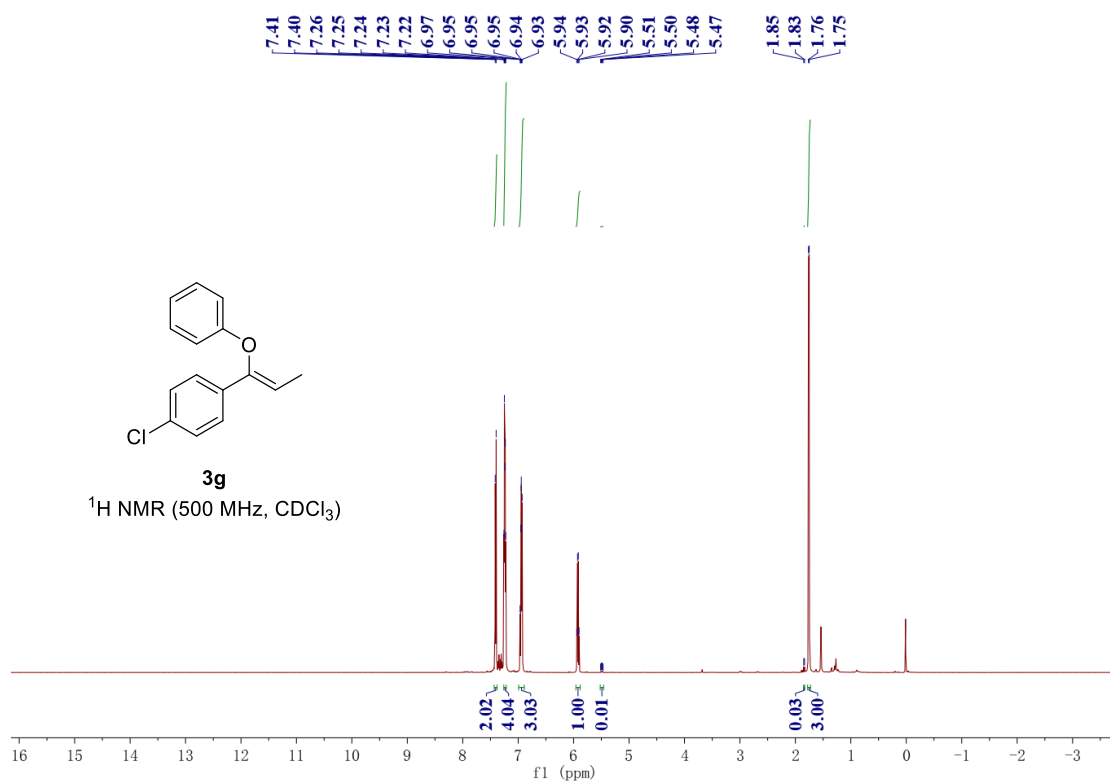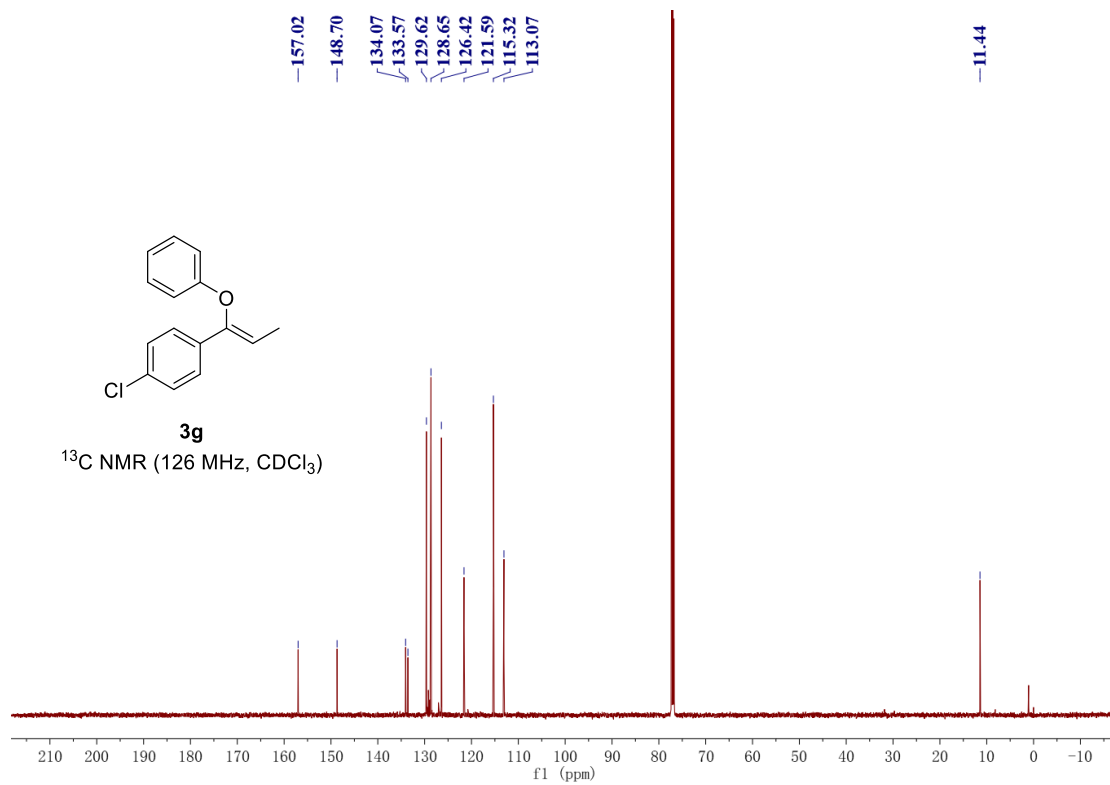

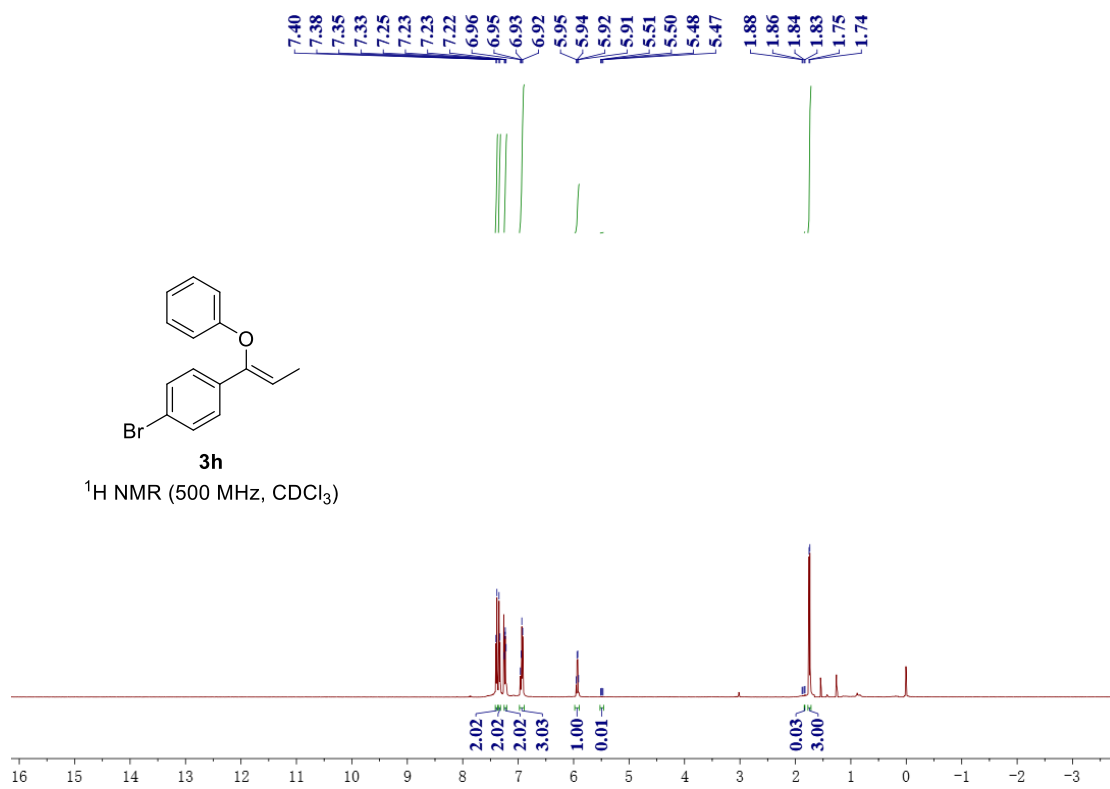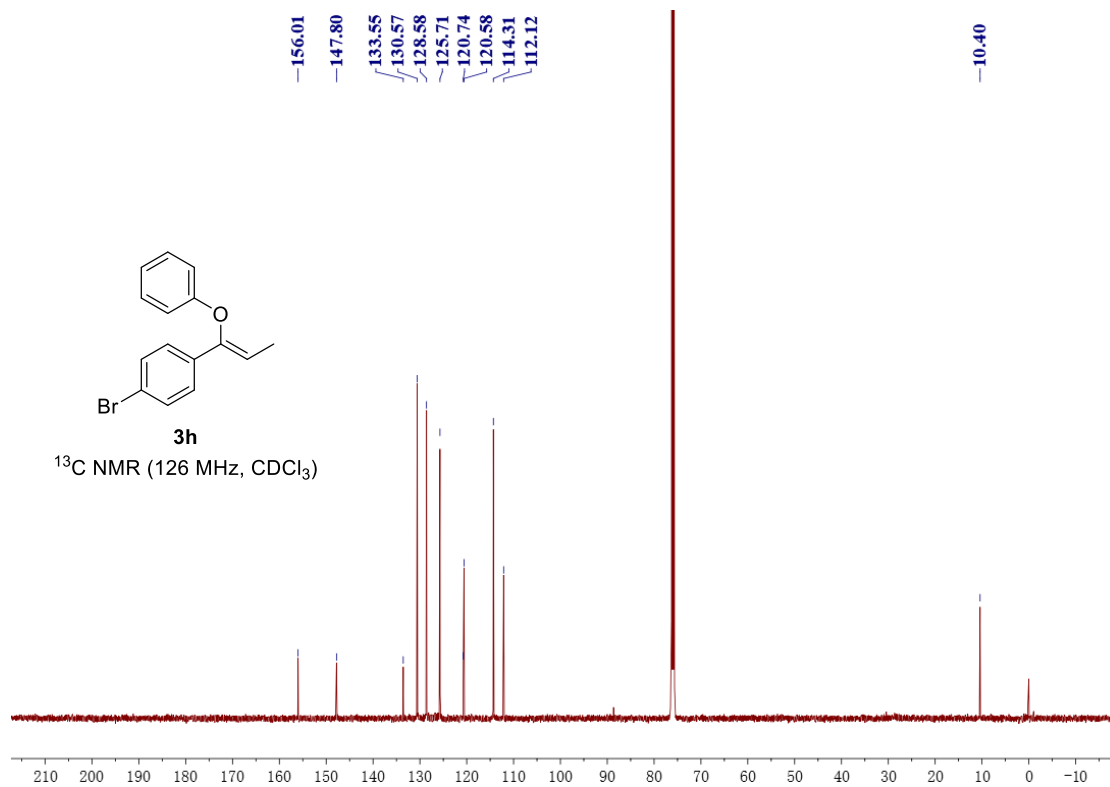

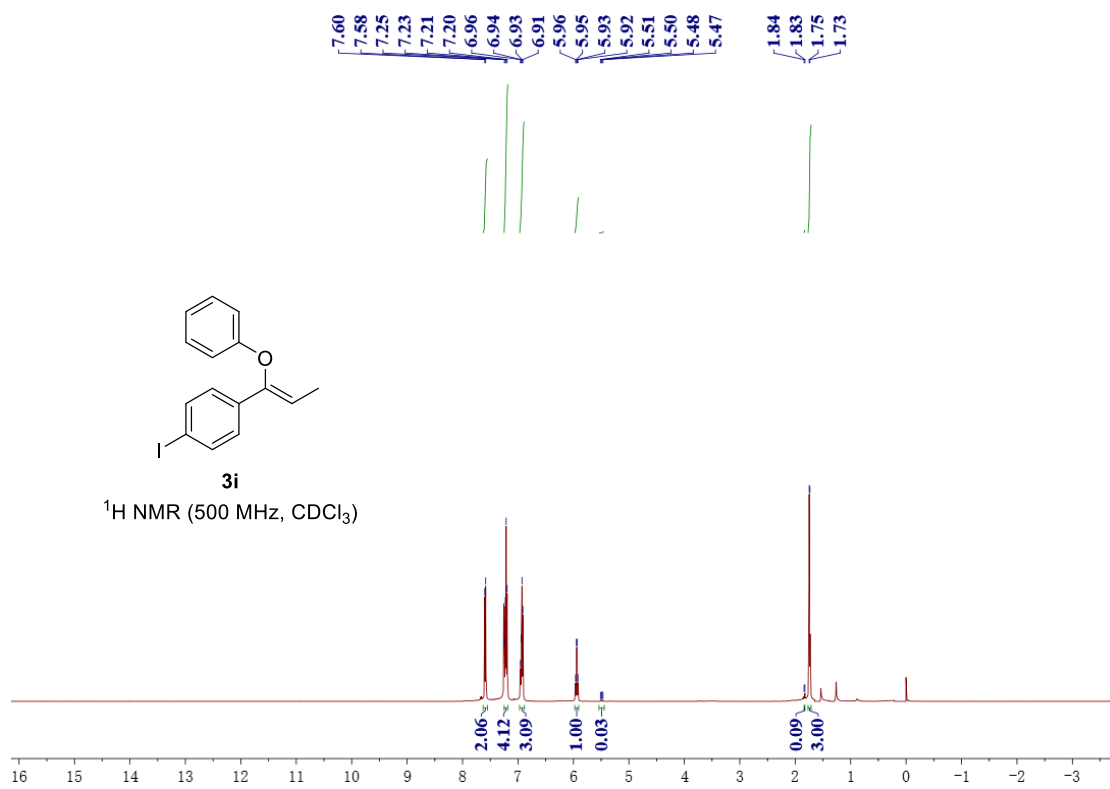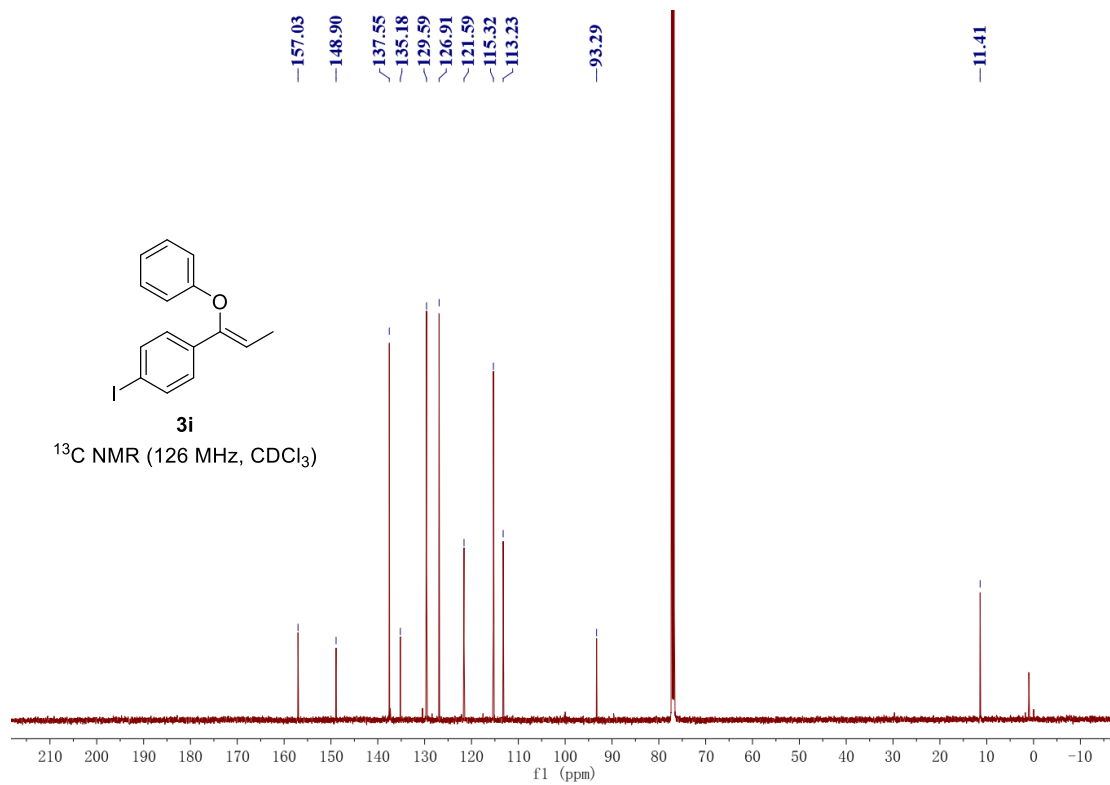

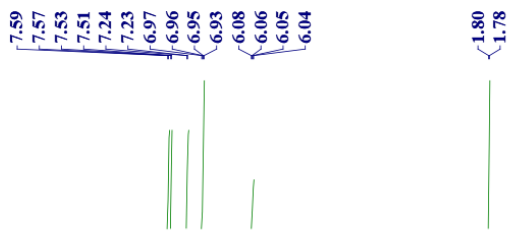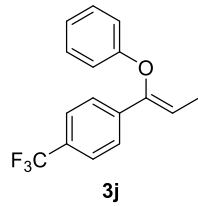

<sup>1</sup>H NMR (500 MHz, CDCl<sub>3</sub>)

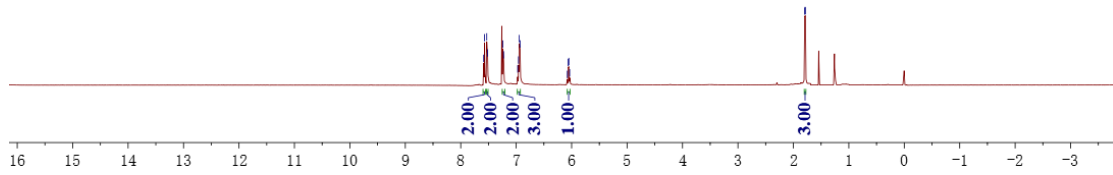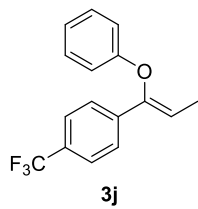

<sup>19</sup>F NMR (471 MHz, CDCl<sub>3</sub>)

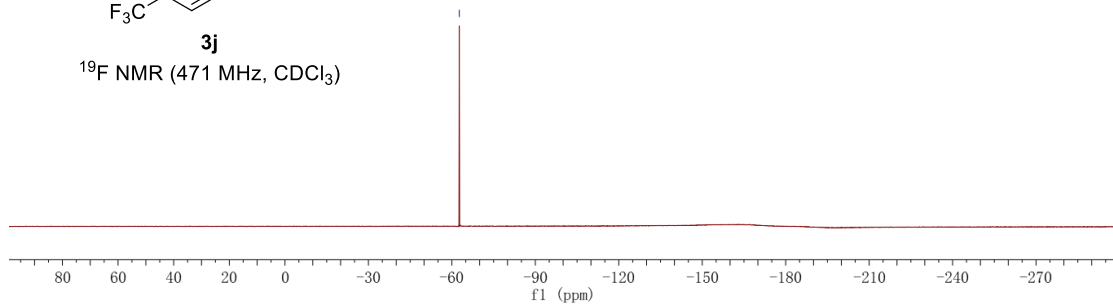

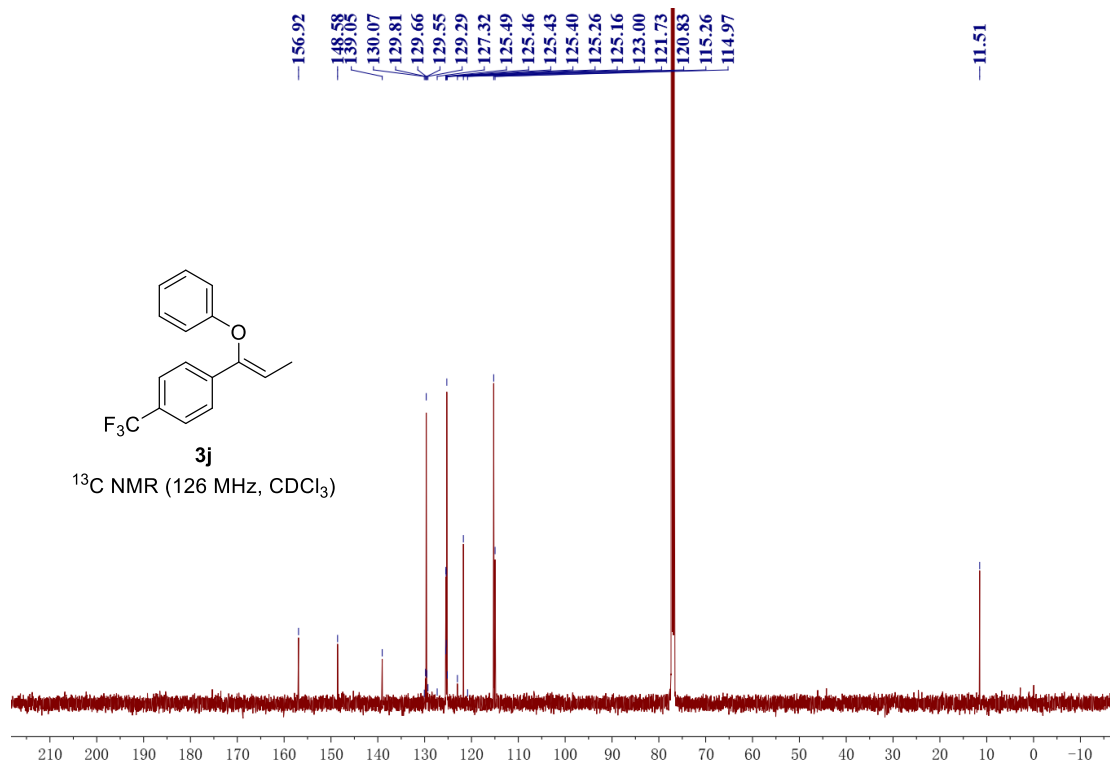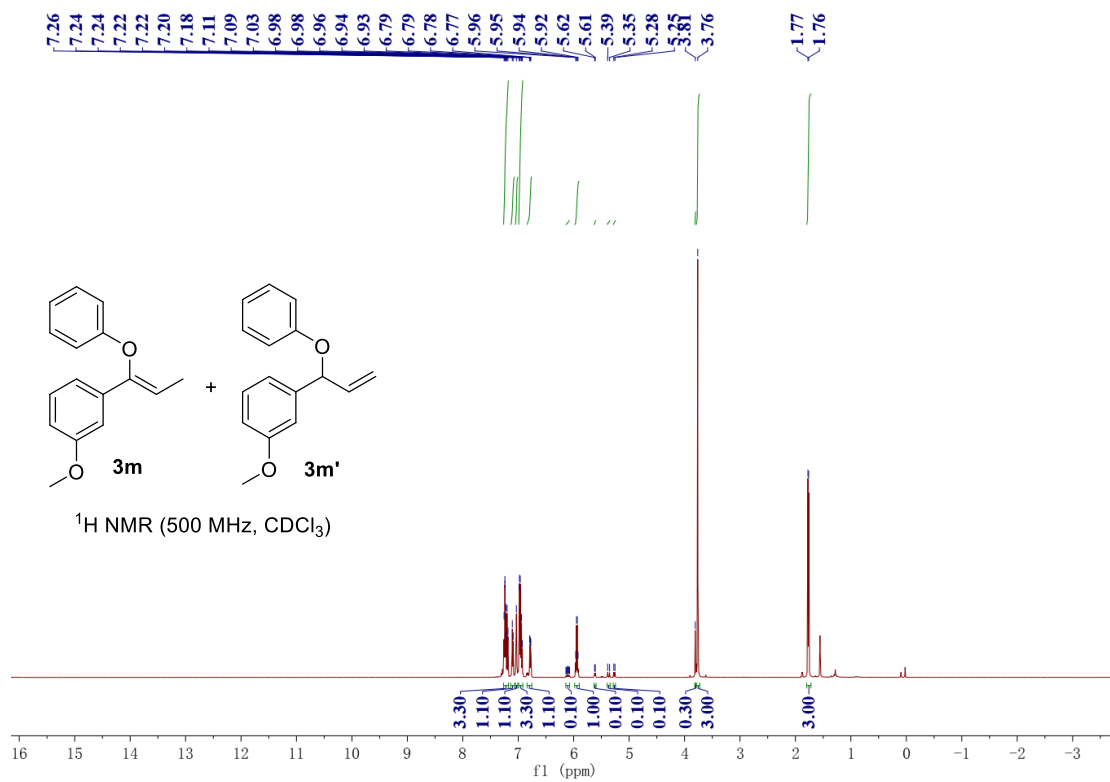

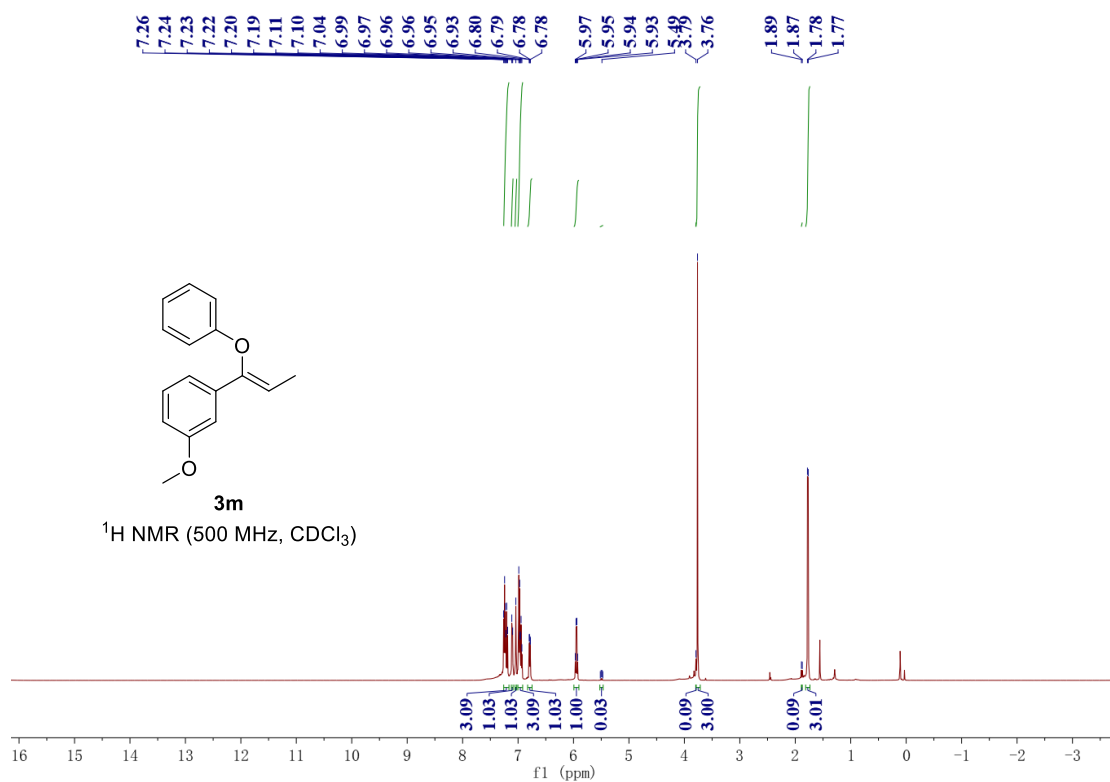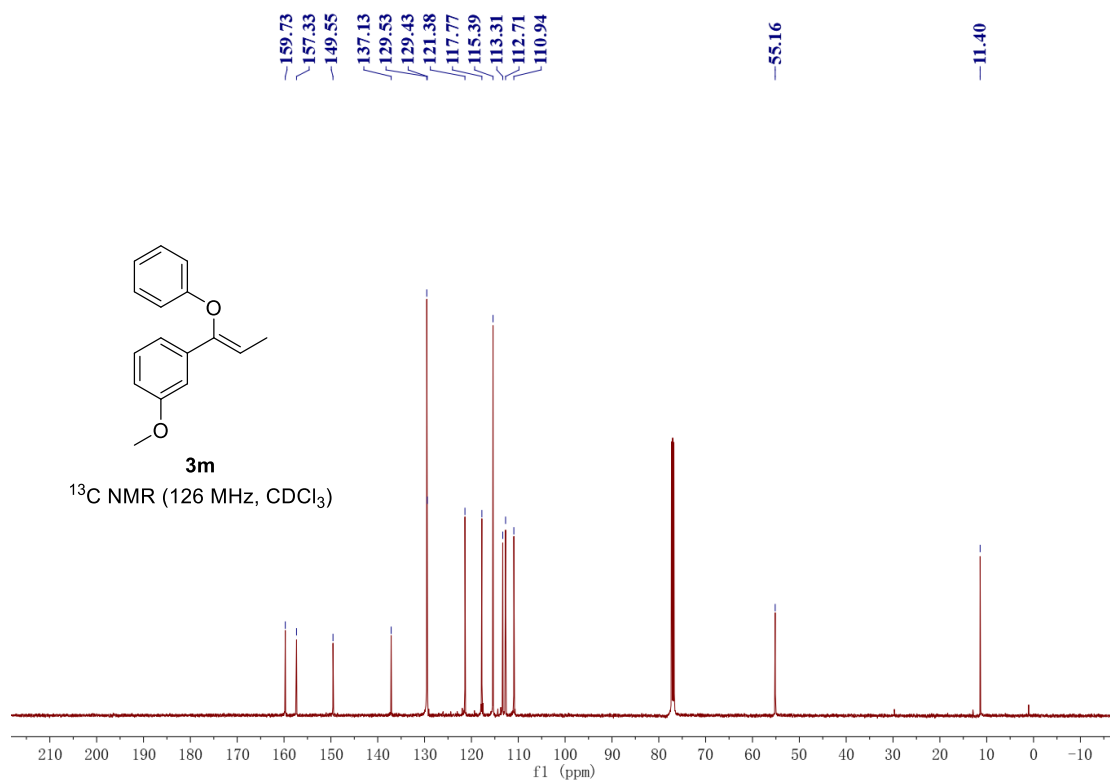

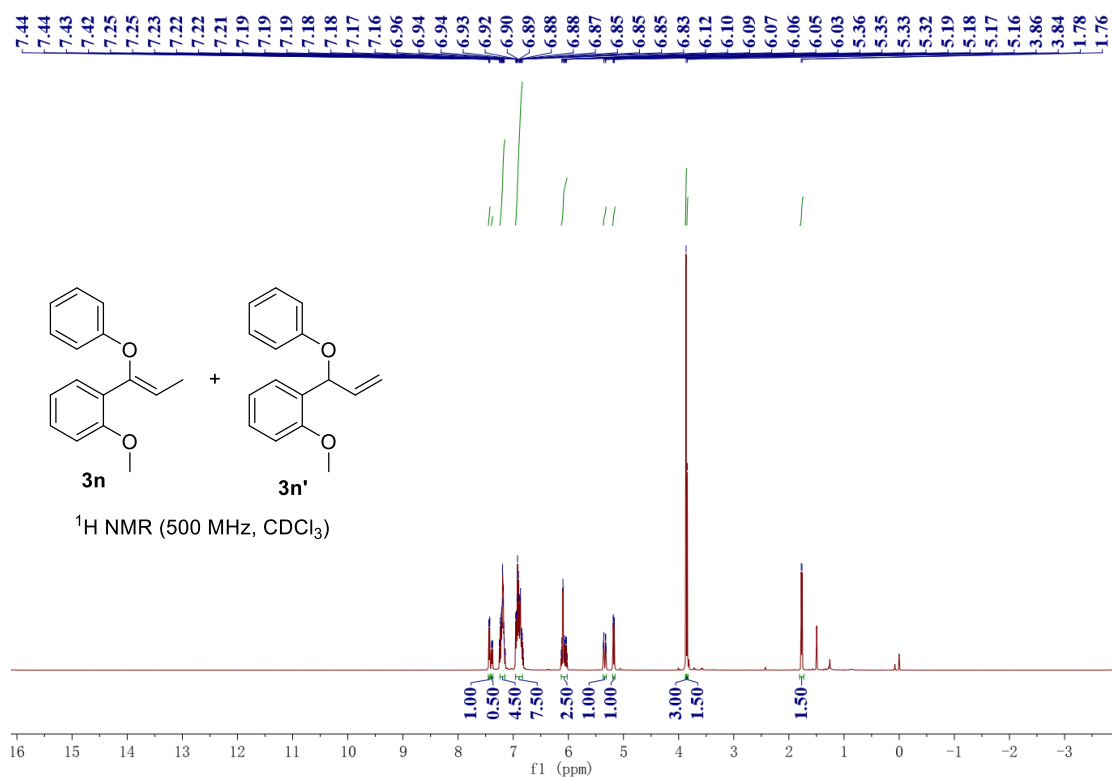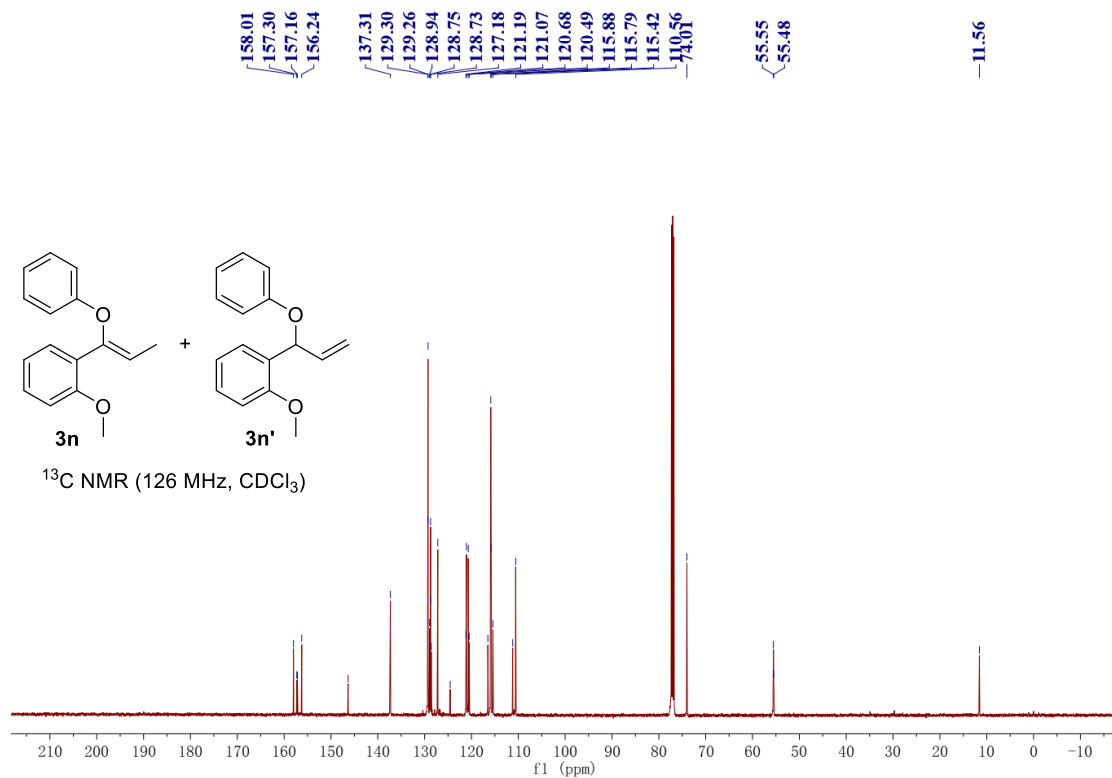

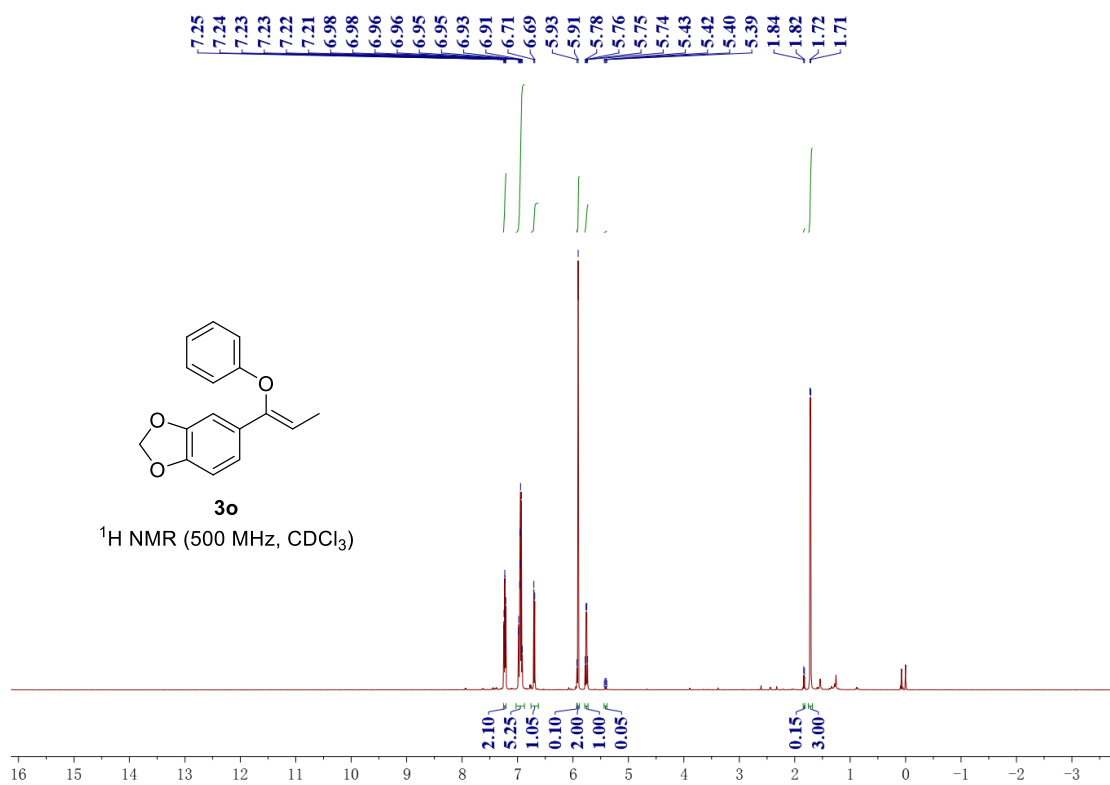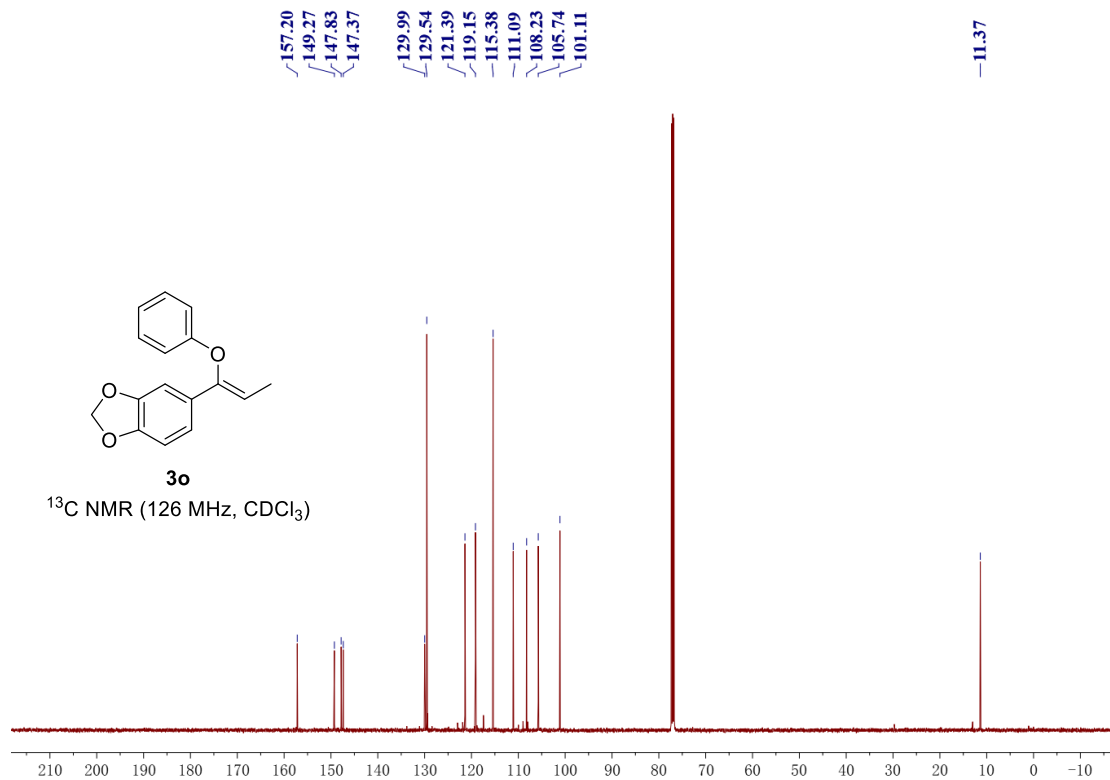



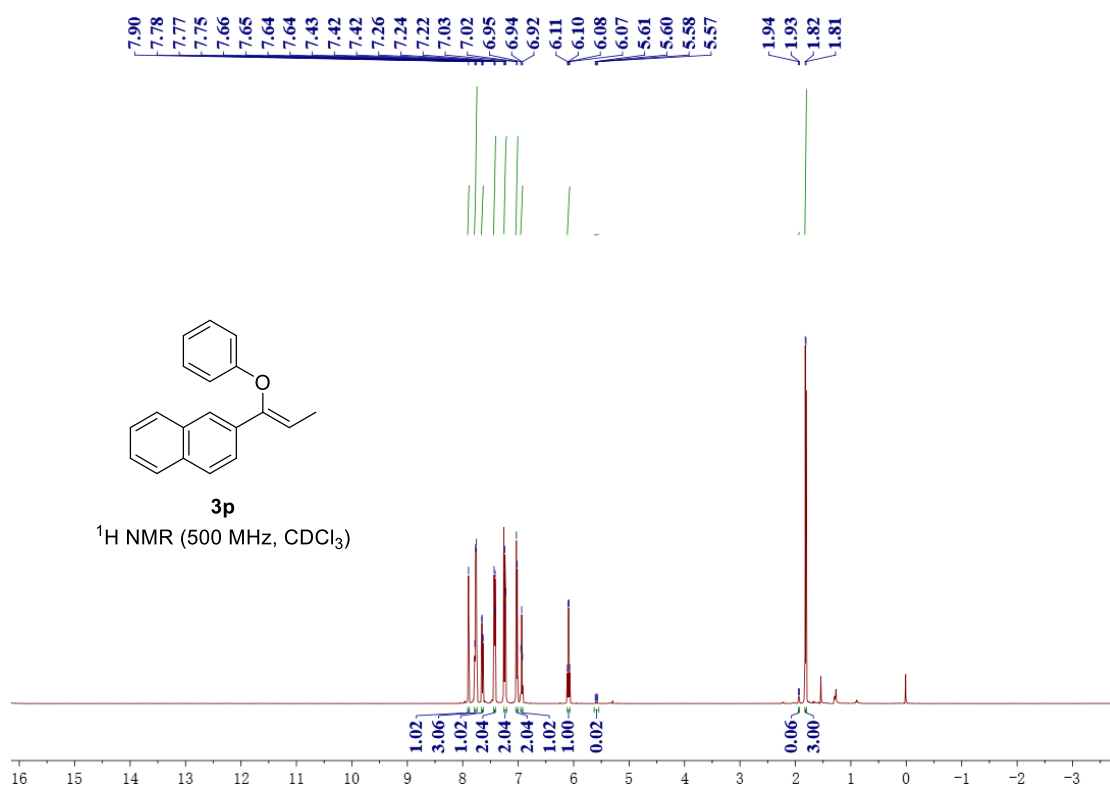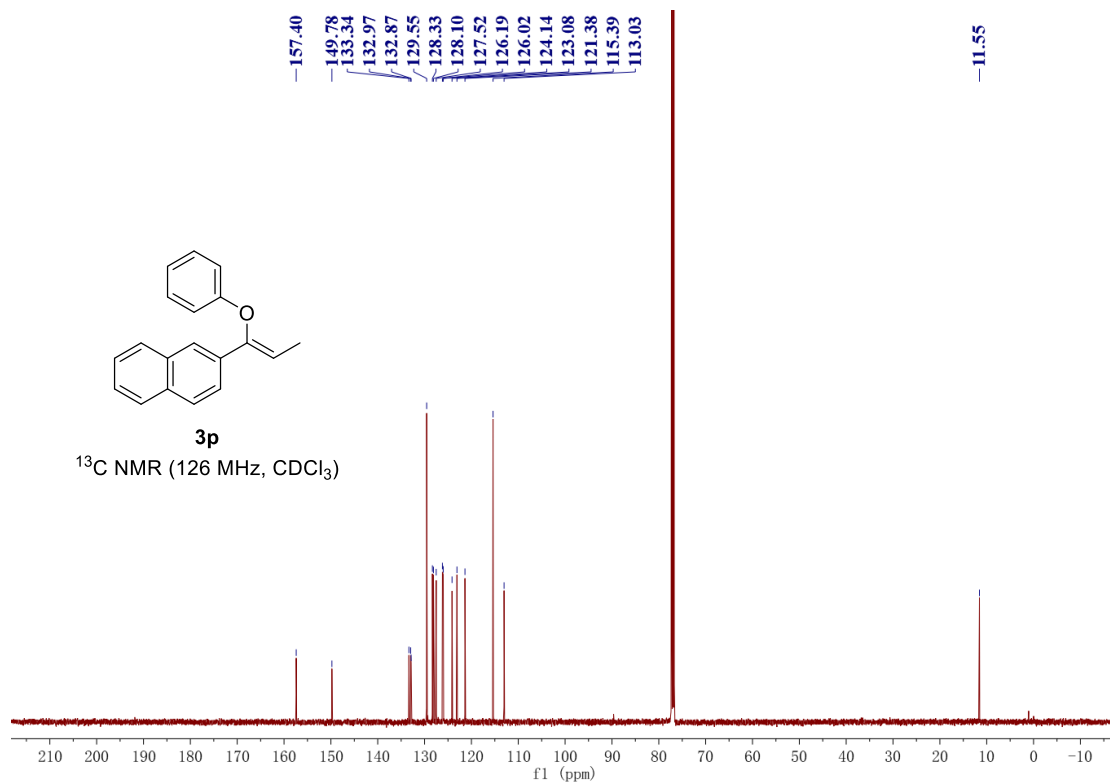

7.73  
7.72  
7.72  
7.61  
7.59  
7.29  
7.27  
7.26  
7.16  
7.05  
7.03  
7.00  
6.98  
6.97  
5.98  
5.96  
5.95  
5.93  
2.08  
2.07  
1.78  
1.76

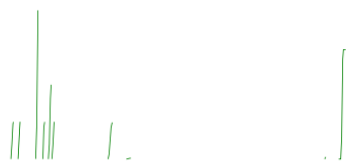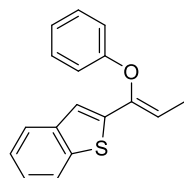

**3q**

<sup>1</sup>H NMR (500 MHz, CDCl<sub>3</sub>)

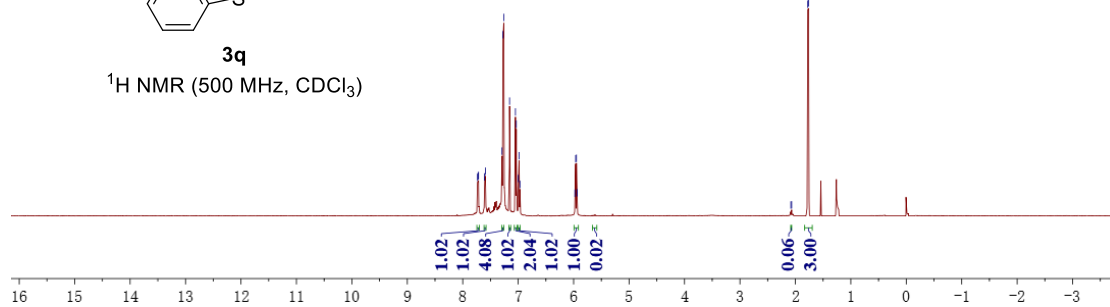

157.23  
145.33  
139.98  
139.29  
138.94  
129.64  
124.63  
124.41  
123.73  
122.01  
121.75  
120.69  
115.08  
114.99  
11.41

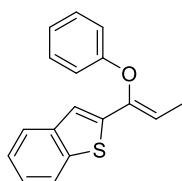

**3q**

<sup>13</sup>C NMR (126 MHz, CDCl<sub>3</sub>)

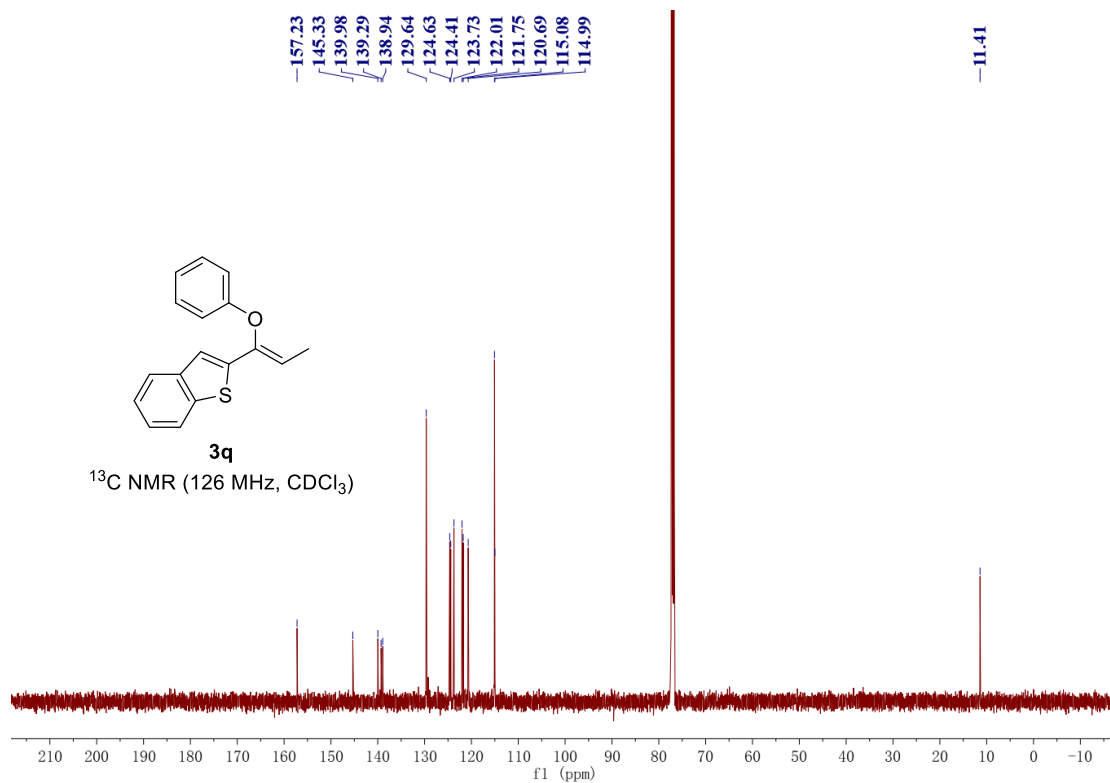

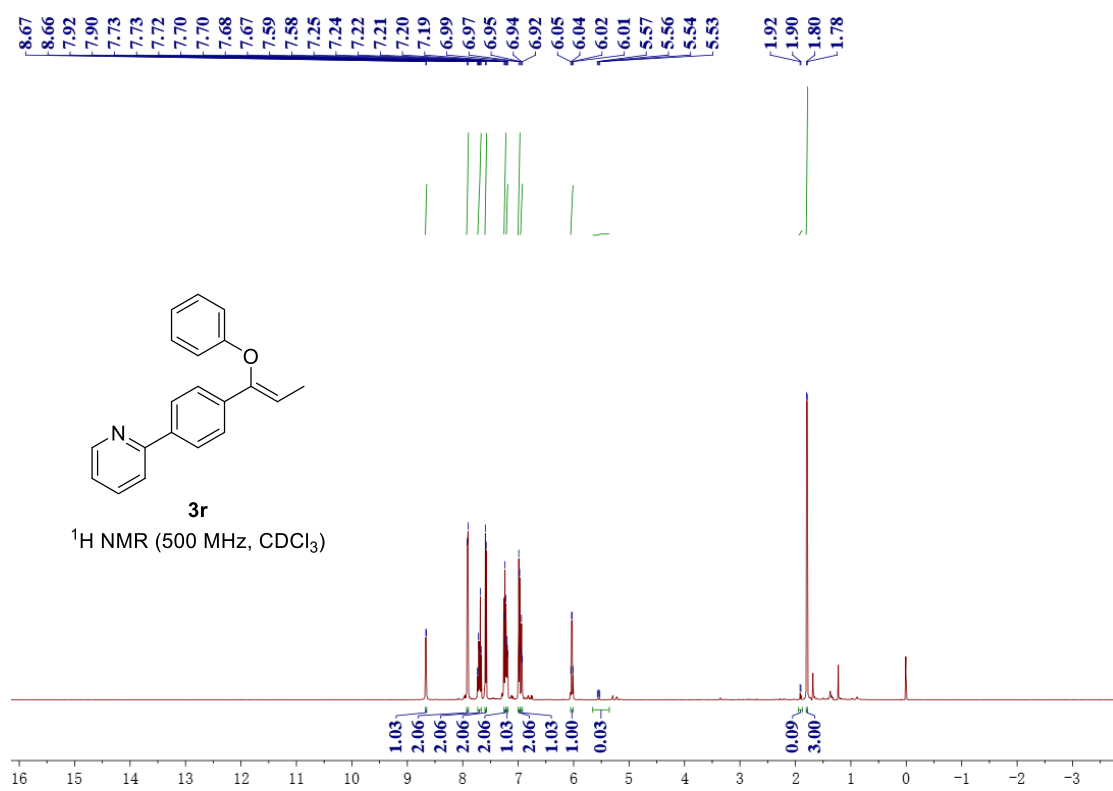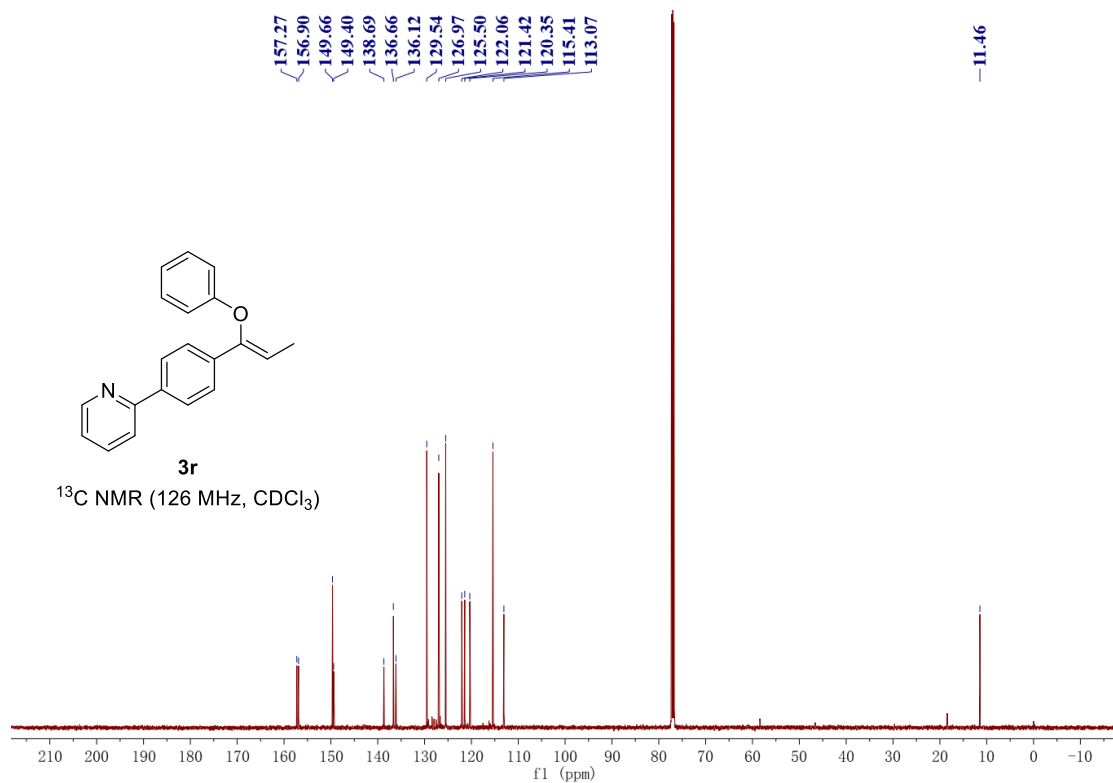

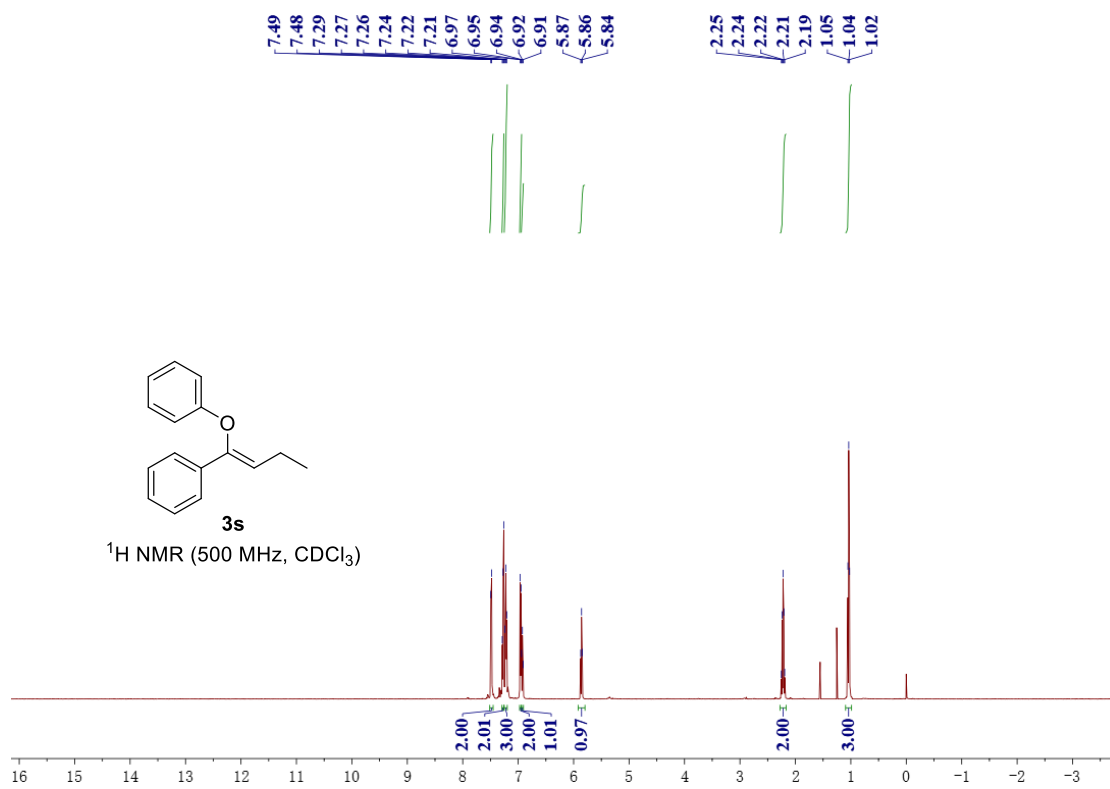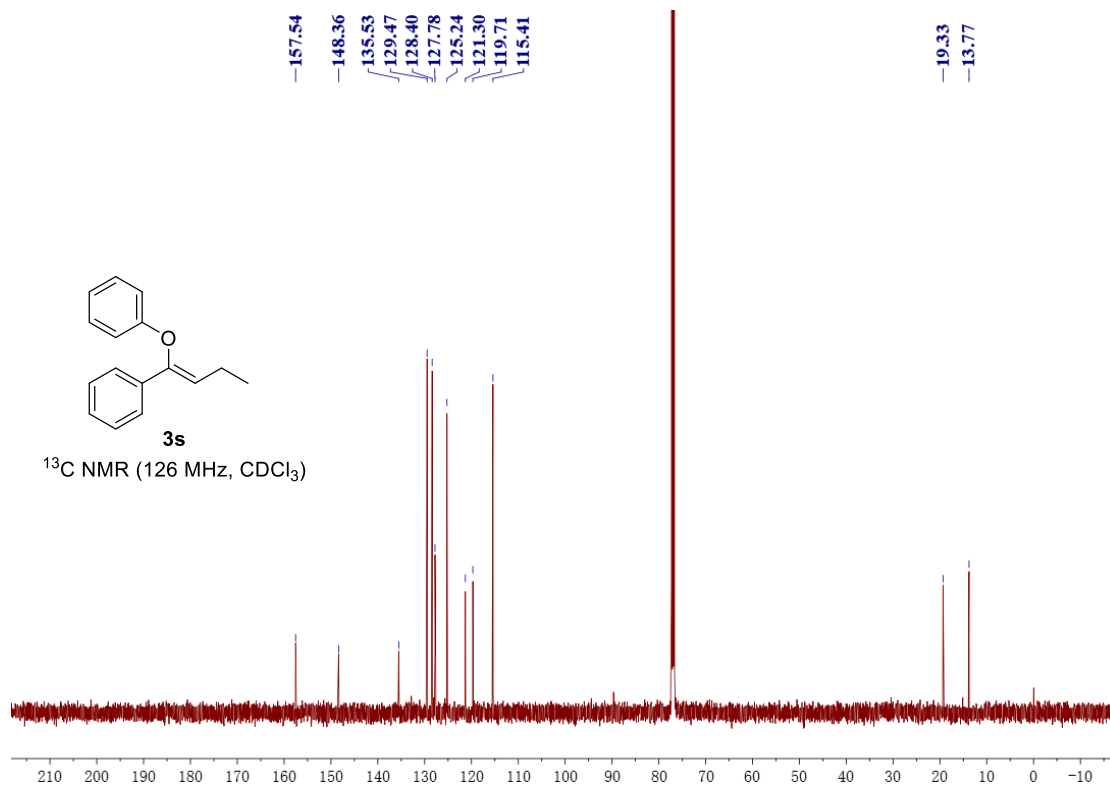

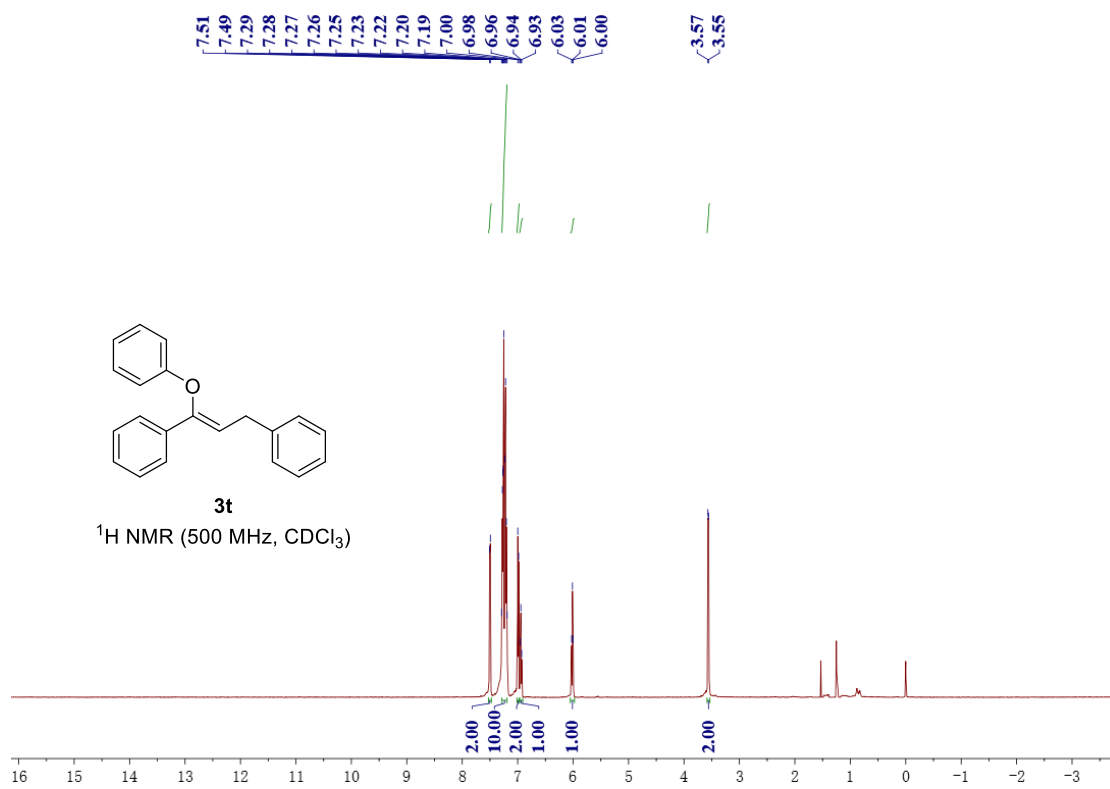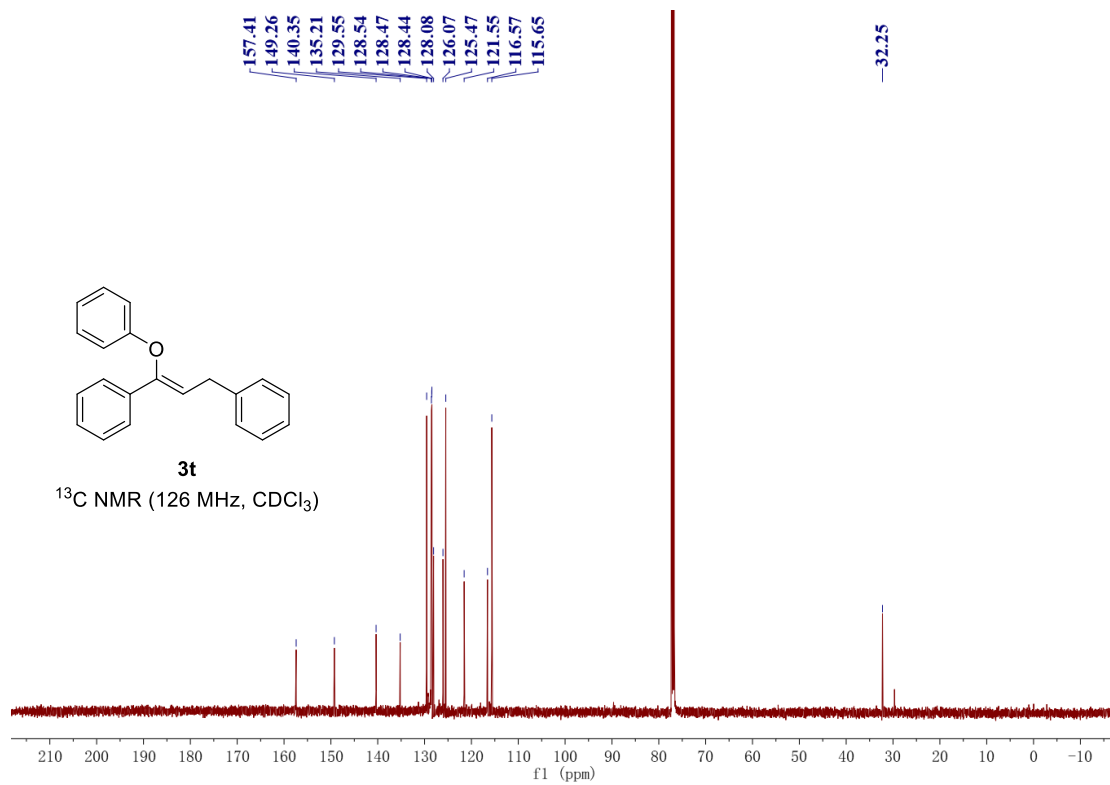

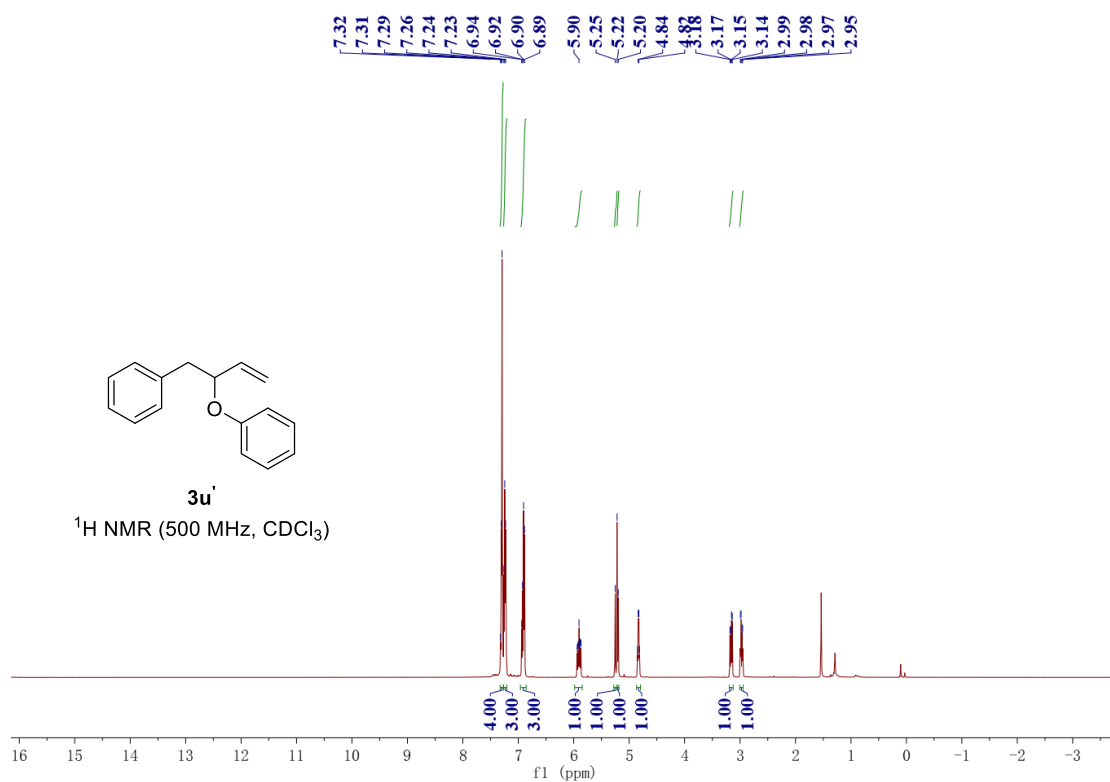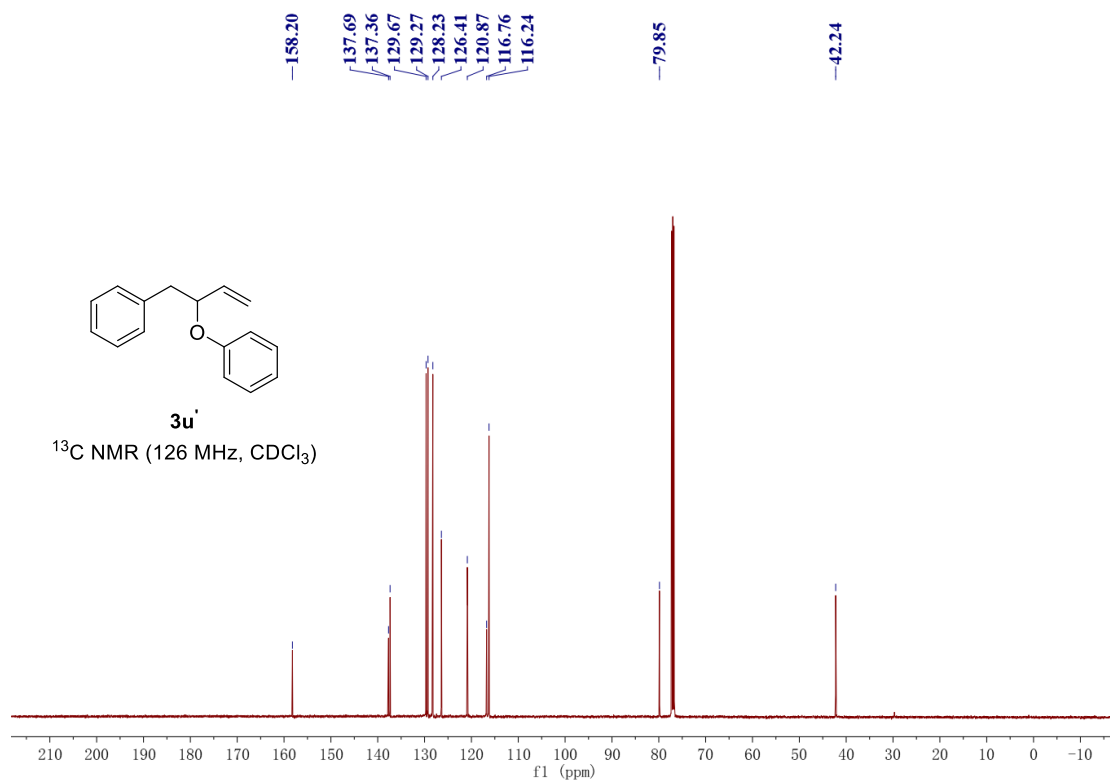

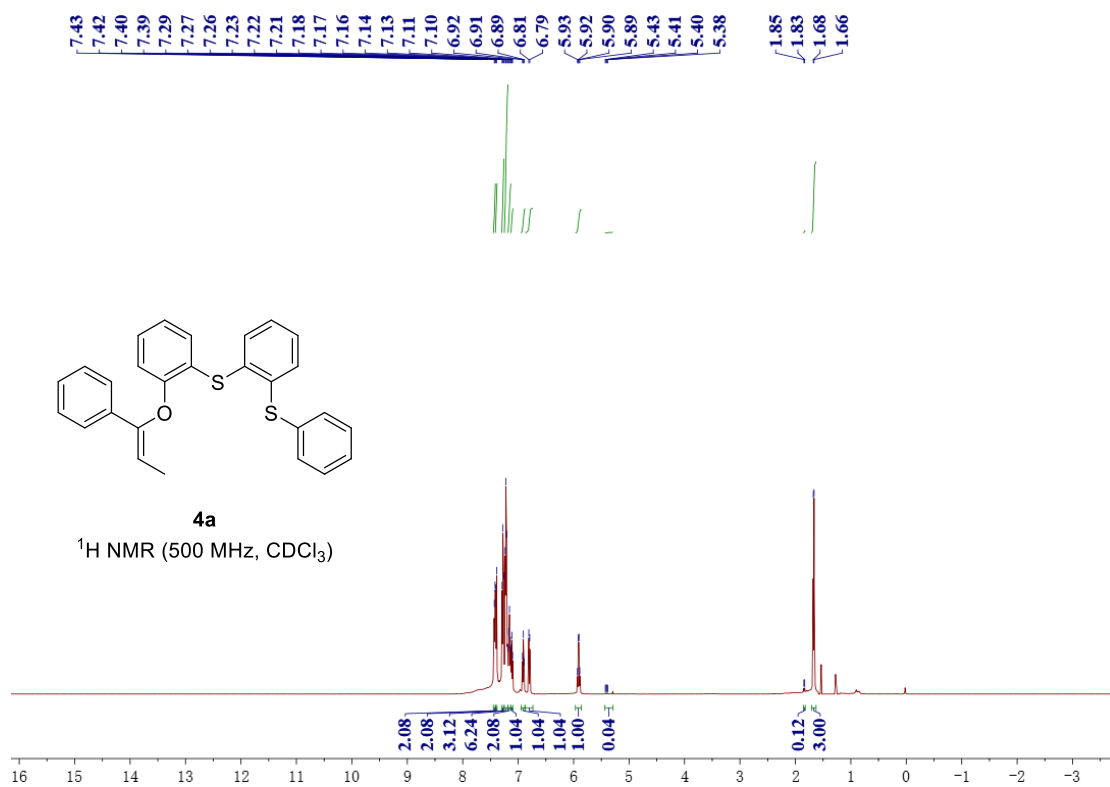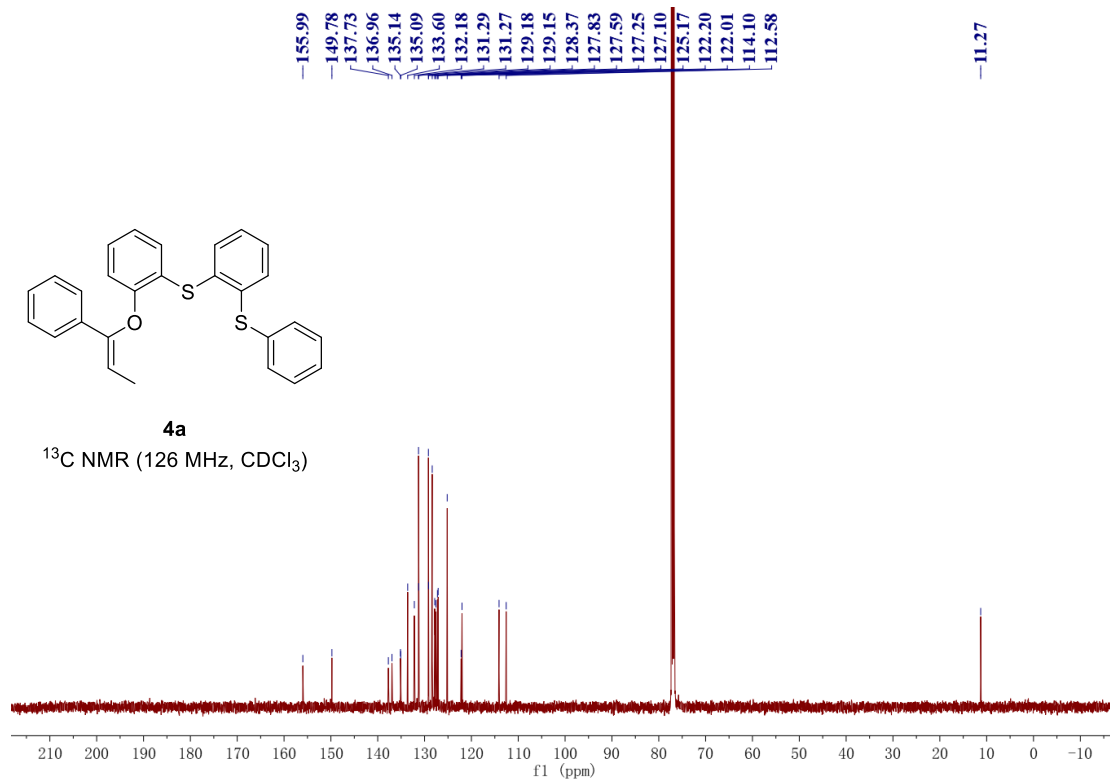

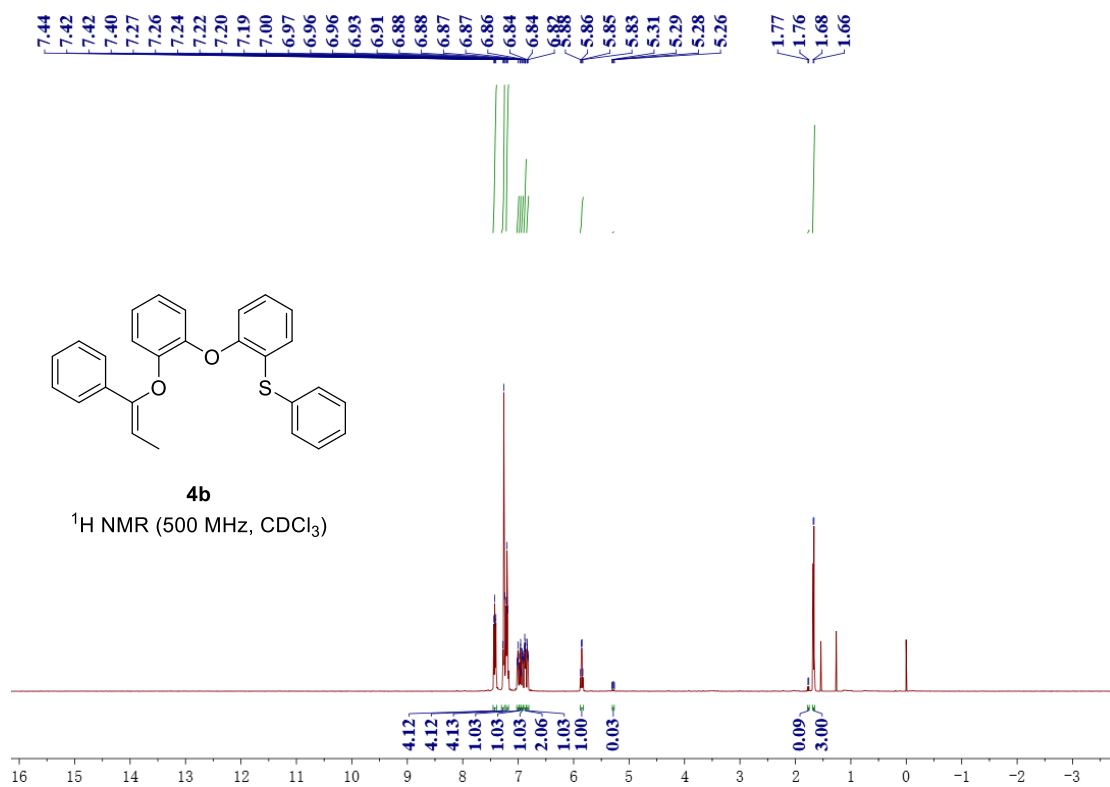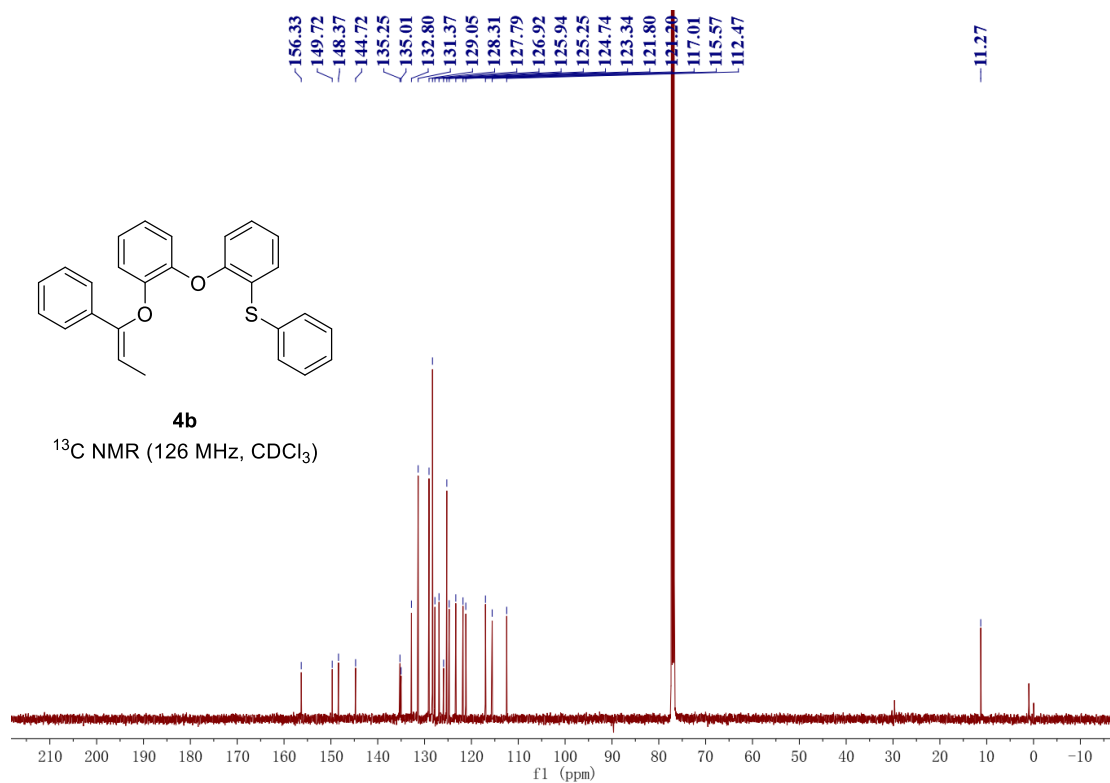



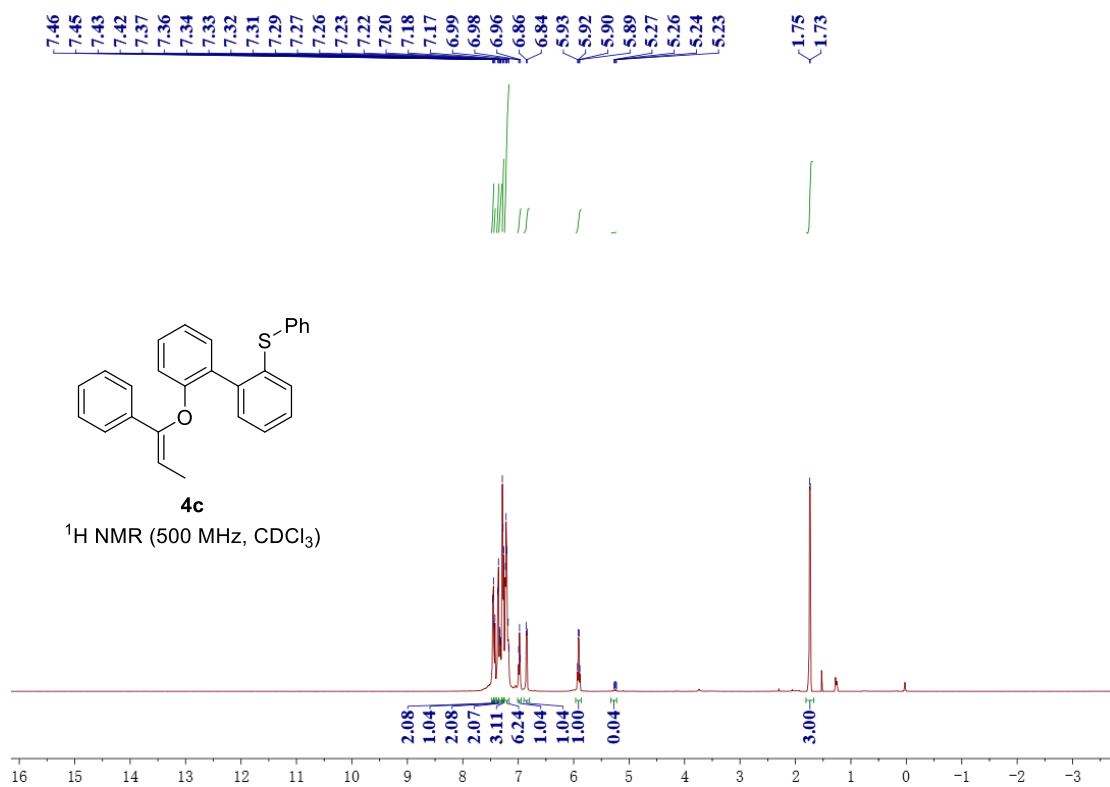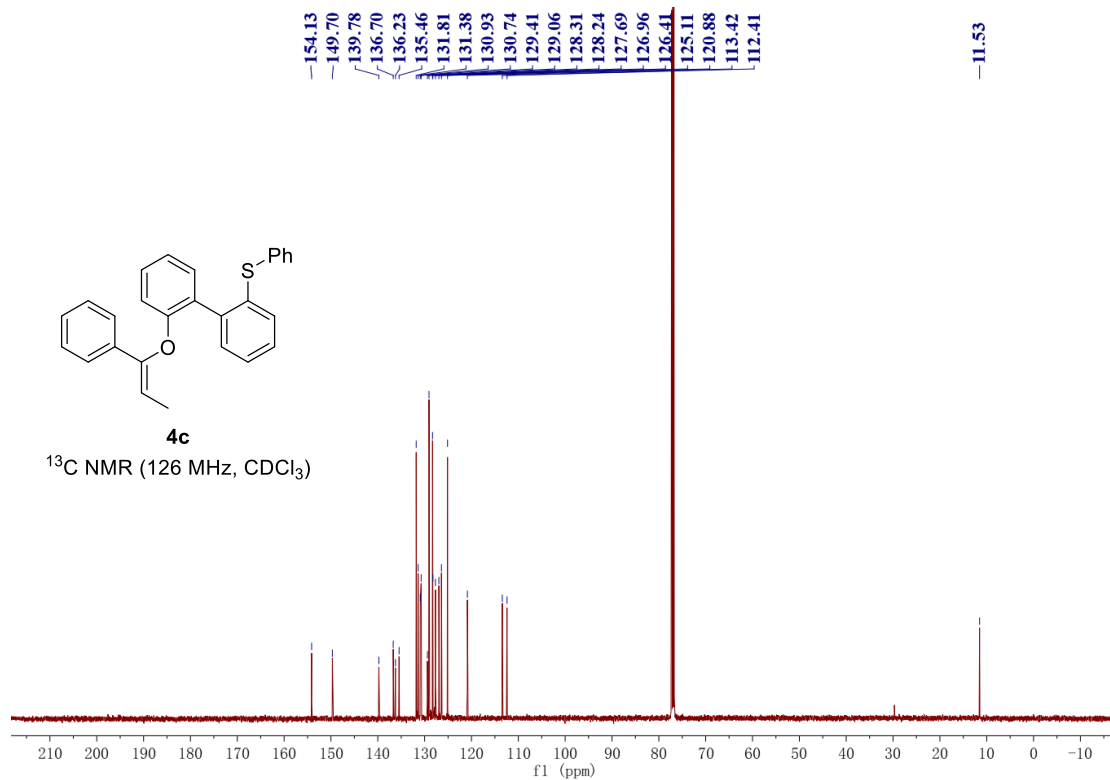

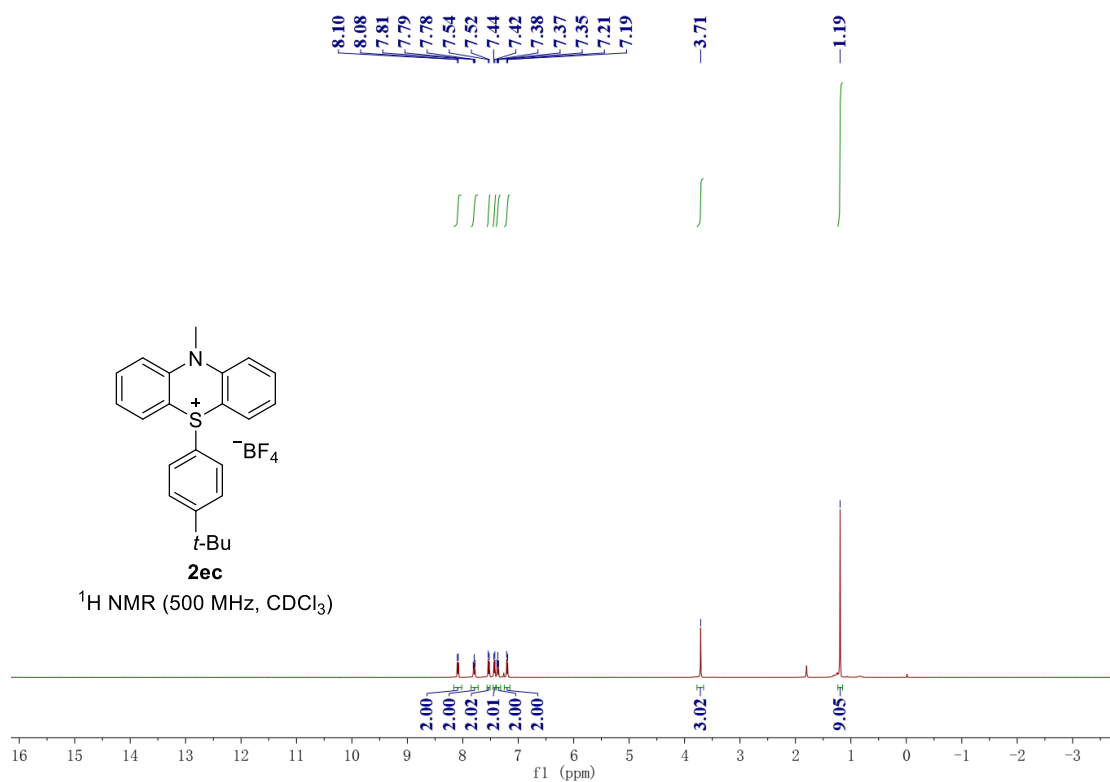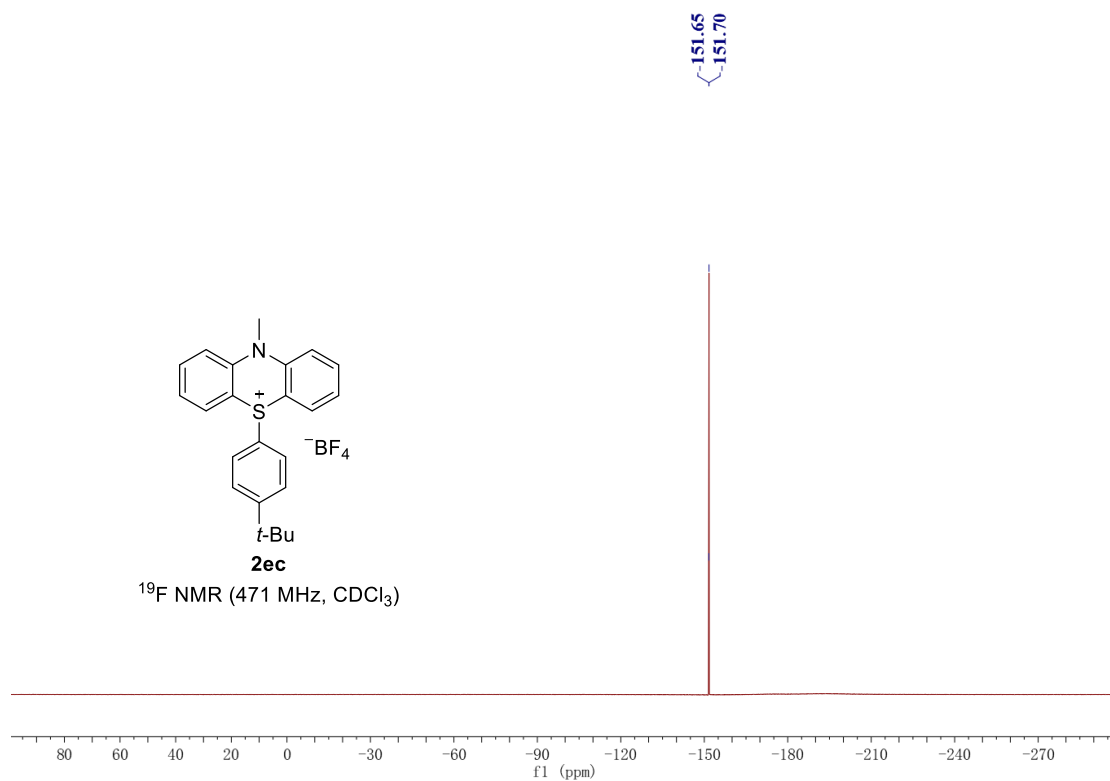

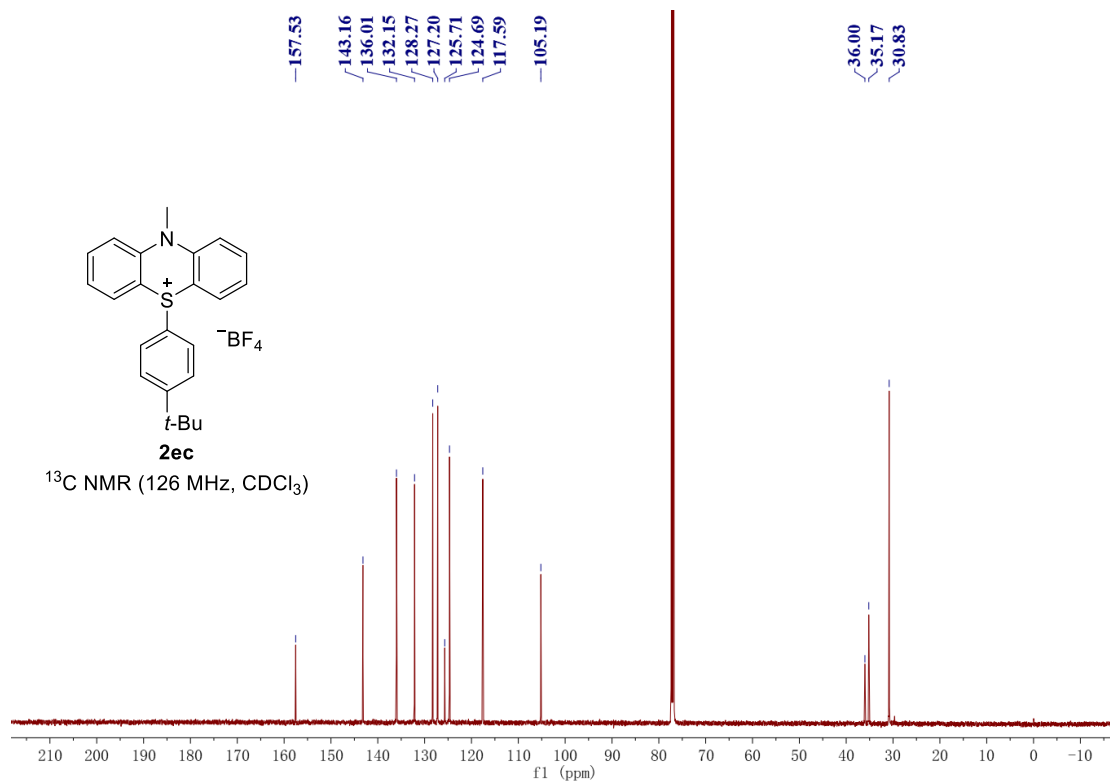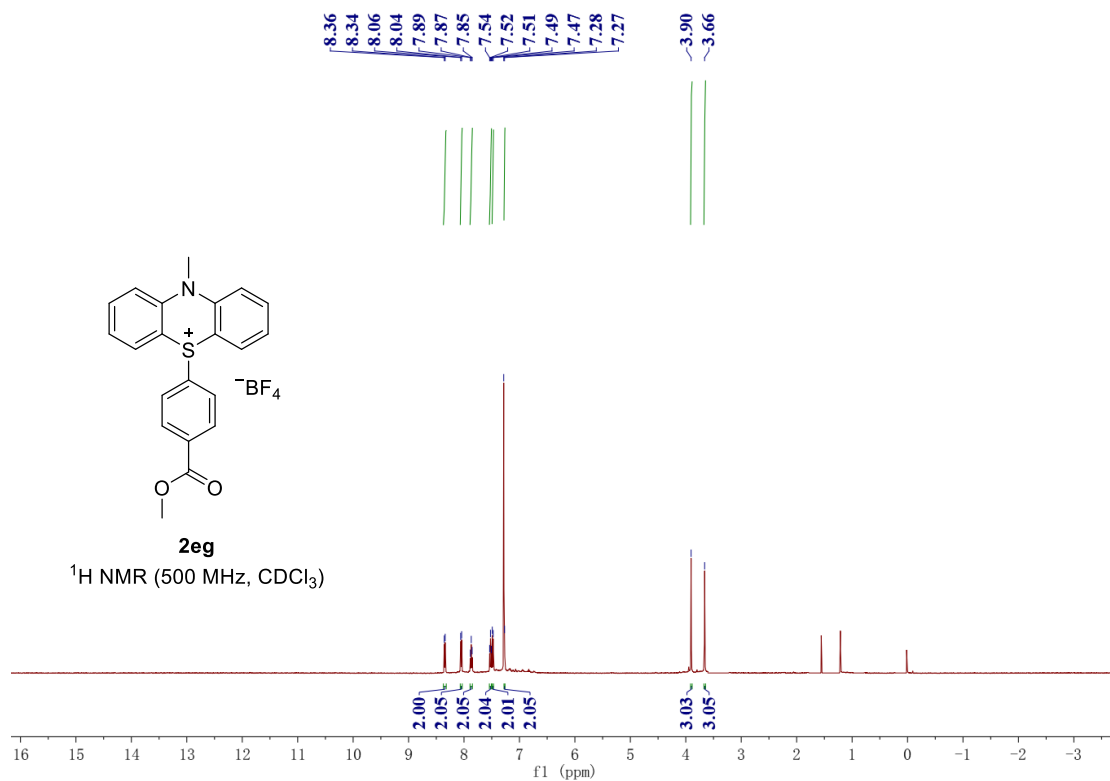

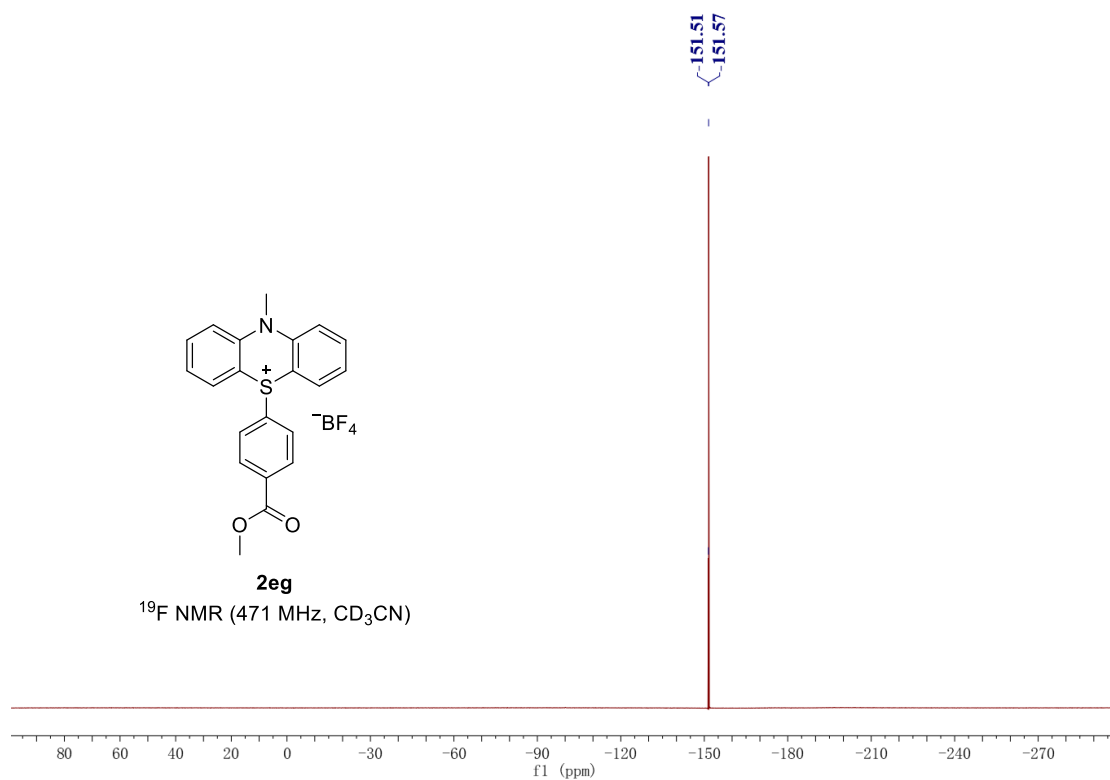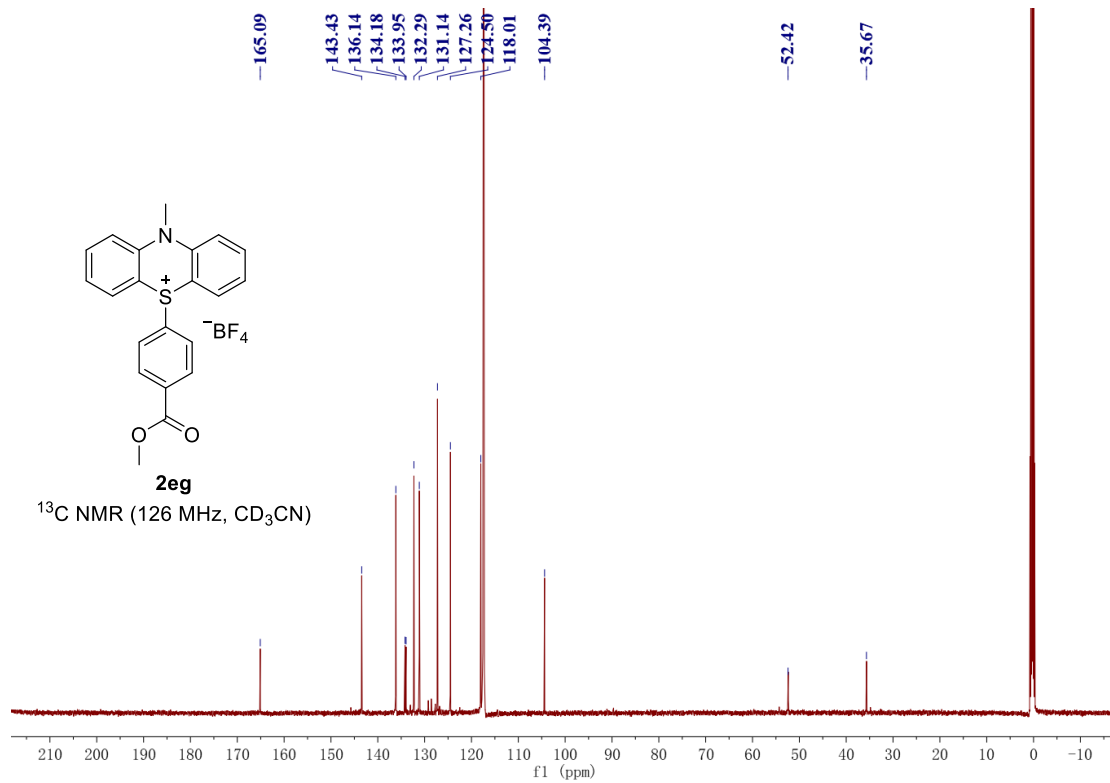

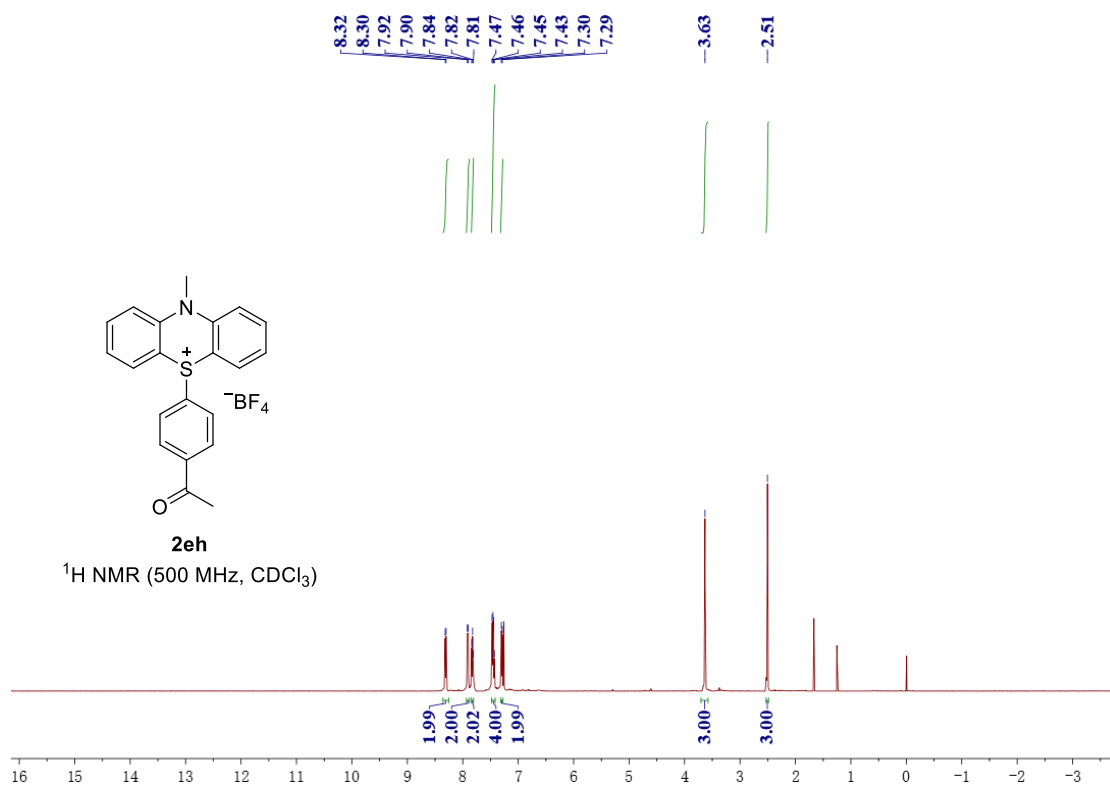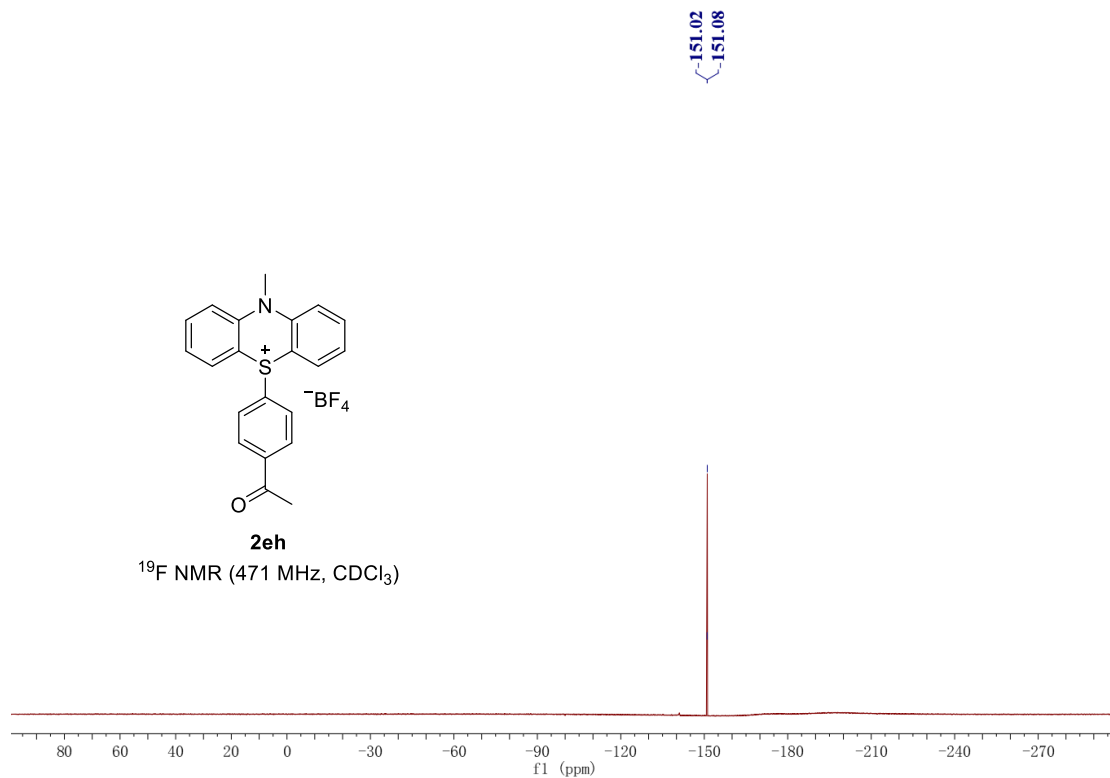

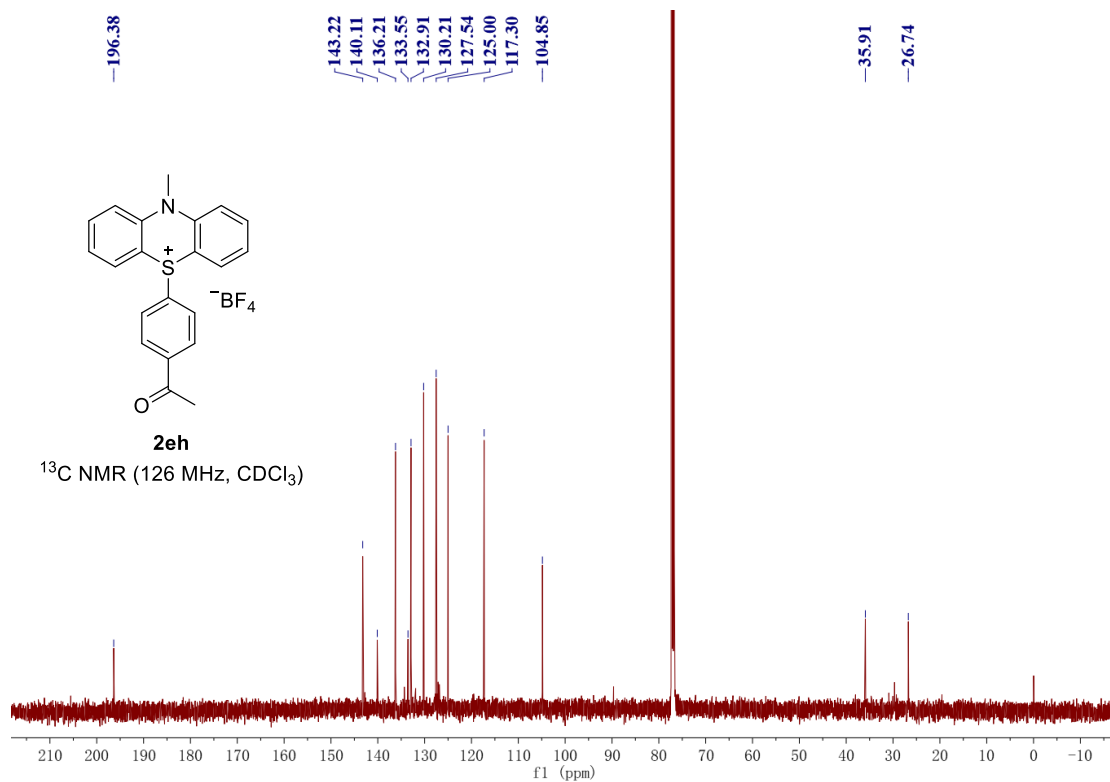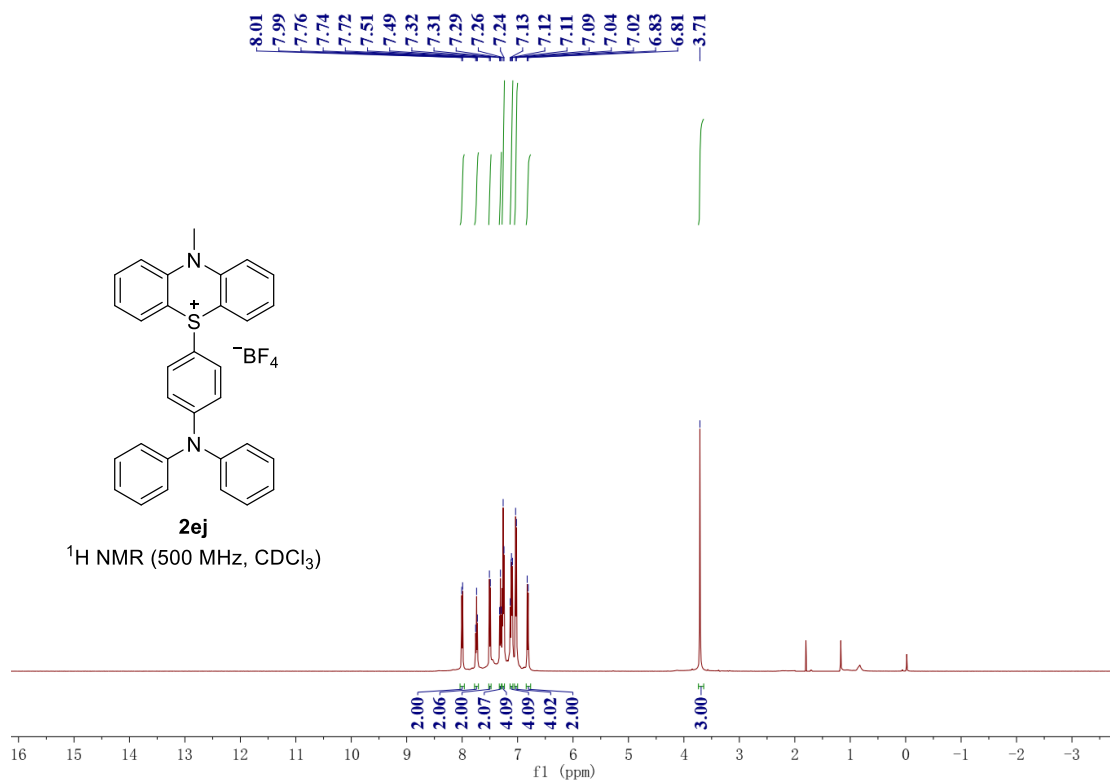

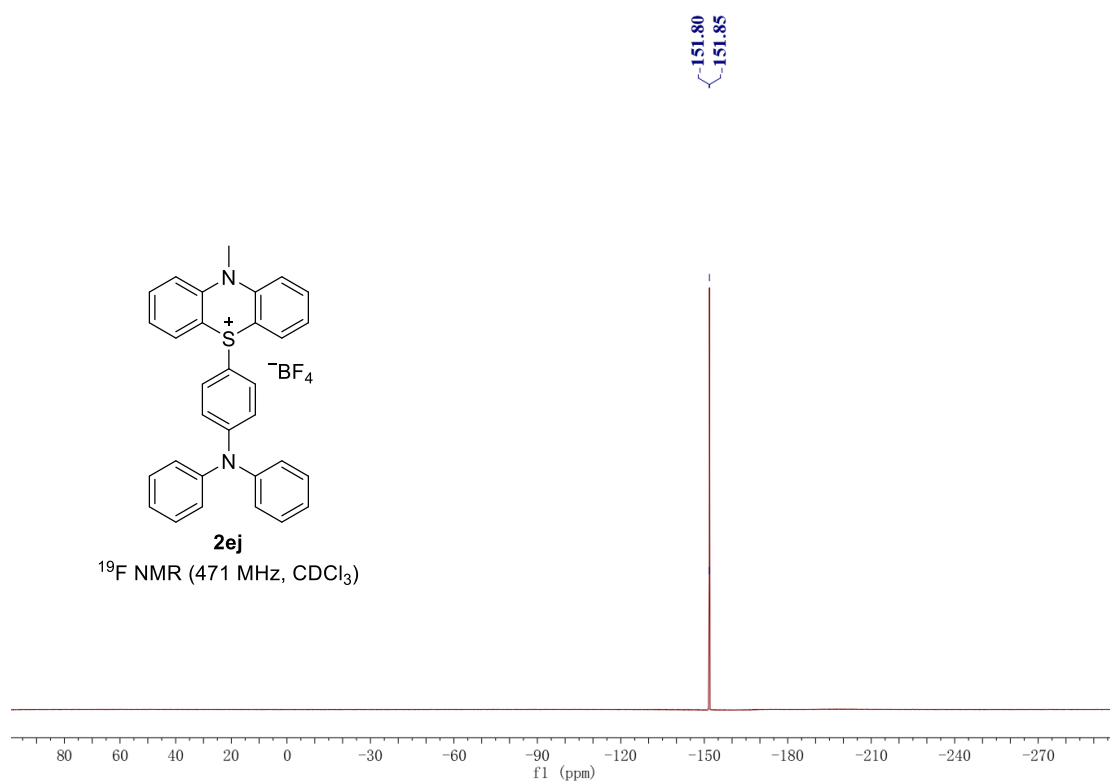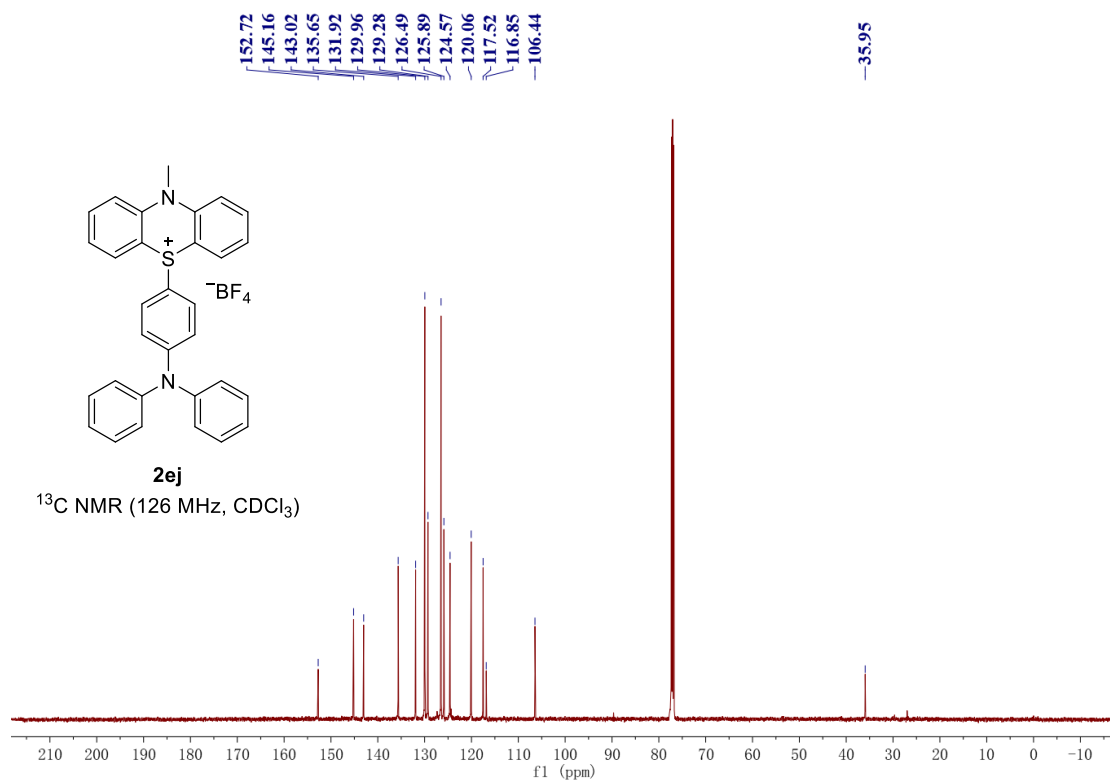

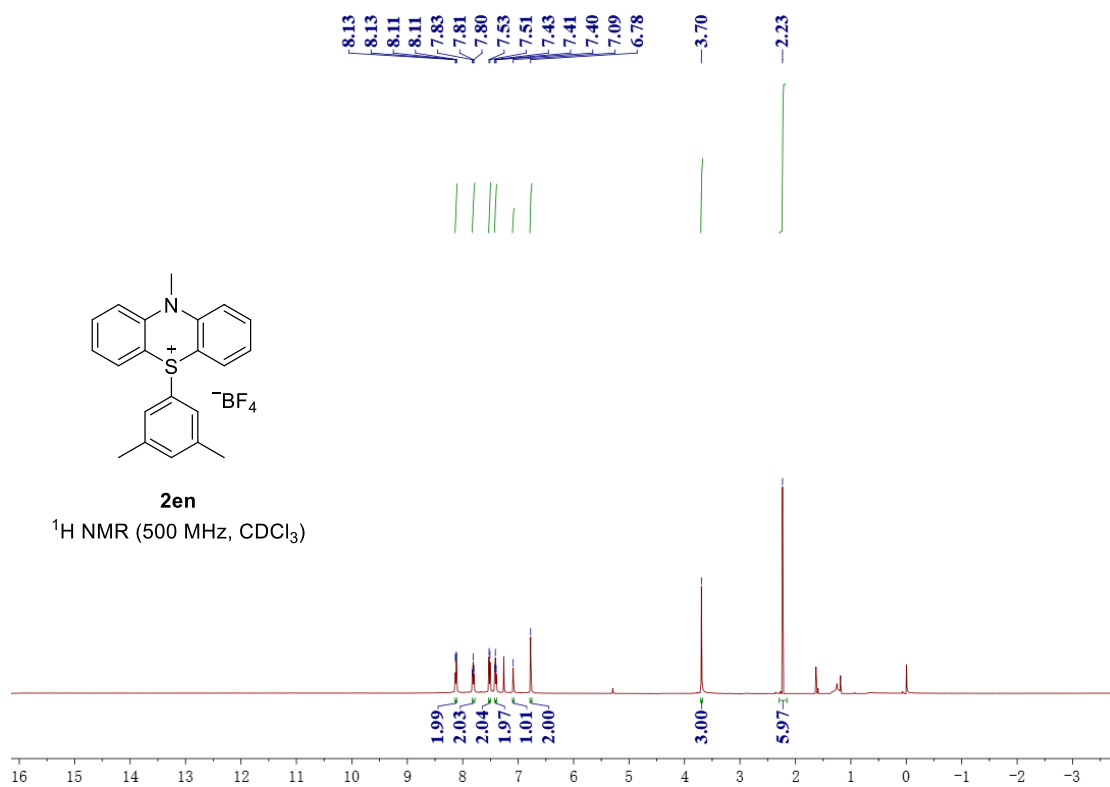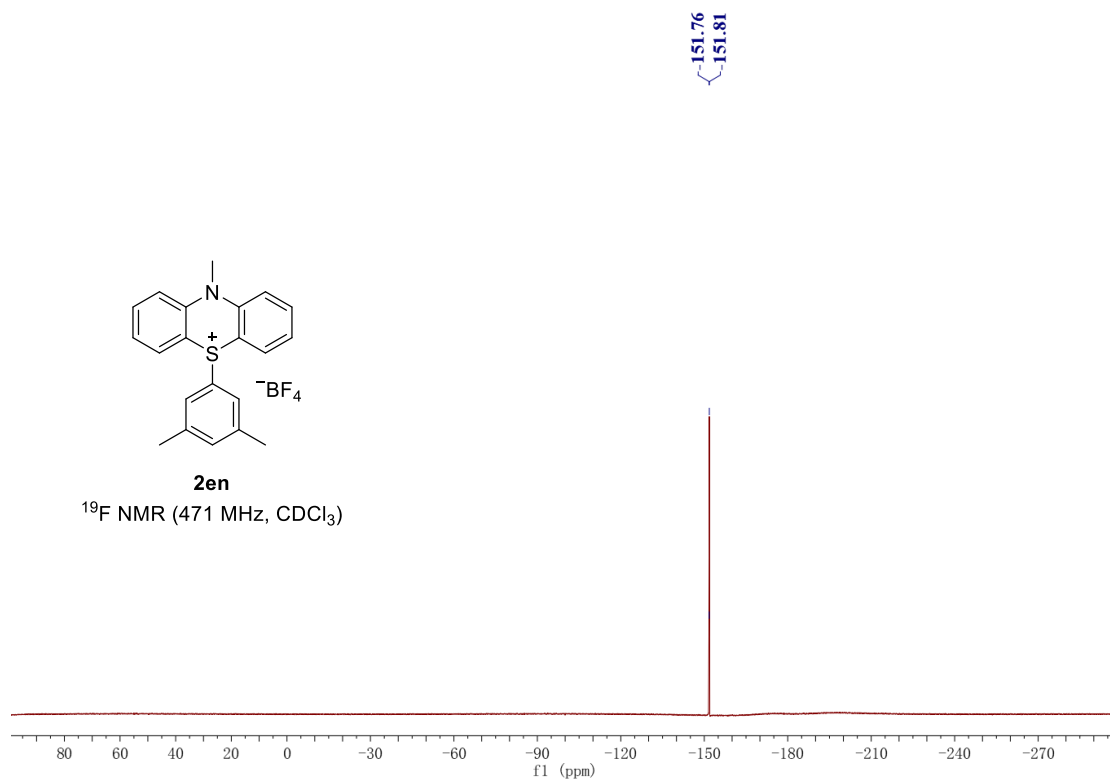



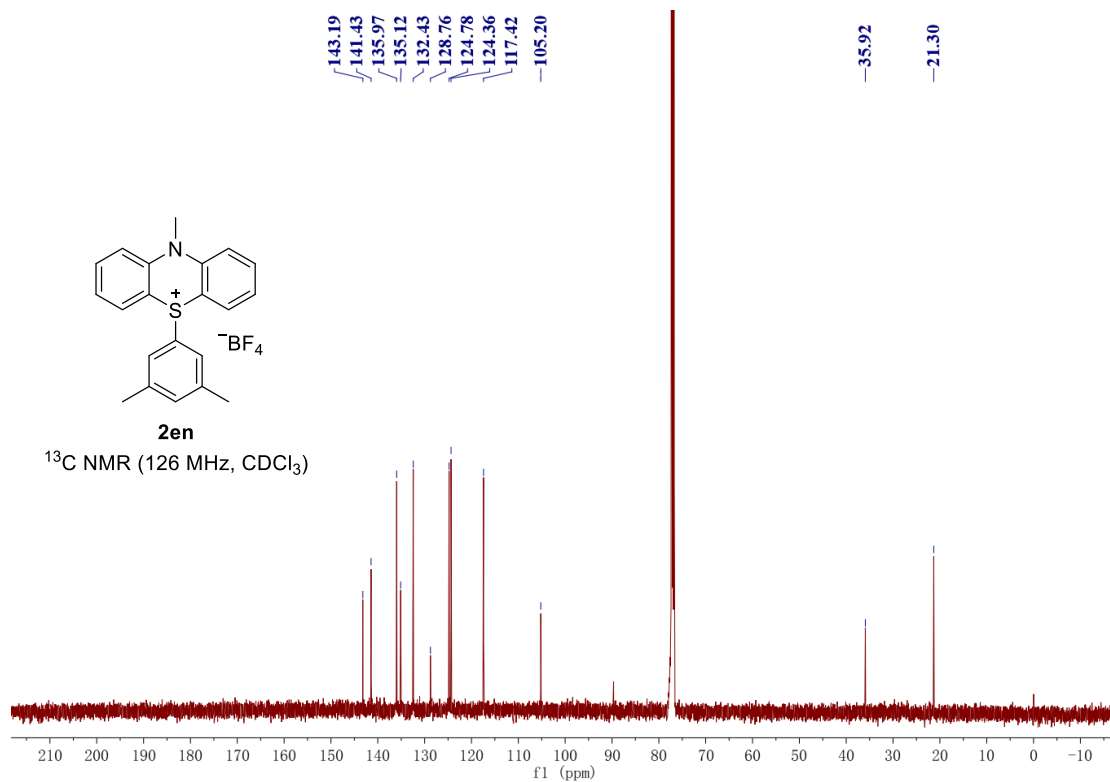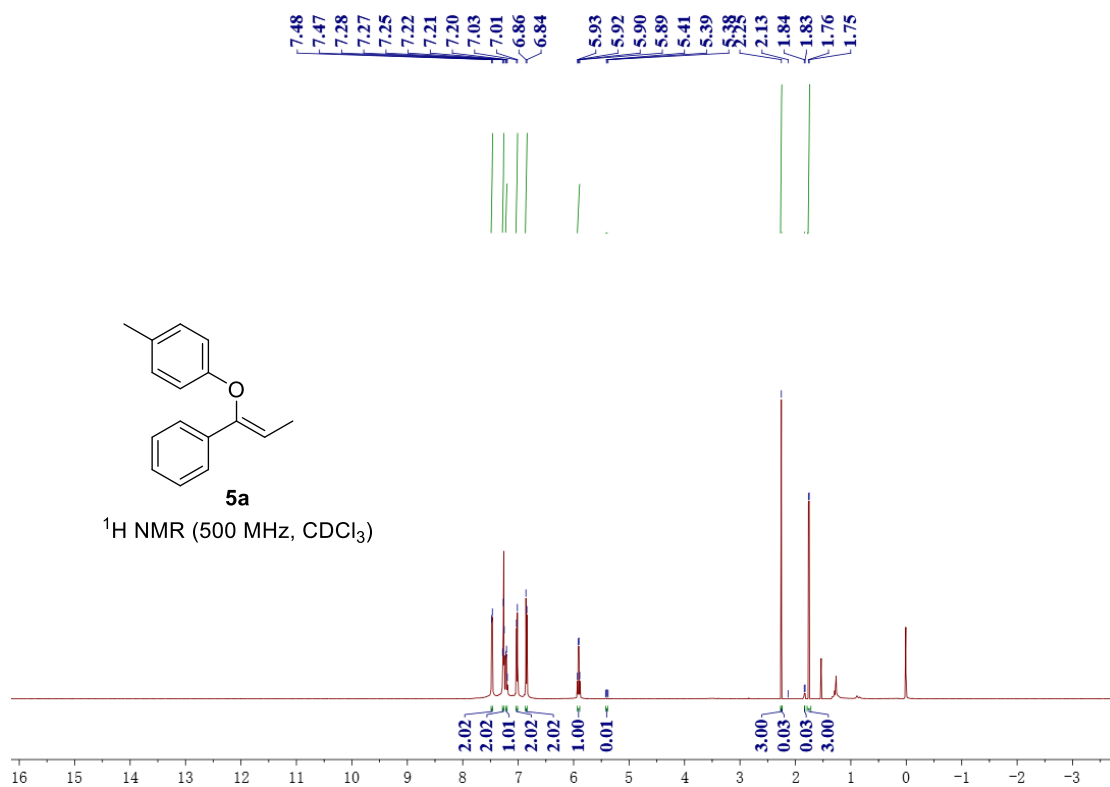

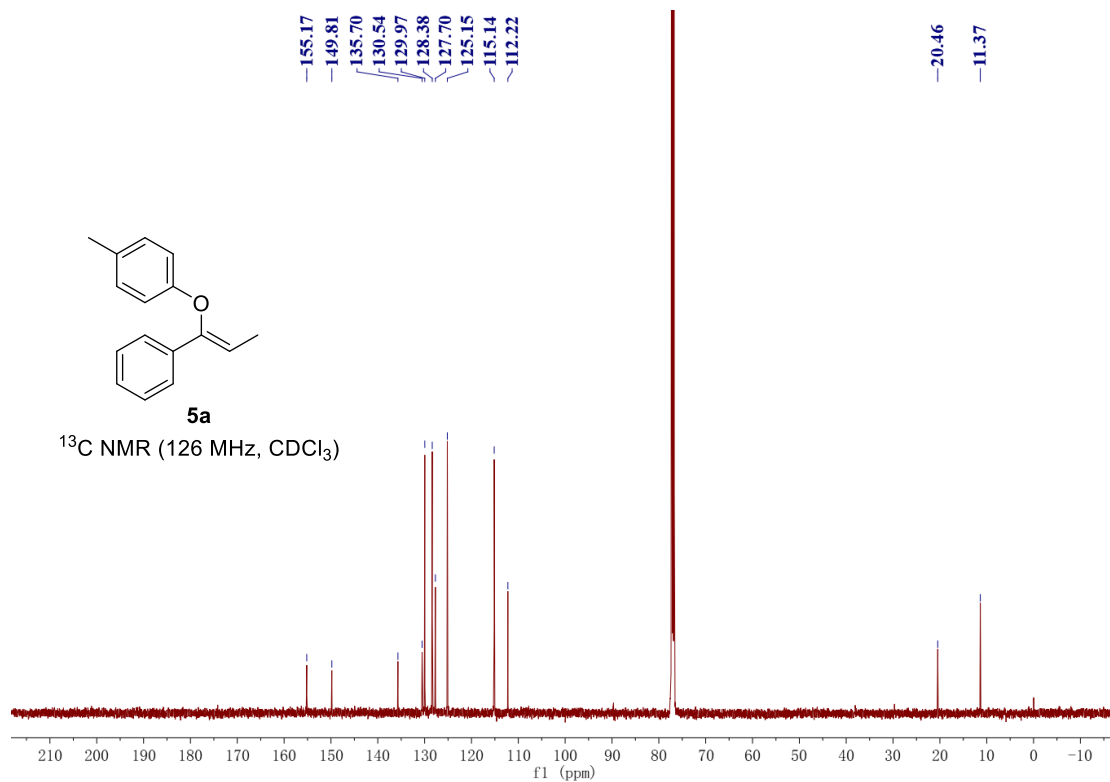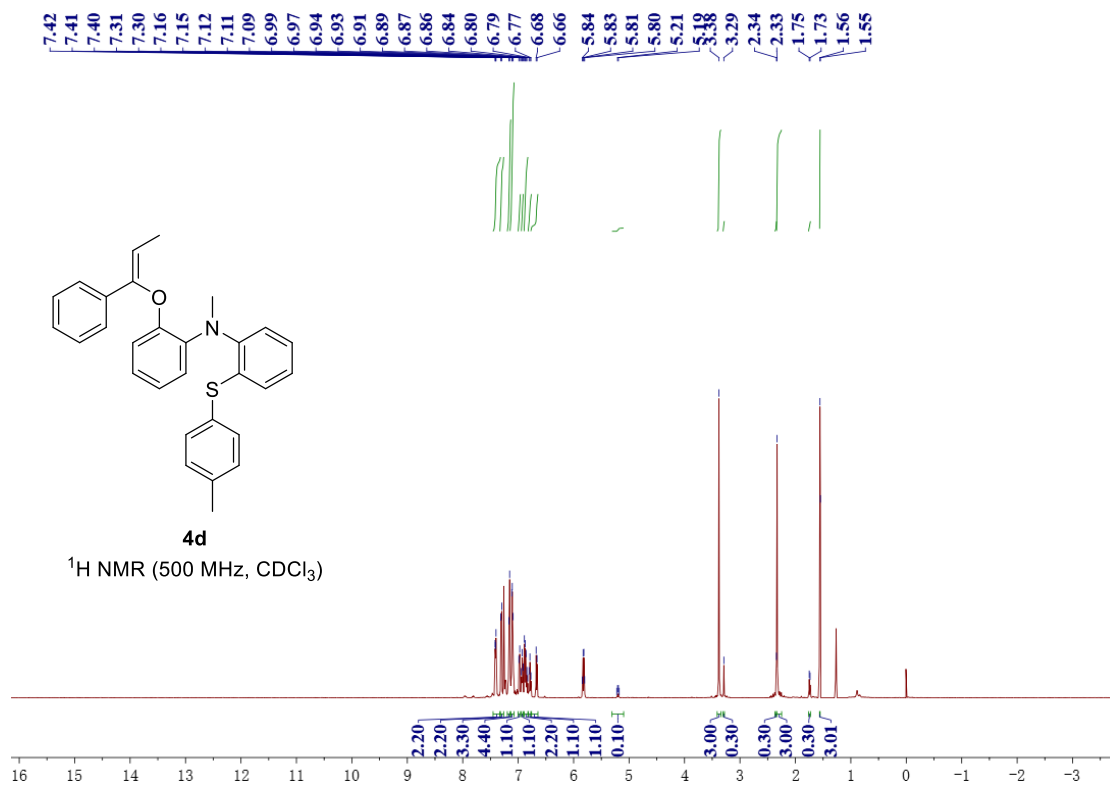

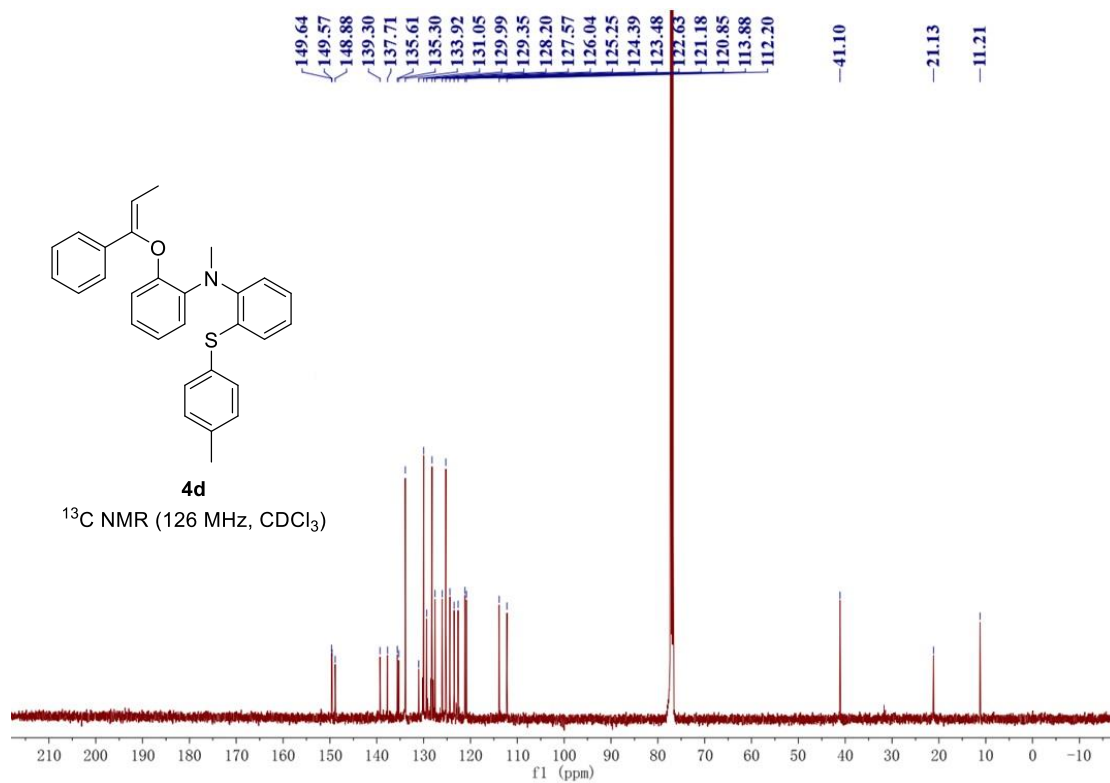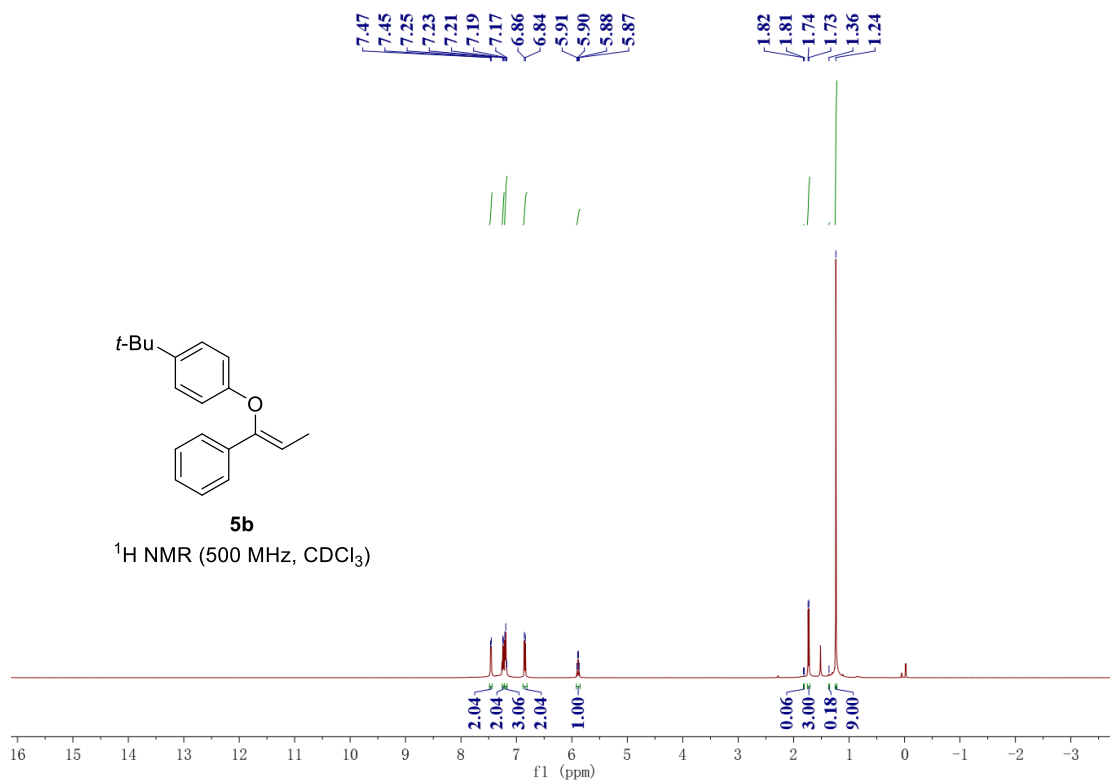

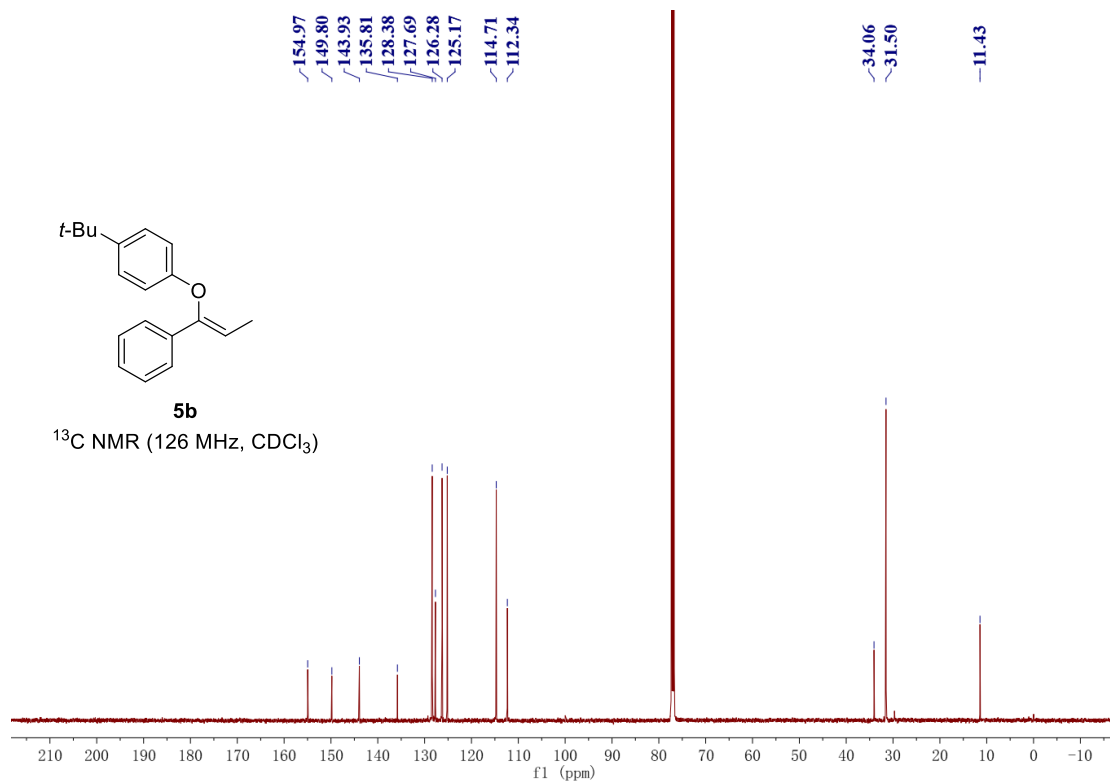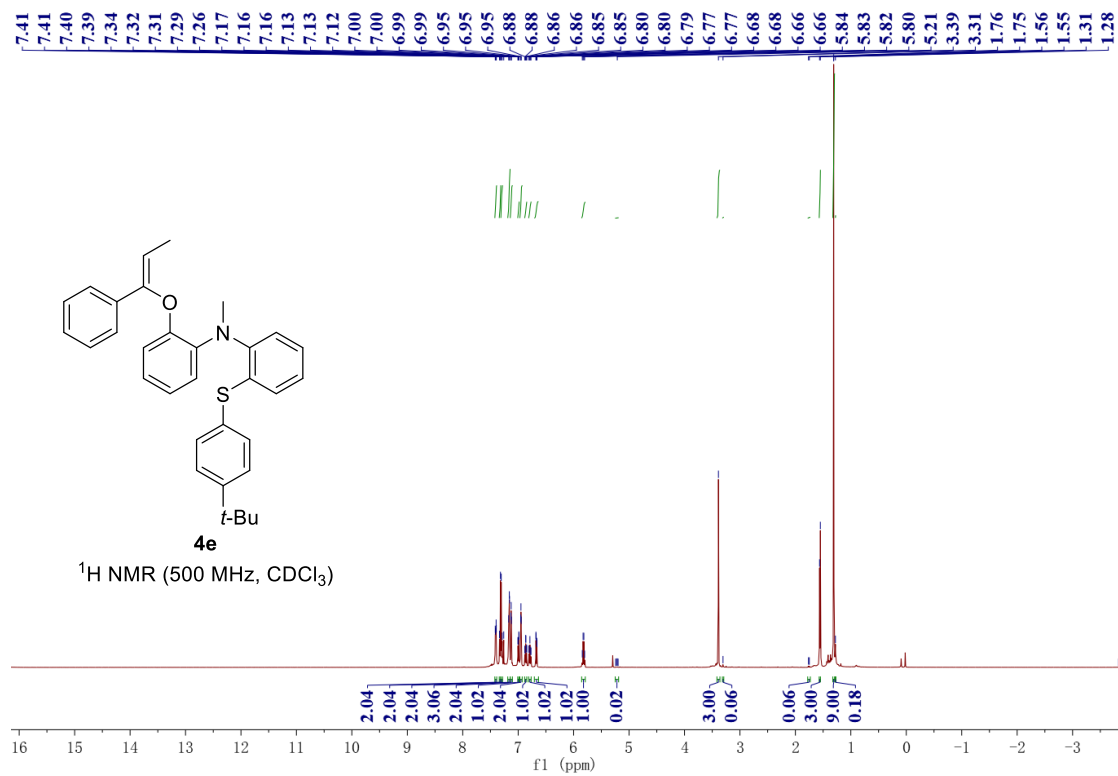

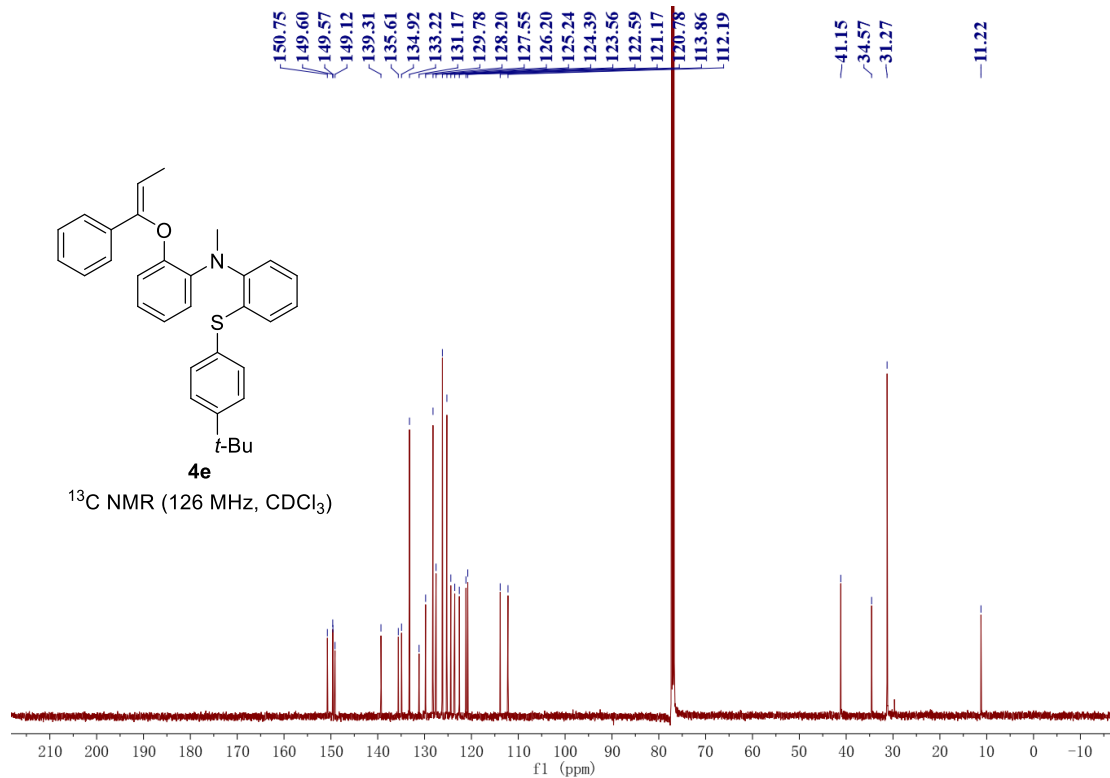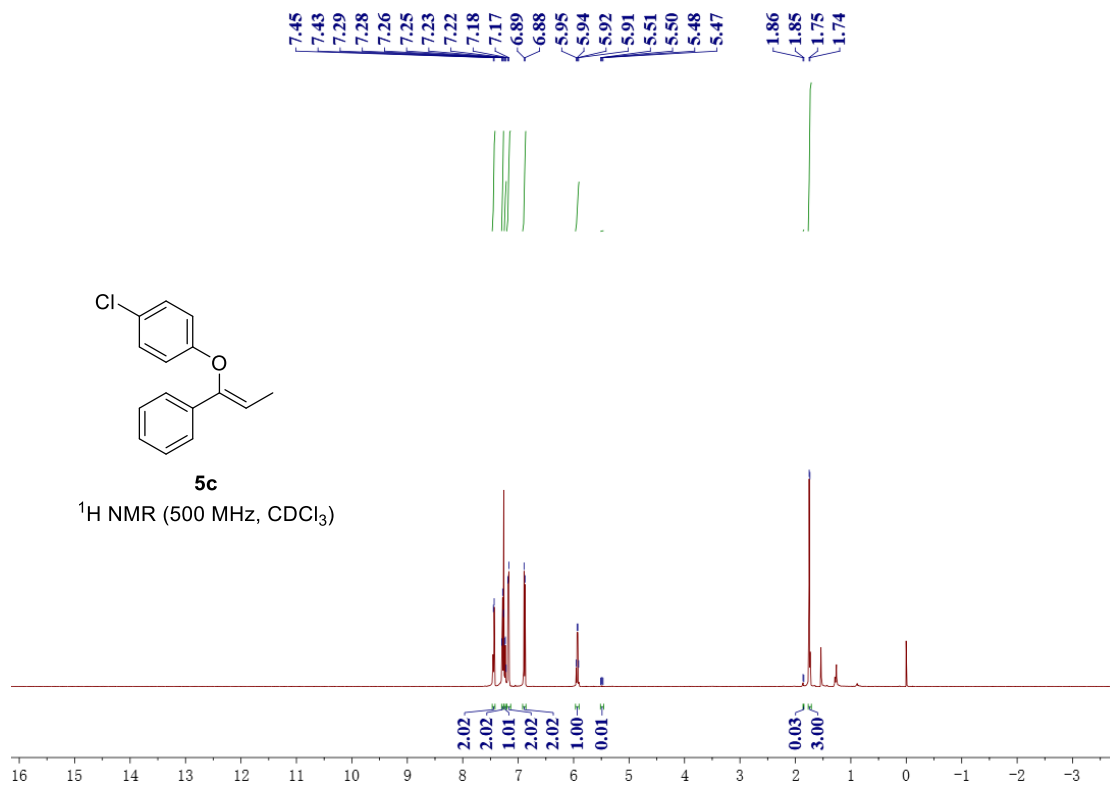

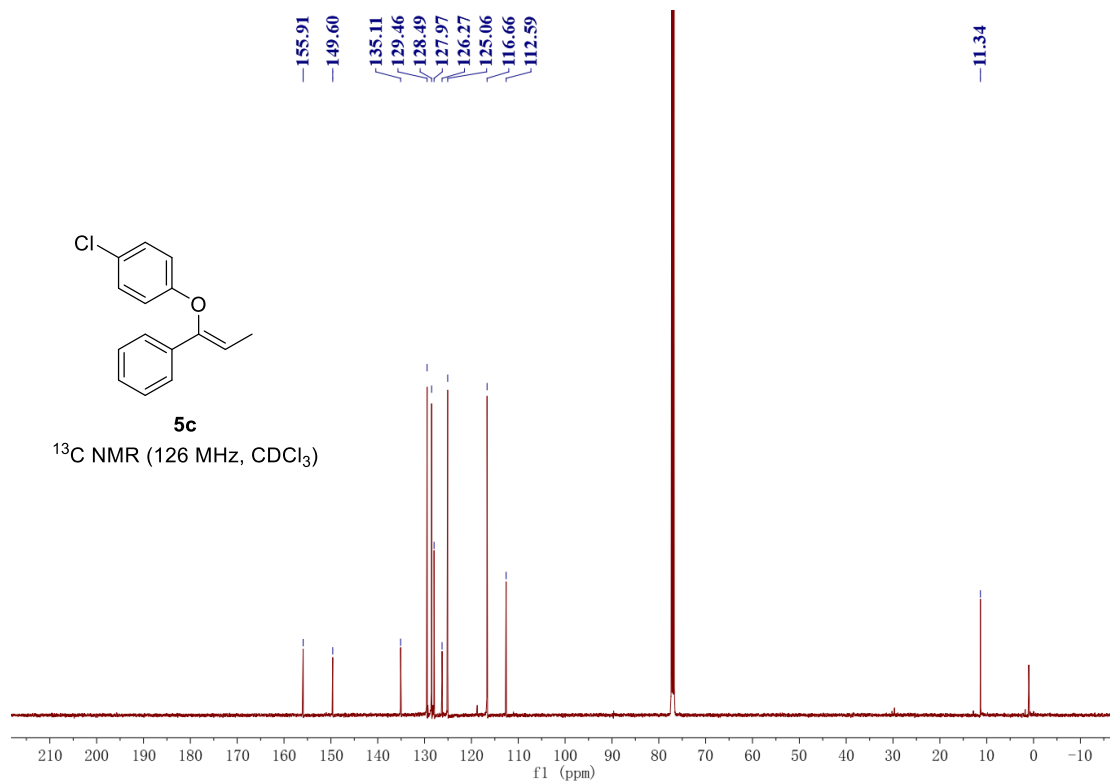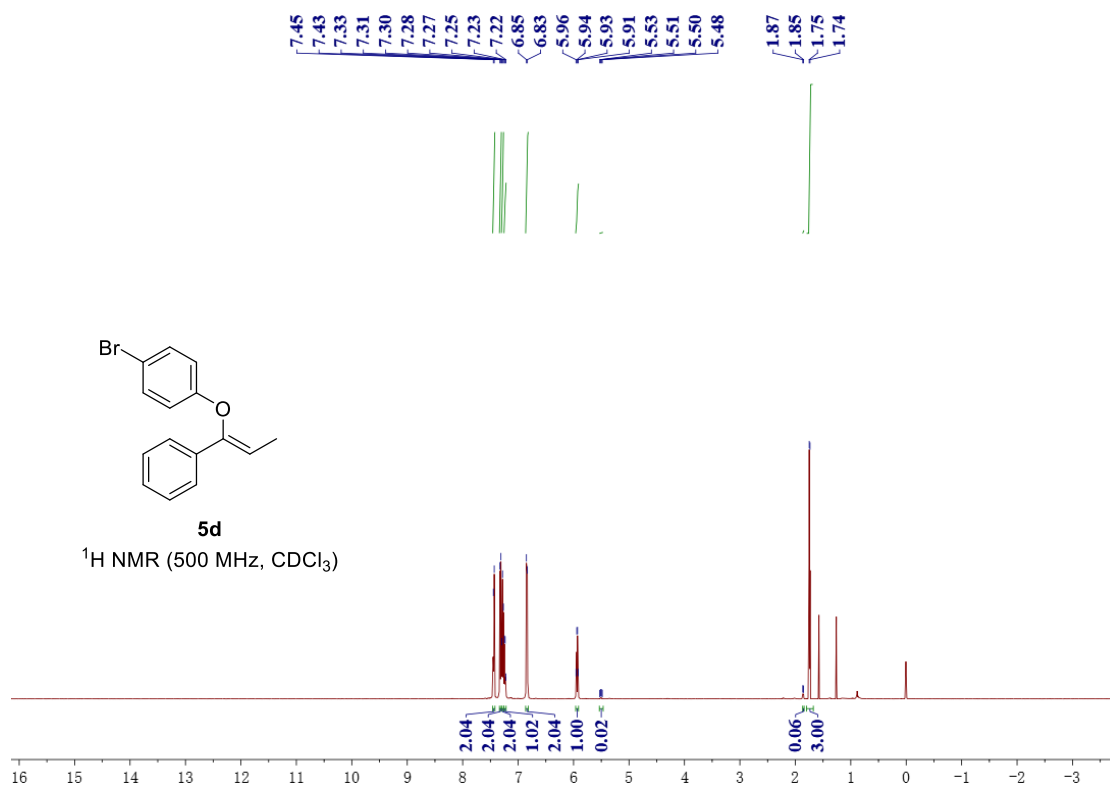

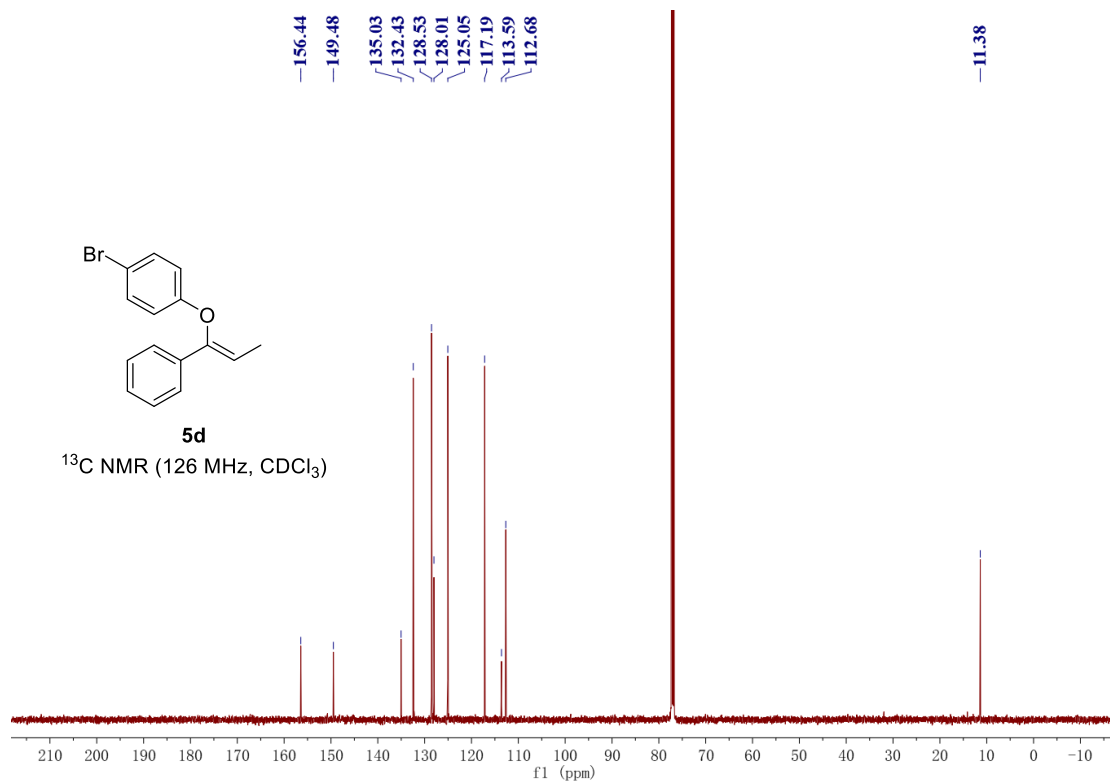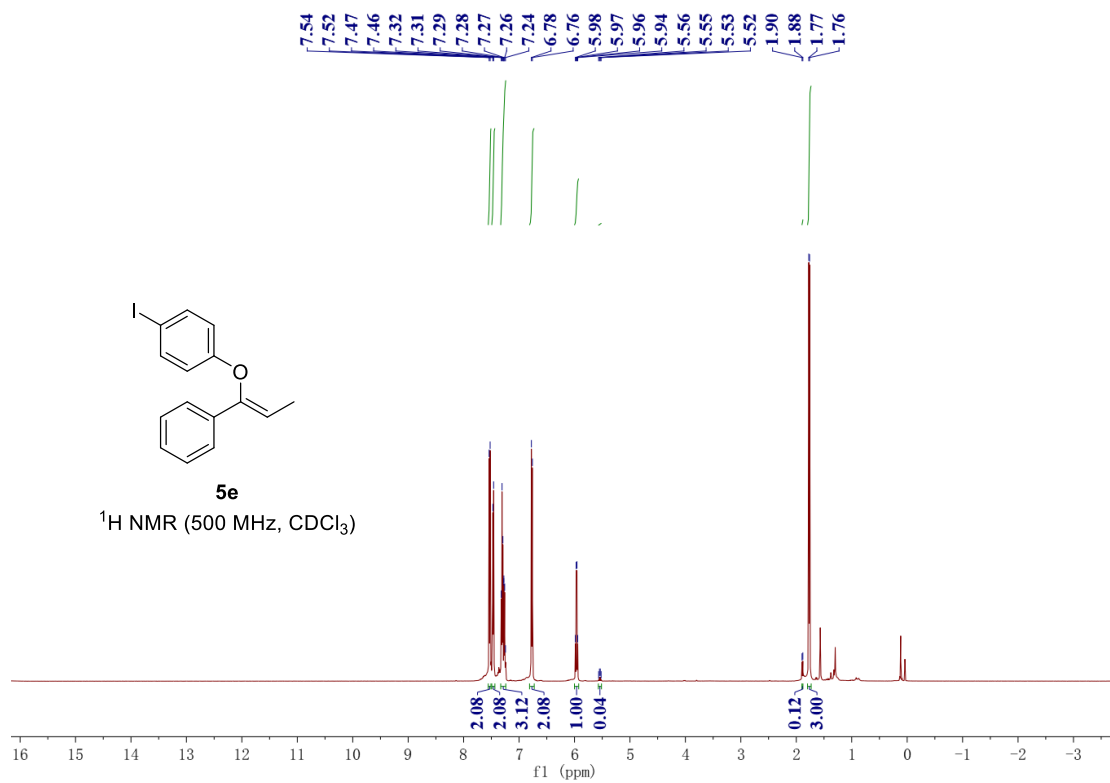

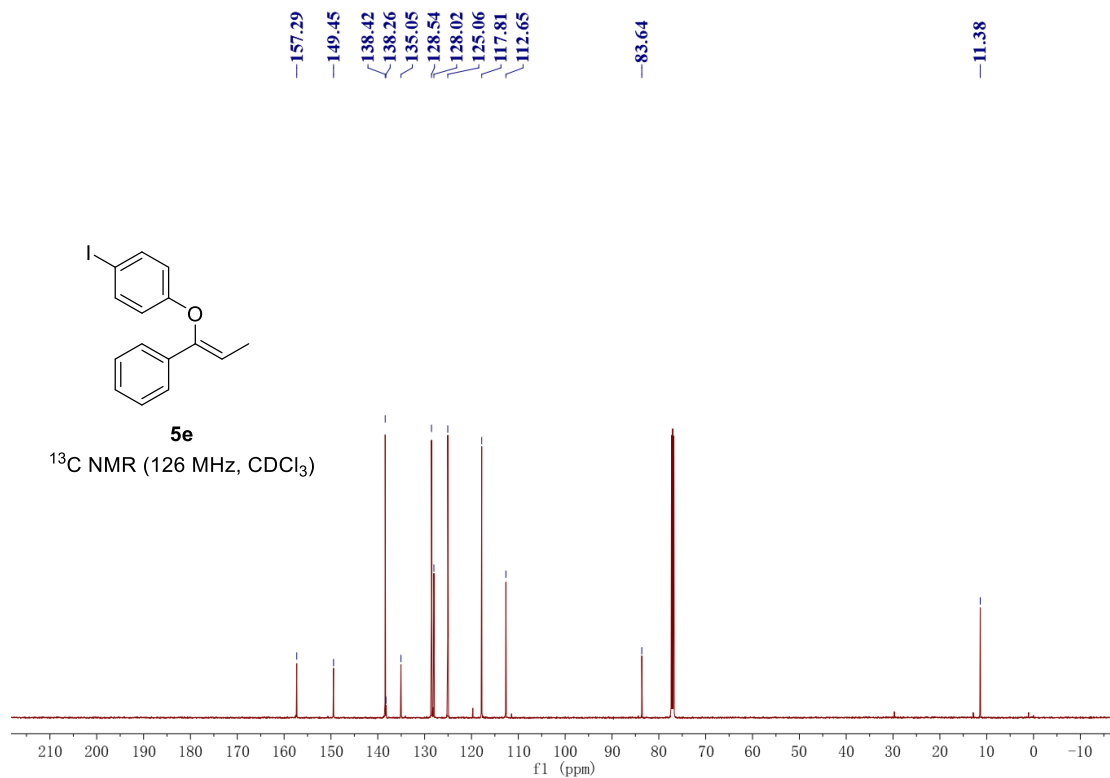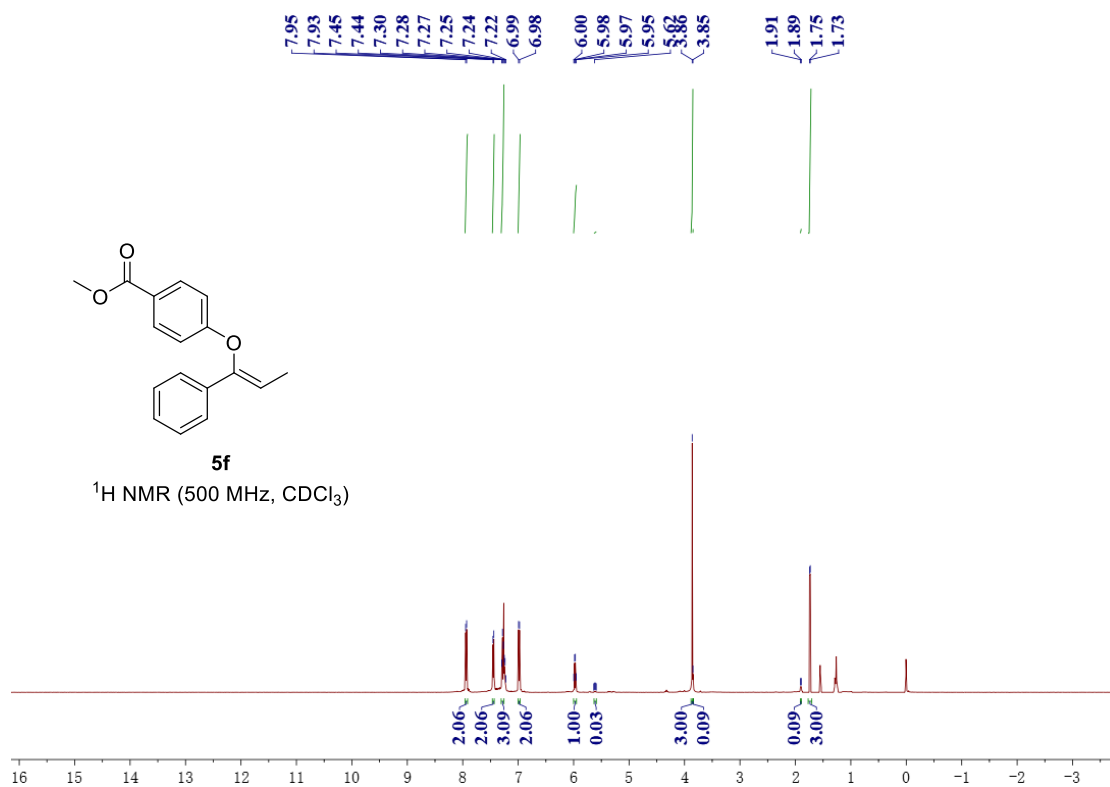



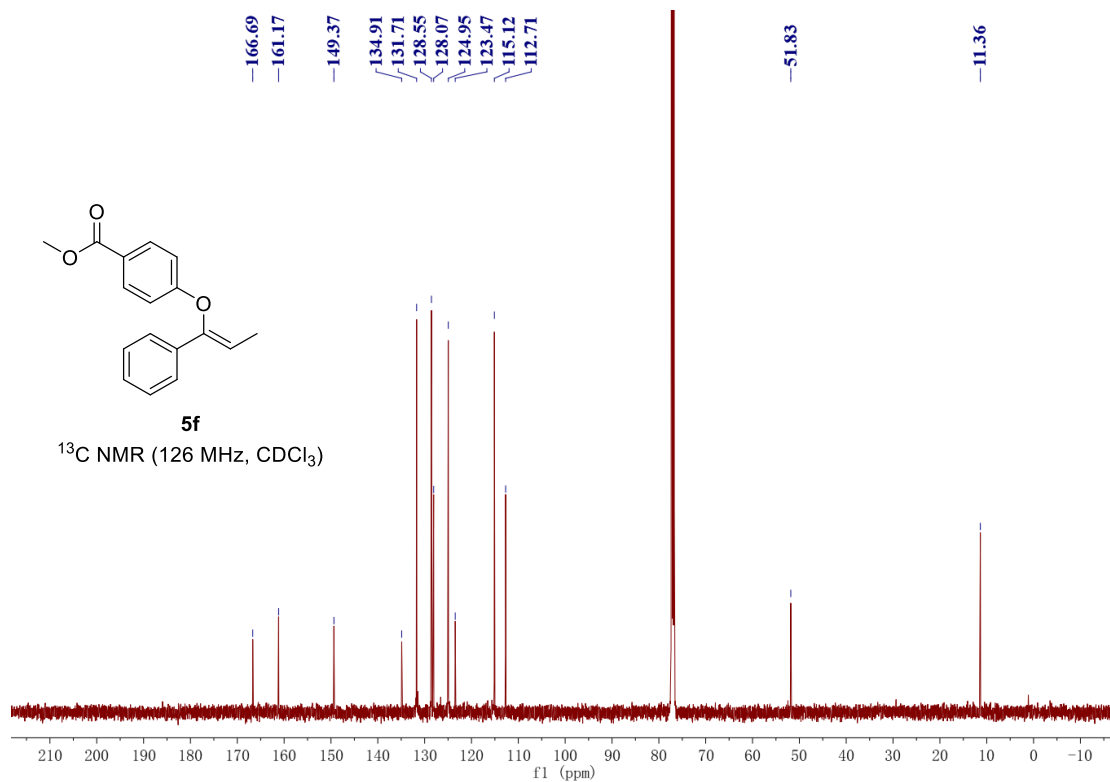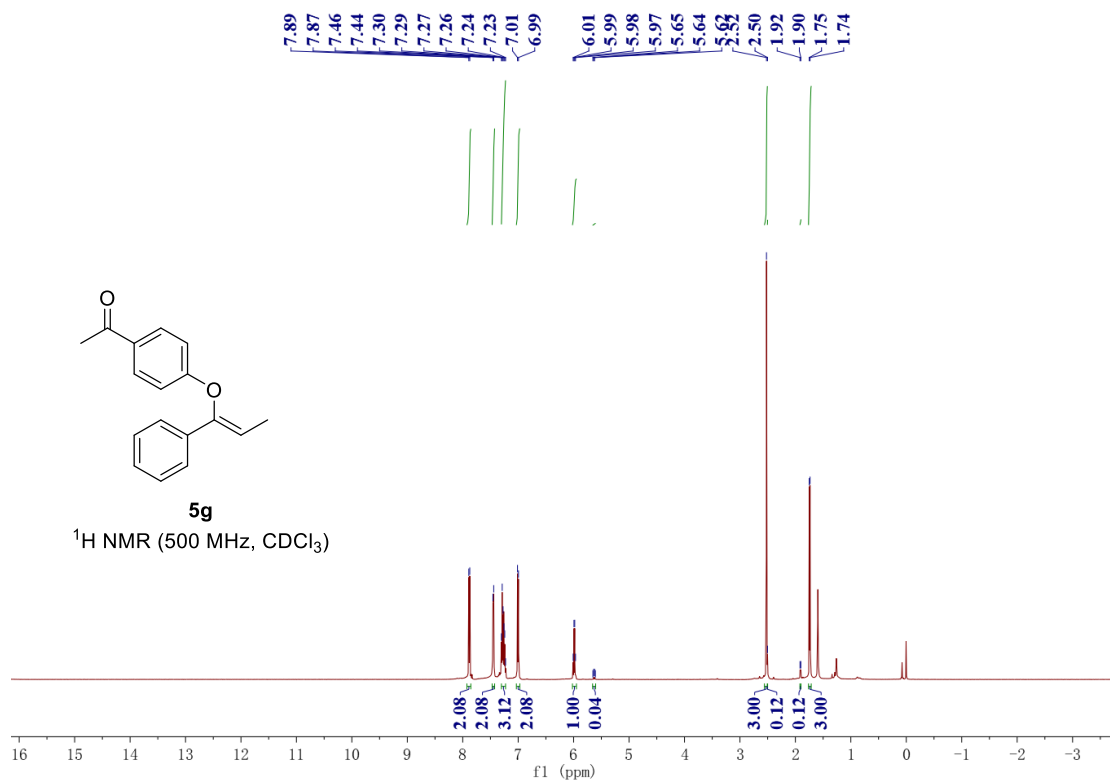

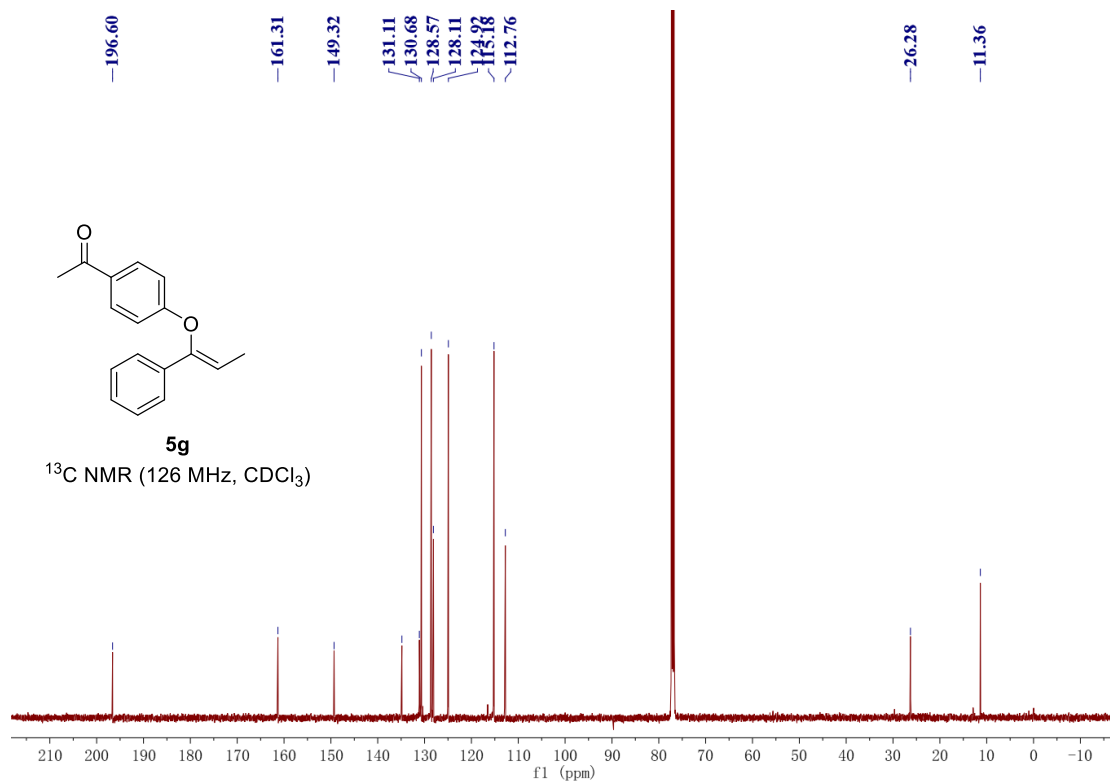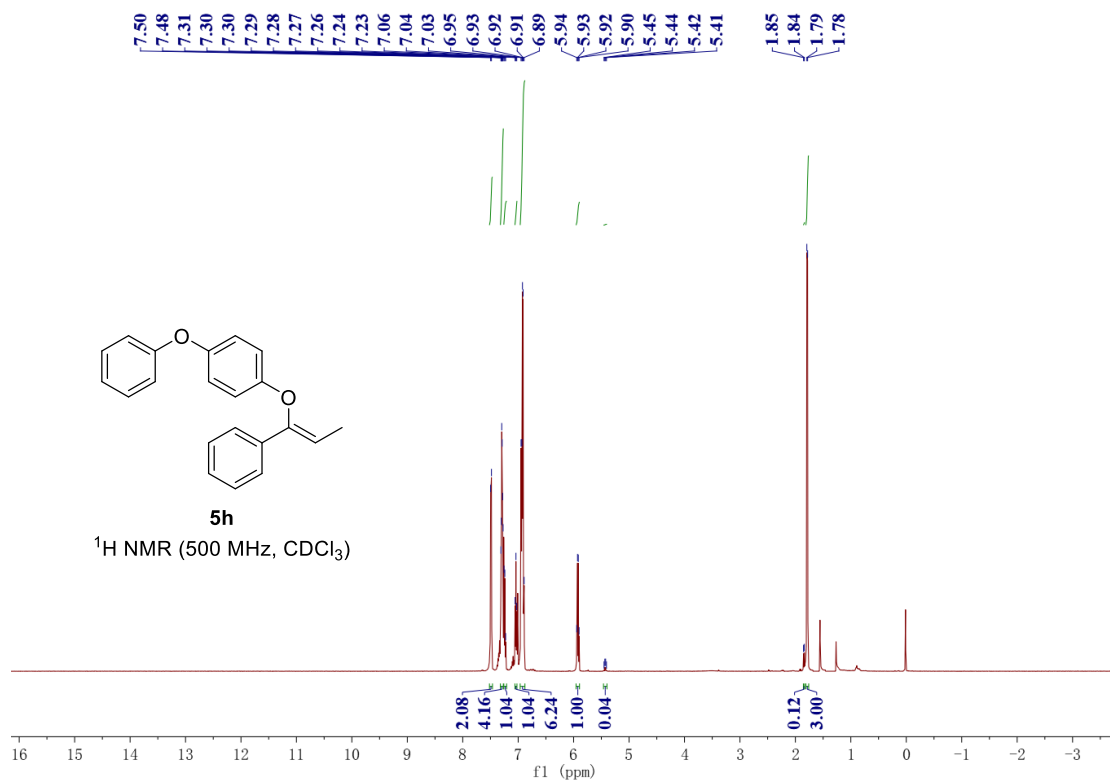

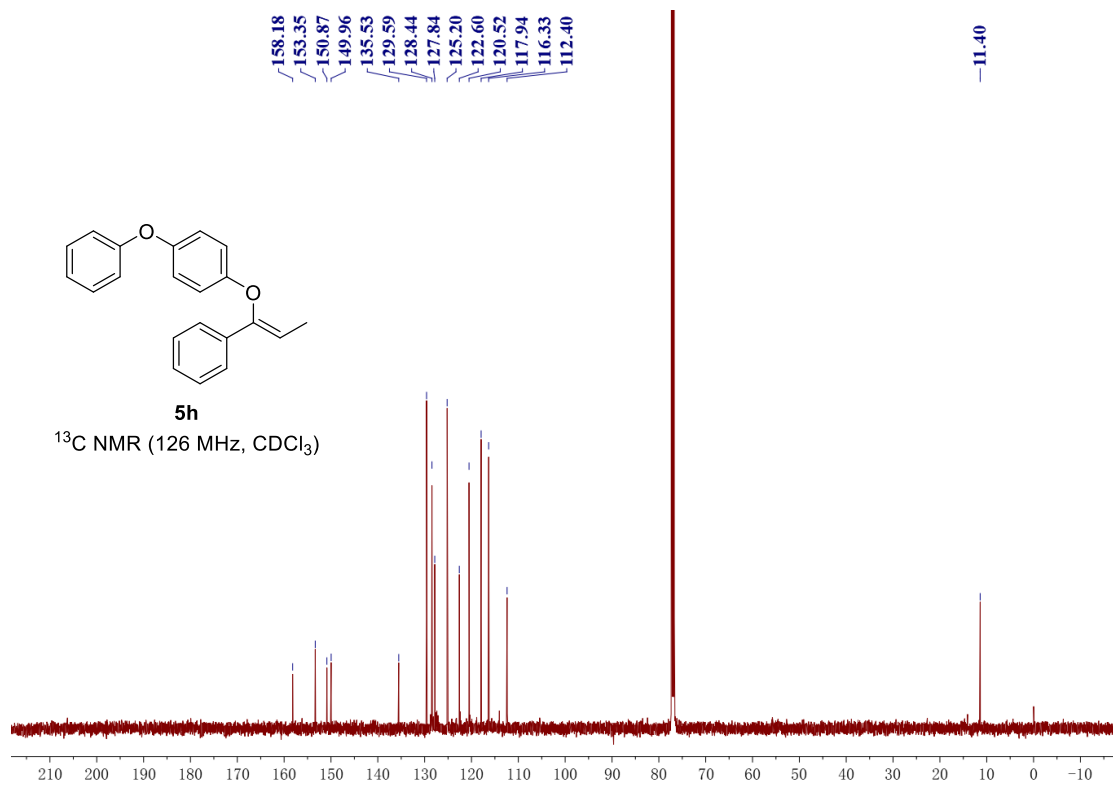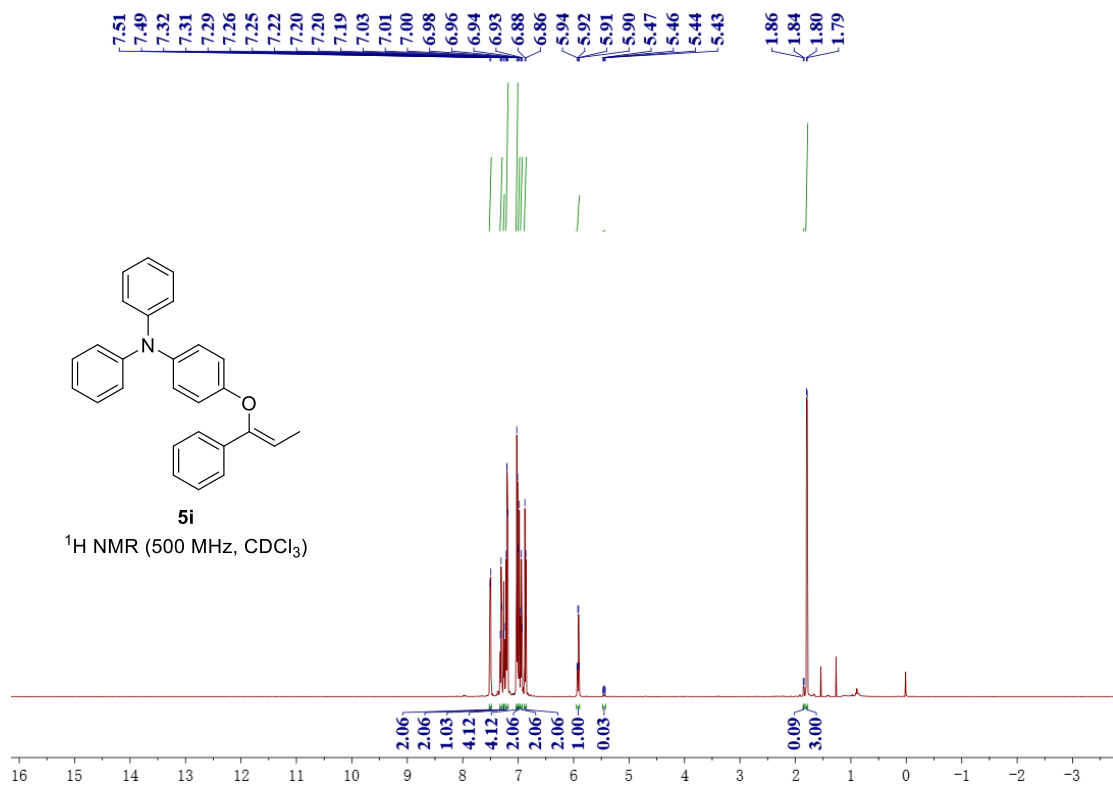

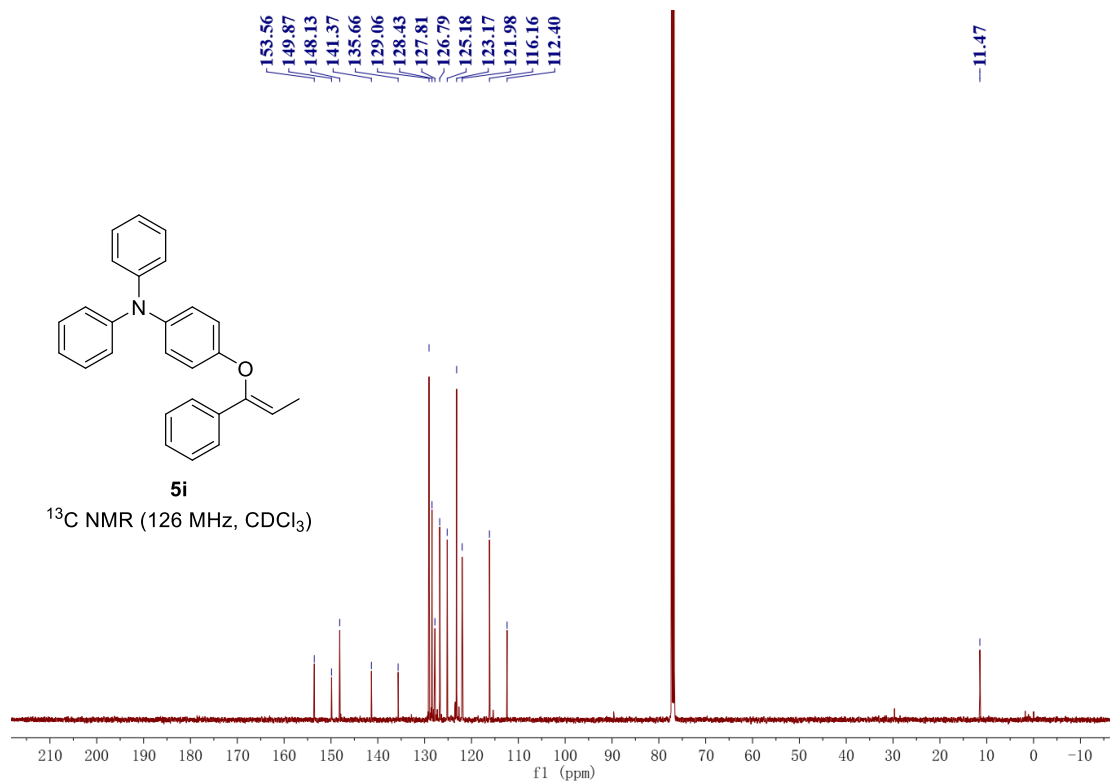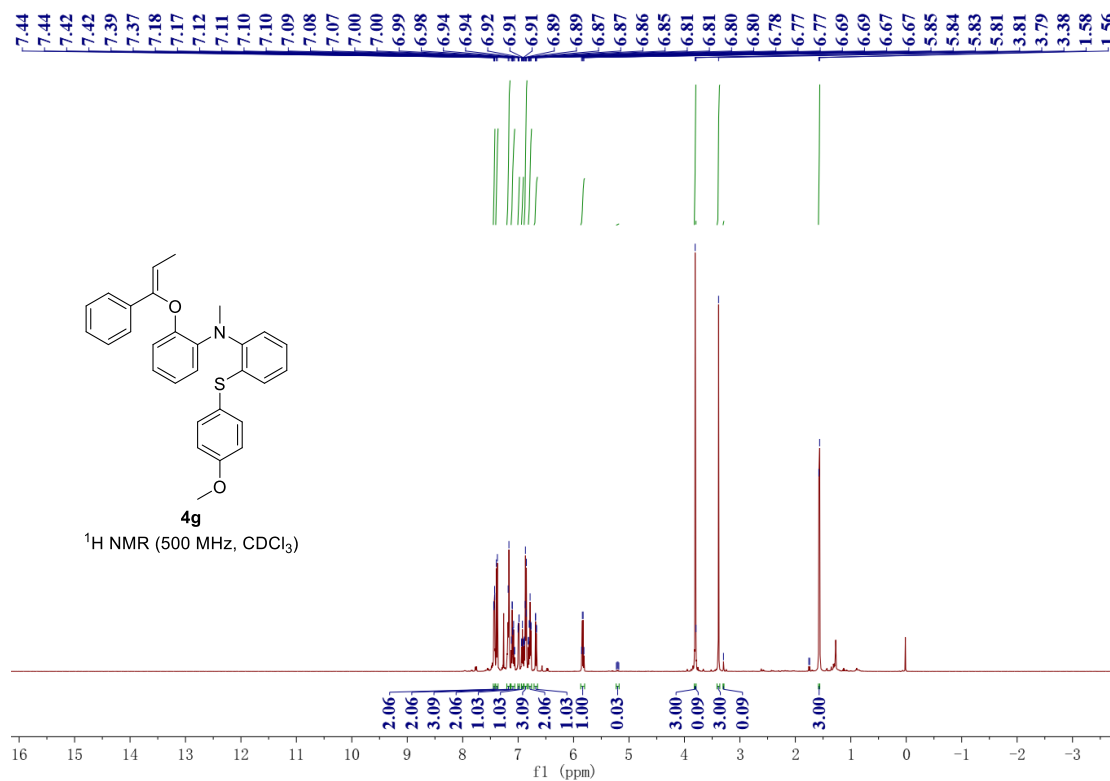

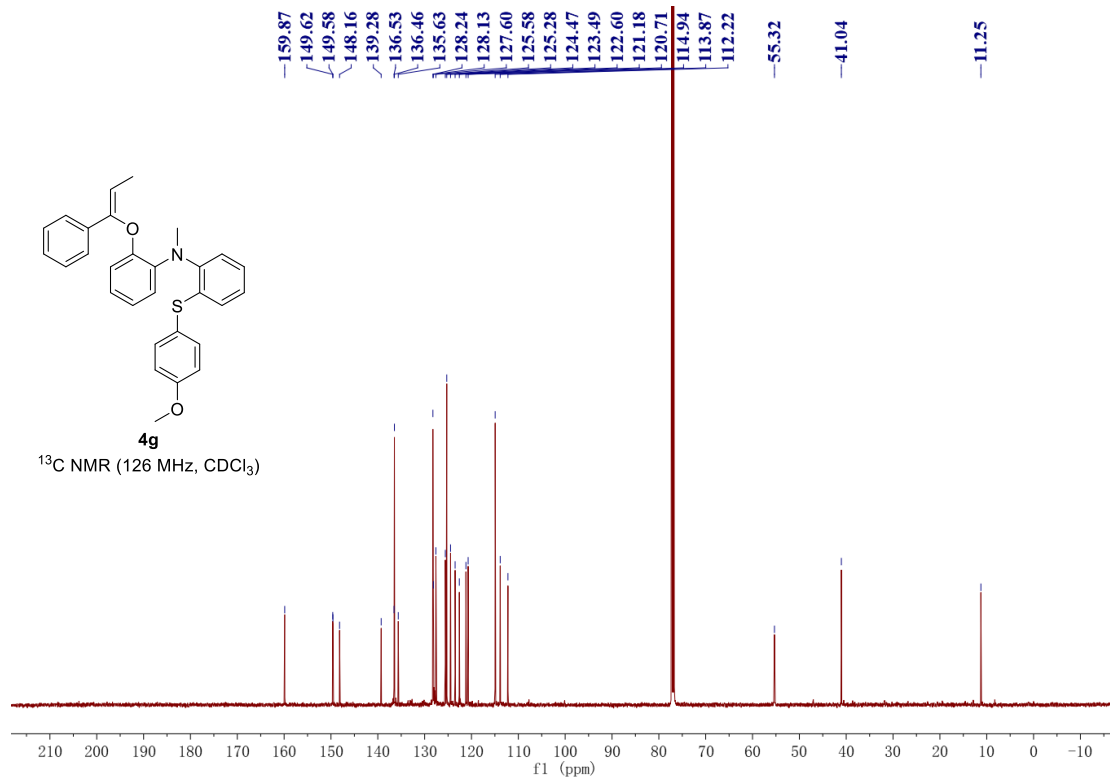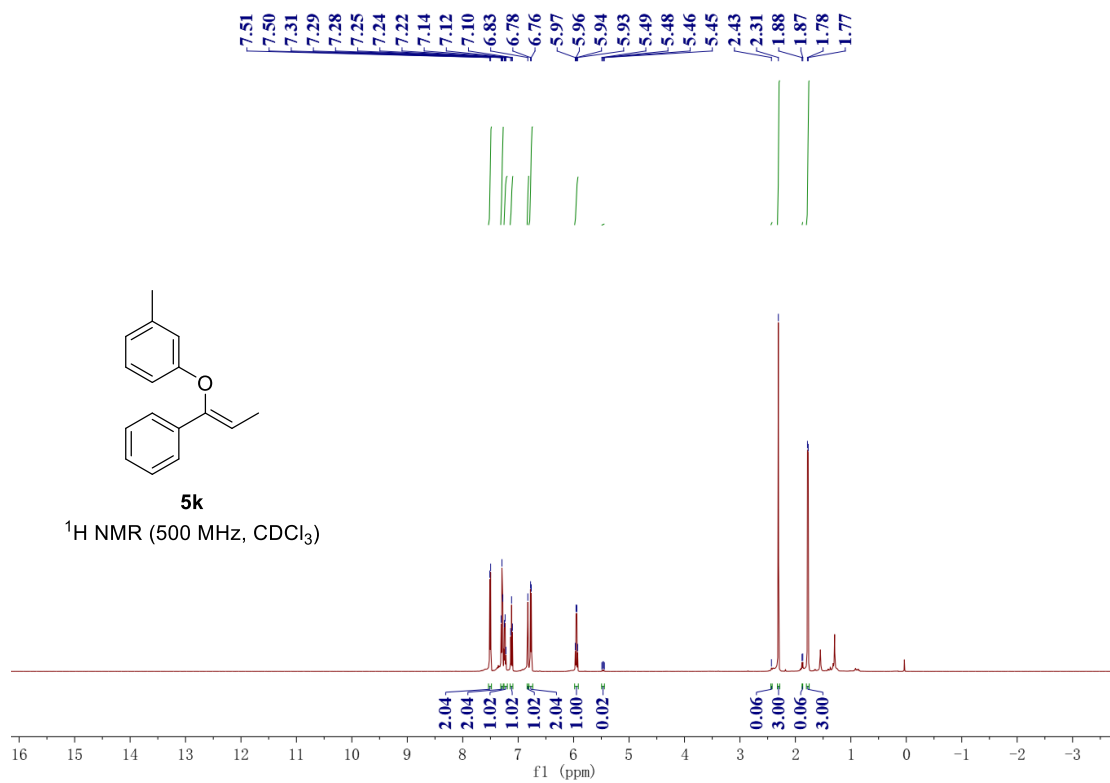

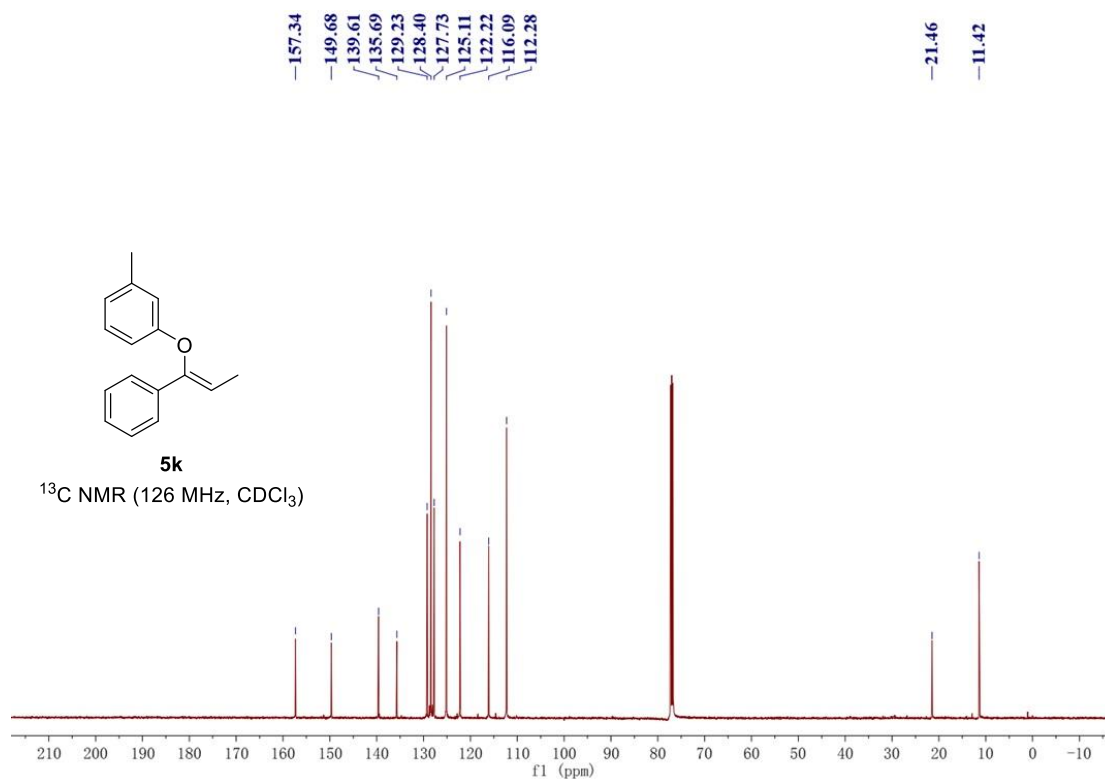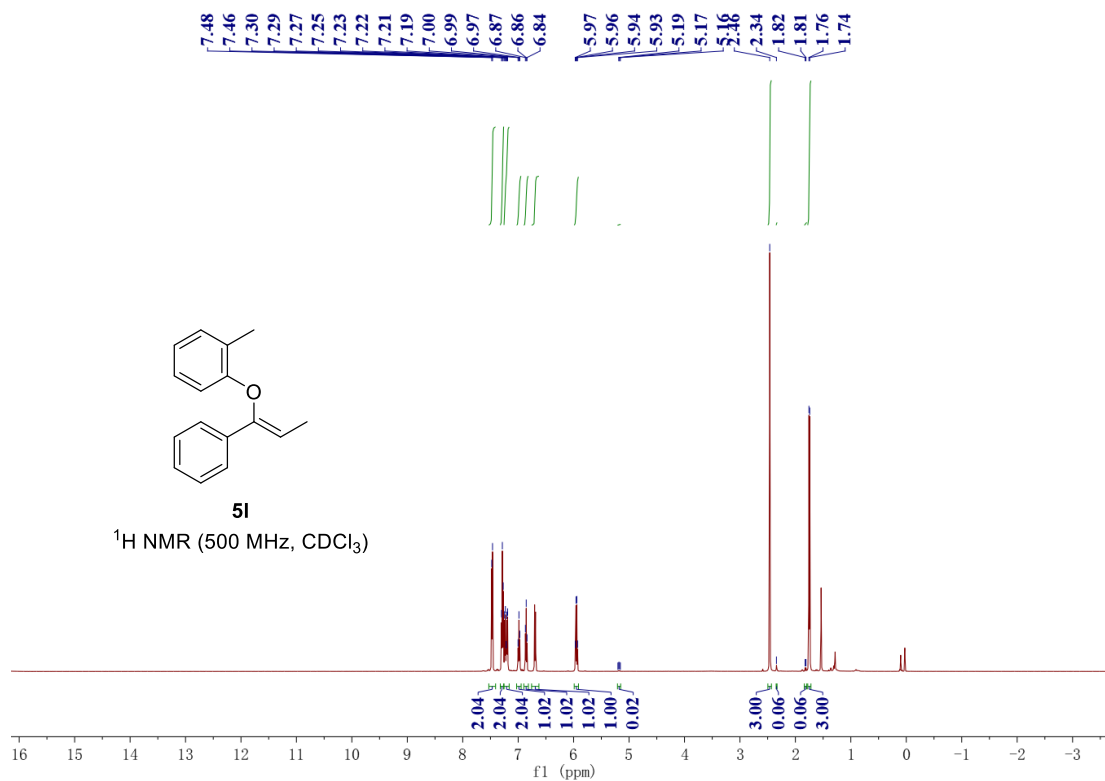

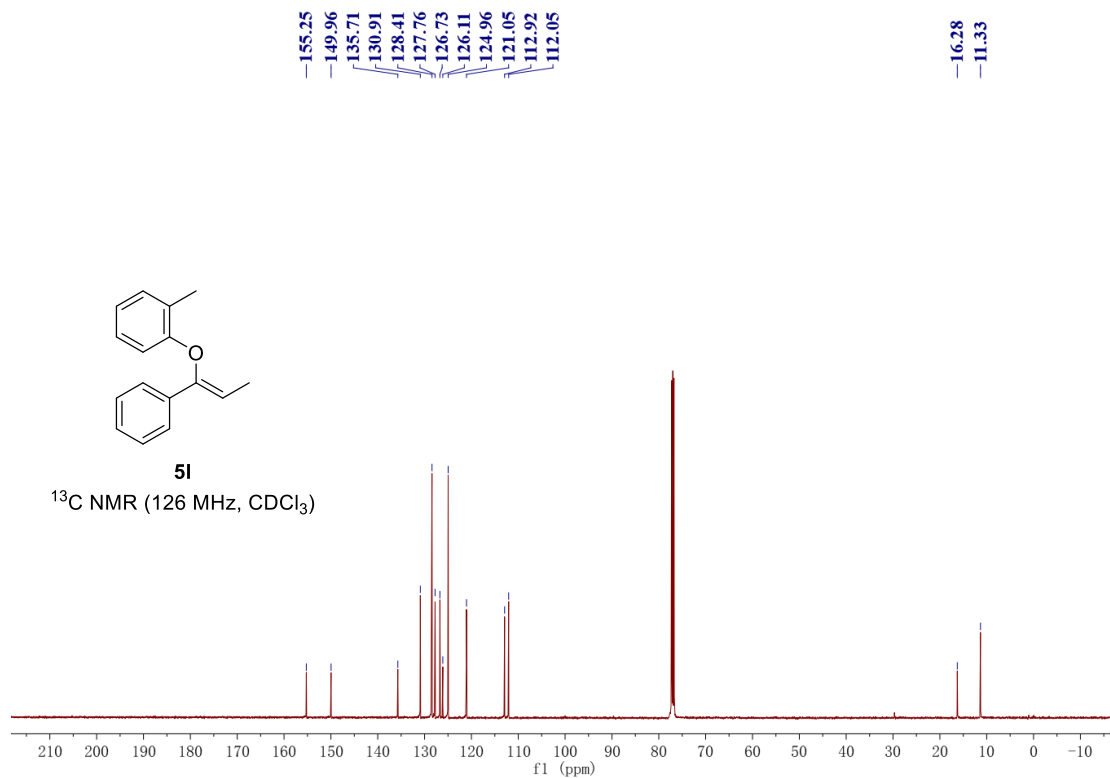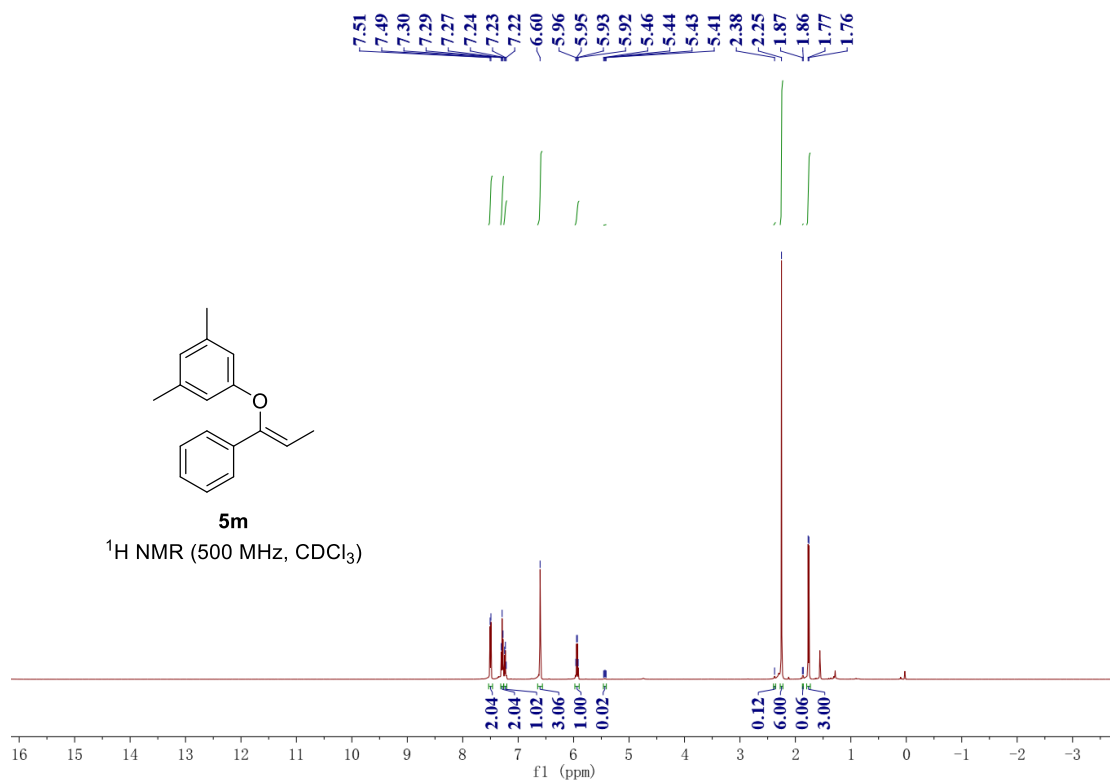

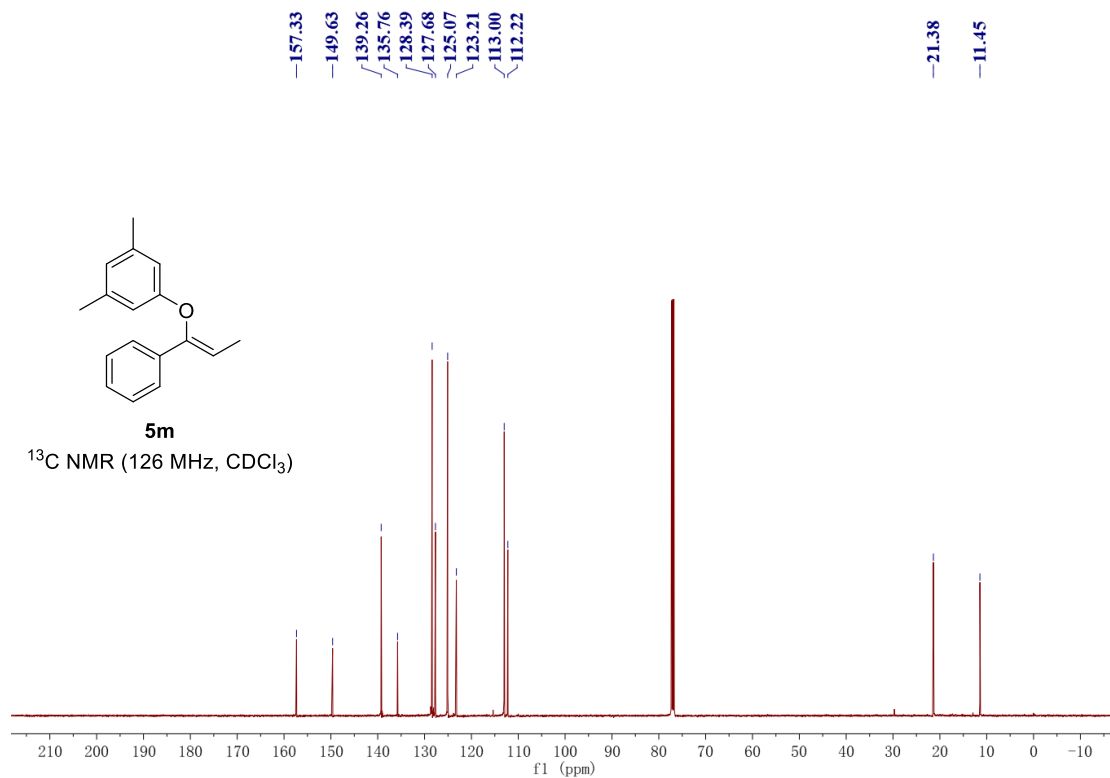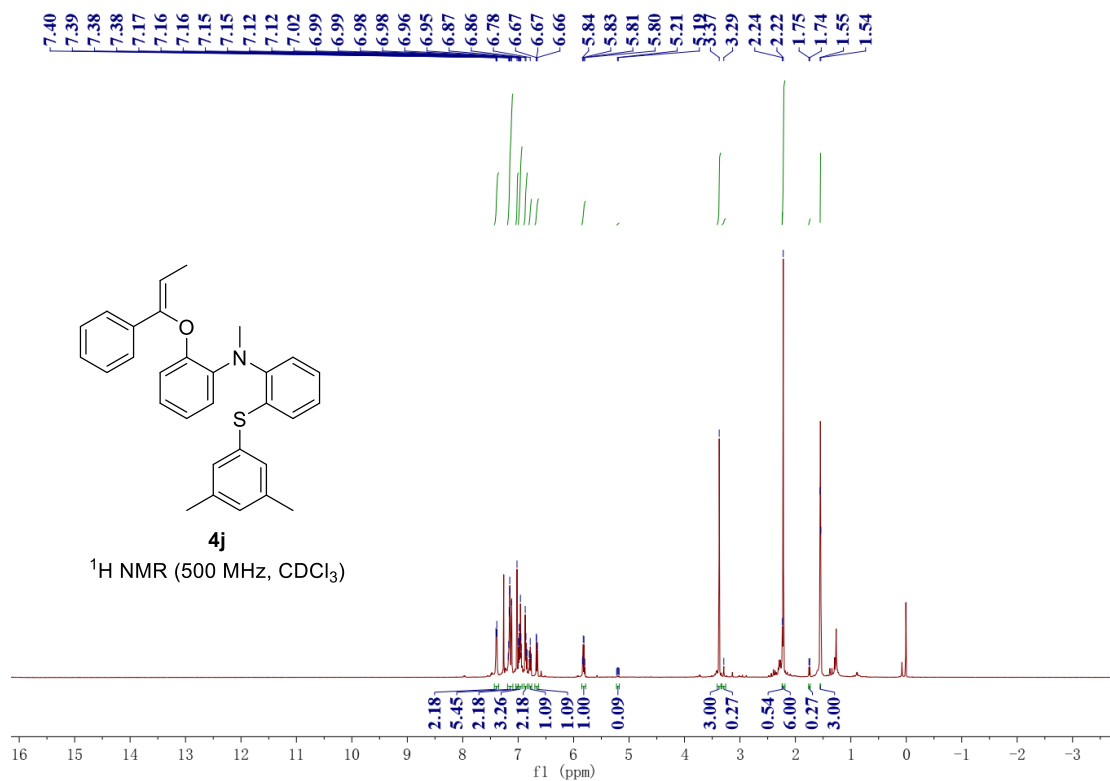



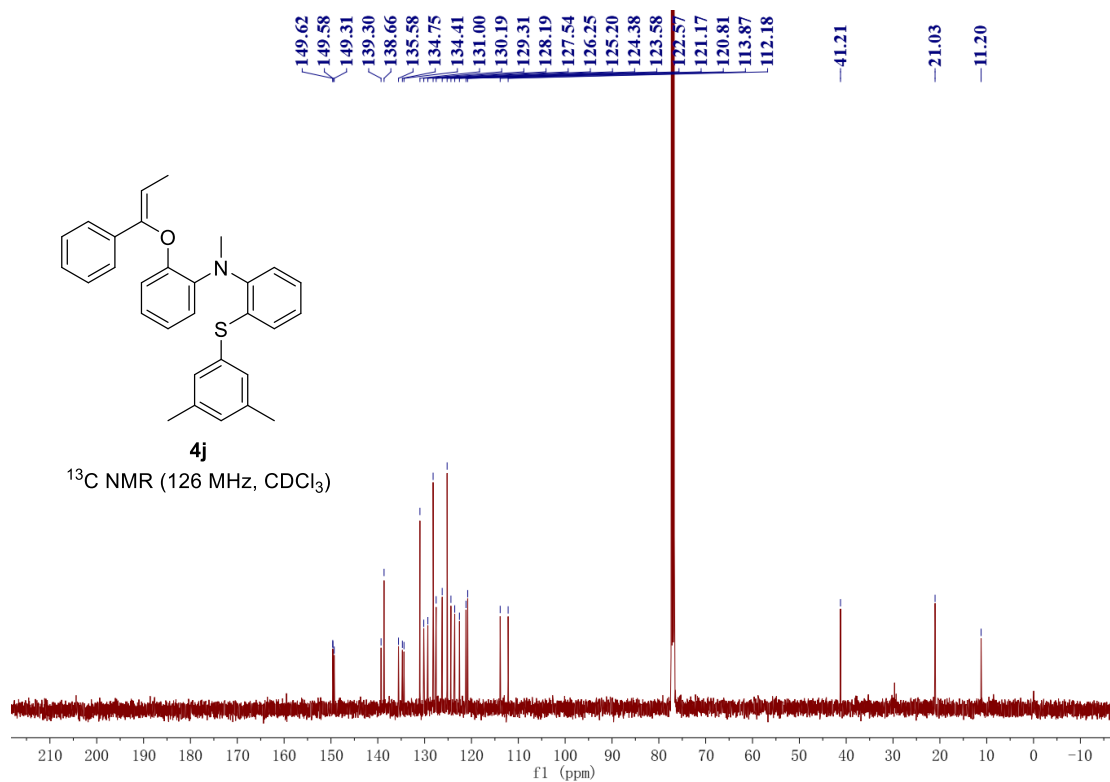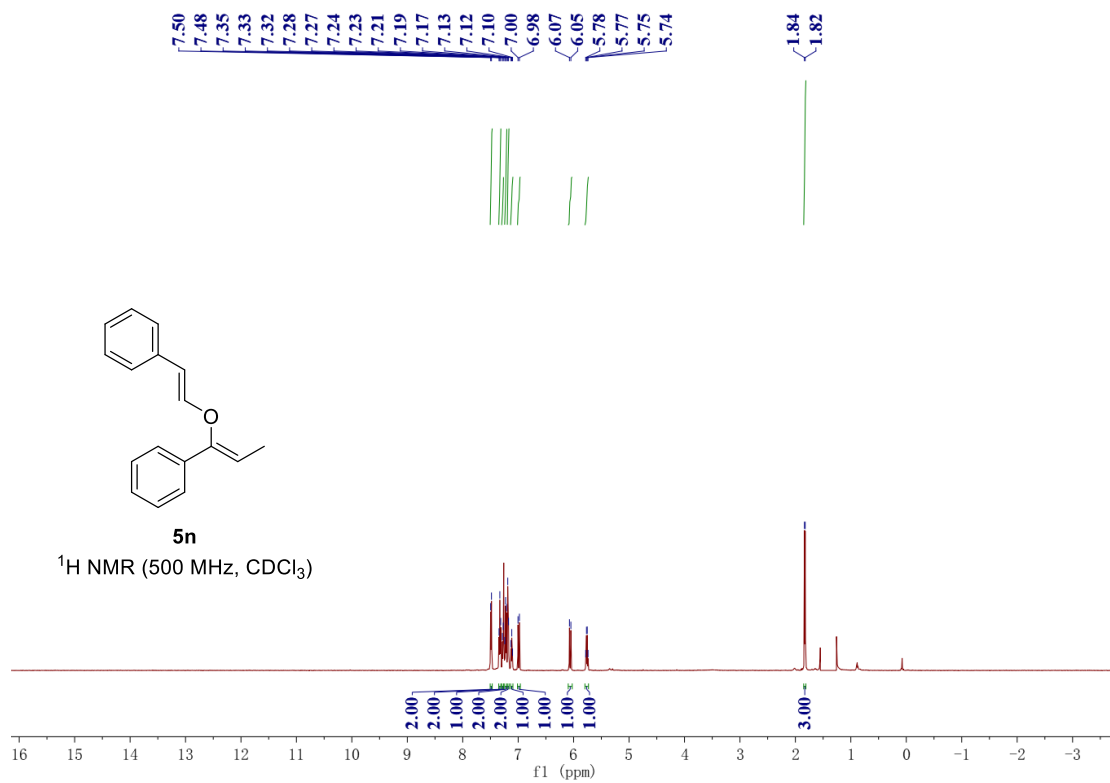

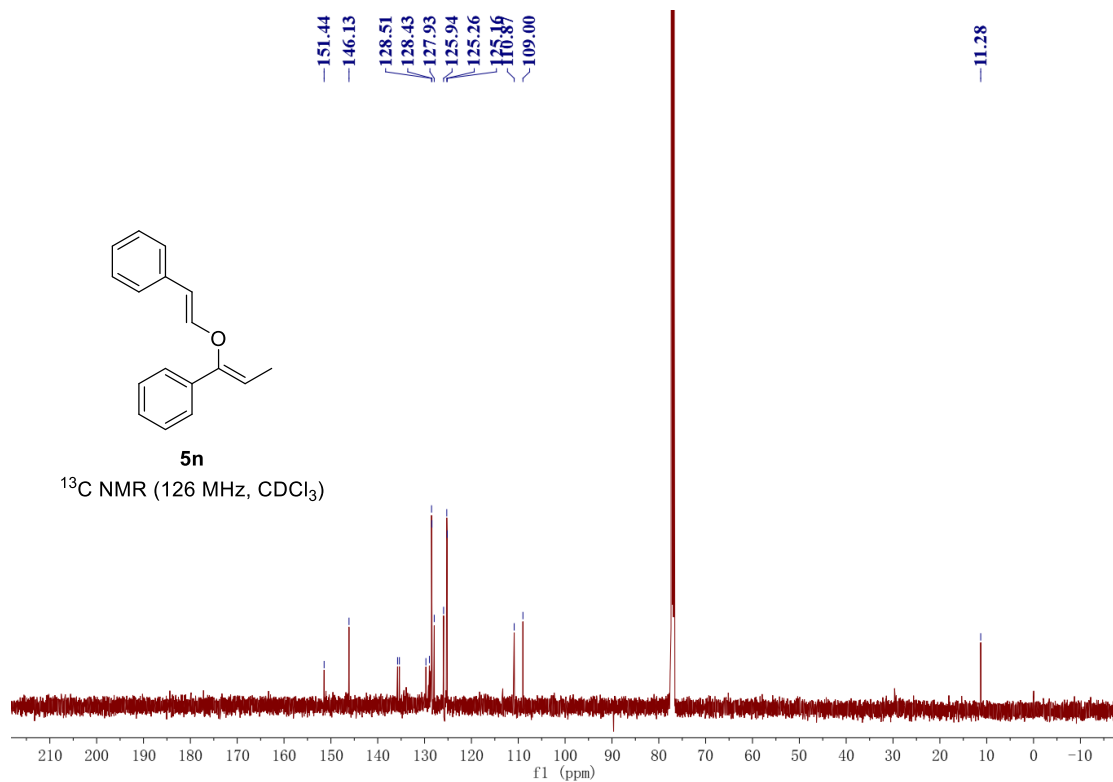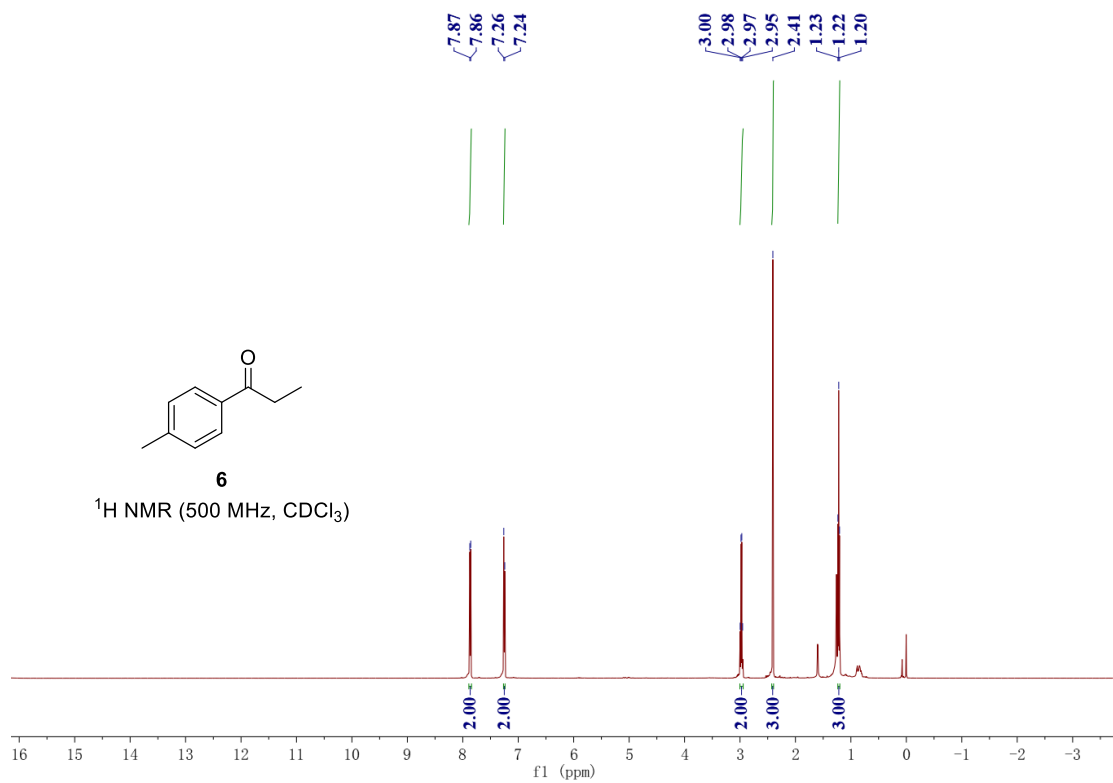

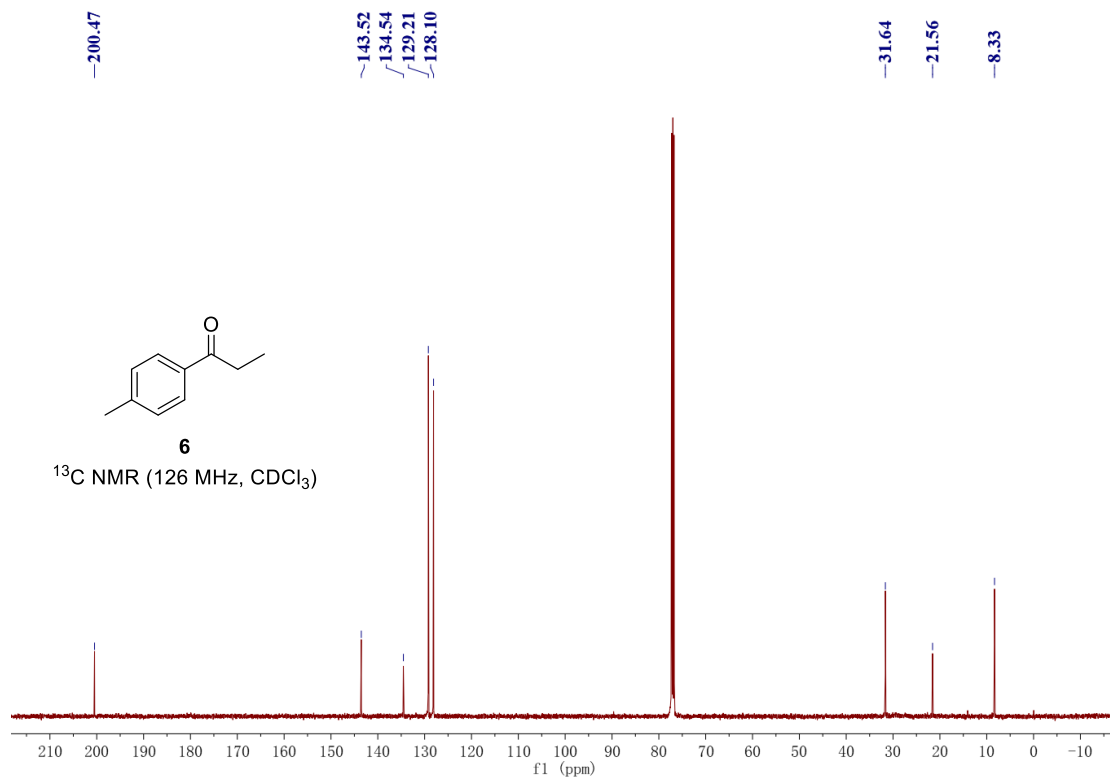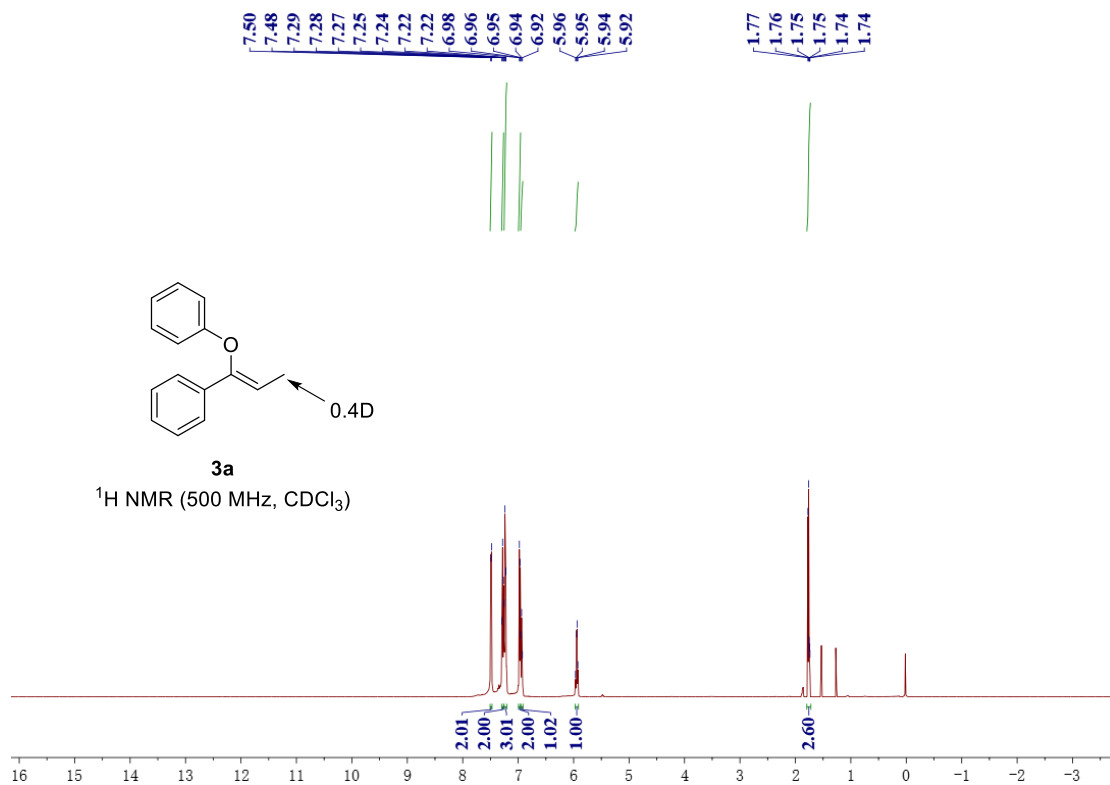

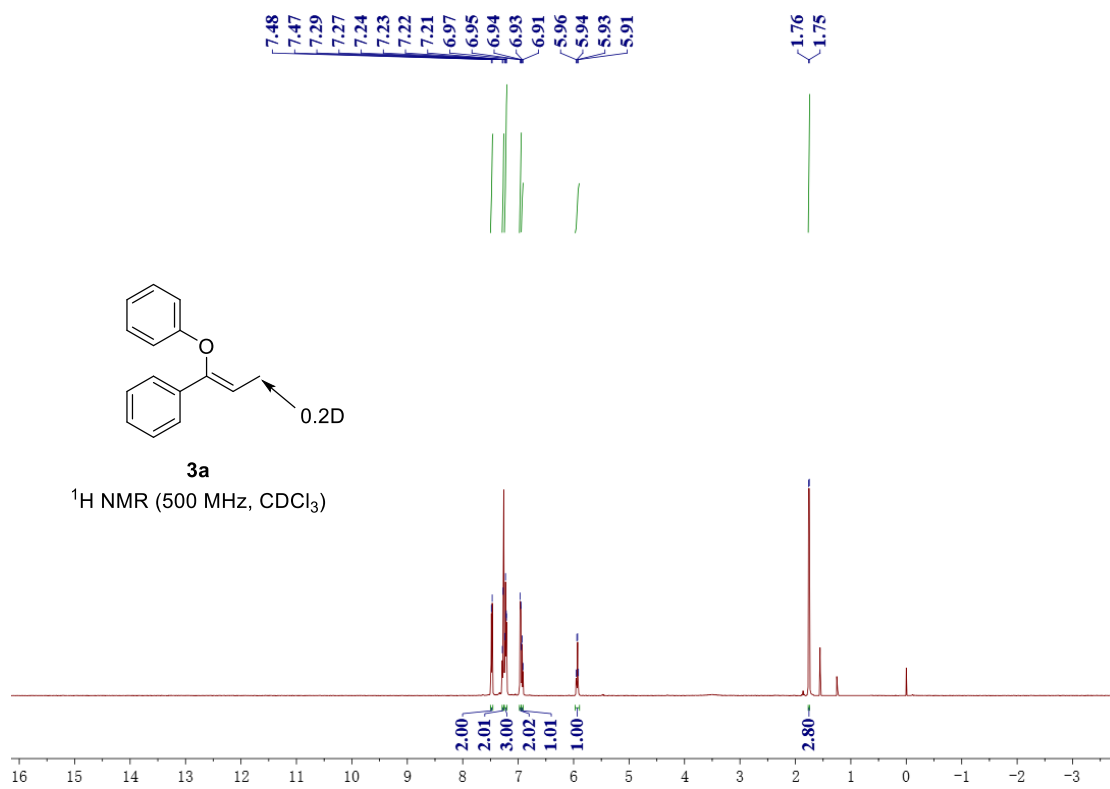

Supplement: d4ob01220h1.pdf [file d4ob01220h1.pdf]
